# Supplementary material for: 68Ga-MY6349 PET/CT imaging to assess Trop2 expression in multiple types of cancer
Source: JCI journal article supplement (doi:10.1172/jci185408), 2024-11-07
Supplement: sd2 [file 2]

# ICMJE DISCLOSURE FORM

**Date:** 9/29/2024

**Your Name:** Haojun Chen

**Manuscript Title:** 68Ga-MY6349 PET/CT imaging to assess Trop2 expression in multiple types of cancer

**Manuscript Number (if known):** 185408-JCI-CMED-RV-2

In the interest of transparency, we ask you to disclose all relationships/activities/interests listed below that are related to the content of your manuscript. "Related" means any relation with for-profit or not-for-profit third parties whose interests may be affected by the content of the manuscript. Disclosure represents a commitment to transparency and does not necessarily indicate a bias. If you are in doubt about whether to list a relationship/activity/interest, it is preferable that you do so.

The author's relationships/activities/interests should be defined broadly. For example, if your manuscript pertains to the epidemiology of hypertension, you should declare all relationships with manufacturers of antihypertensive medication, even if that medication is not mentioned in the manuscript.

In item #1 below, report all support for the work reported in this manuscript without time limit. For all other items, the time frame for disclosure is the past 36 months.

|                                                                                                              |                                                                                                                                                                                        | Name all entities with whom you have this relationship or indicate none (add rows as needed) | Specifications/Comments (e.g., if payments were made to you or to your institution)                                                                                                                                                                                                                                                                                                                                                                                                                                                                                                                                                                                                                                                                                                              |                                                                                                              |                                                                                                                                                                                        |                                                                                                     |  |                                                          |  |
|--------------------------------------------------------------------------------------------------------------|----------------------------------------------------------------------------------------------------------------------------------------------------------------------------------------|----------------------------------------------------------------------------------------------|--------------------------------------------------------------------------------------------------------------------------------------------------------------------------------------------------------------------------------------------------------------------------------------------------------------------------------------------------------------------------------------------------------------------------------------------------------------------------------------------------------------------------------------------------------------------------------------------------------------------------------------------------------------------------------------------------------------------------------------------------------------------------------------------------|--------------------------------------------------------------------------------------------------------------|----------------------------------------------------------------------------------------------------------------------------------------------------------------------------------------|-----------------------------------------------------------------------------------------------------|--|----------------------------------------------------------|--|
| <b>Time frame: Since the initial planning of the work</b>                                                    |                                                                                                                                                                                        |                                                                                              |                                                                                                                                                                                                                                                                                                                                                                                                                                                                                                                                                                                                                                                                                                                                                                                                  |                                                                                                              |                                                                                                                                                                                        |                                                                                                     |  |                                                          |  |
| <b>1</b>                                                                                                     | All support for the present manuscript (e.g., funding, provision of study materials, medical writing, article processing charges, etc.)<br><b>No time limit for this item.</b>         | <input type="checkbox"/> <b>None</b>                                                         | <table border="1" style="width: 100%; border-collapse: collapse;"> <tr> <td style="width: 50%; padding: 5px;">Funding: The National Natural Science Foundation of China (NSFC) projects (grant numbers 82071961, 82422039)</td> <td style="width: 50%; padding: 5px;">Funding: Fujian Research and Training Grants for Young and Middle-aged Leaders in Healthcare, Key Scientific Research Program for Young Scholars in Fujian (grant number 2021ZQNZD016)</td> </tr> <tr> <td style="padding: 5px;">Funding: Fujian Natural Science Foundation for Distinguished Young Scholars (grant number 2022D005)</td> <td style="padding: 5px;"></td> </tr> <tr> <td colspan="2" style="text-align: right; padding: 5px;"><small>Click the tab key to add additional rows.</small></td> </tr> </table> | Funding: The National Natural Science Foundation of China (NSFC) projects (grant numbers 82071961, 82422039) | Funding: Fujian Research and Training Grants for Young and Middle-aged Leaders in Healthcare, Key Scientific Research Program for Young Scholars in Fujian (grant number 2021ZQNZD016) | Funding: Fujian Natural Science Foundation for Distinguished Young Scholars (grant number 2022D005) |  | <small>Click the tab key to add additional rows.</small> |  |
| Funding: The National Natural Science Foundation of China (NSFC) projects (grant numbers 82071961, 82422039) | Funding: Fujian Research and Training Grants for Young and Middle-aged Leaders in Healthcare, Key Scientific Research Program for Young Scholars in Fujian (grant number 2021ZQNZD016) |                                                                                              |                                                                                                                                                                                                                                                                                                                                                                                                                                                                                                                                                                                                                                                                                                                                                                                                  |                                                                                                              |                                                                                                                                                                                        |                                                                                                     |  |                                                          |  |
| Funding: Fujian Natural Science Foundation for Distinguished Young Scholars (grant number 2022D005)          |                                                                                                                                                                                        |                                                                                              |                                                                                                                                                                                                                                                                                                                                                                                                                                                                                                                                                                                                                                                                                                                                                                                                  |                                                                                                              |                                                                                                                                                                                        |                                                                                                     |  |                                                          |  |
| <small>Click the tab key to add additional rows.</small>                                                     |                                                                                                                                                                                        |                                                                                              |                                                                                                                                                                                                                                                                                                                                                                                                                                                                                                                                                                                                                                                                                                                                                                                                  |                                                                                                              |                                                                                                                                                                                        |                                                                                                     |  |                                                          |  |
| <b>Time frame: past 36 months</b>                                                                            |                                                                                                                                                                                        |                                                                                              |                                                                                                                                                                                                                                                                                                                                                                                                                                                                                                                                                                                                                                                                                                                                                                                                  |                                                                                                              |                                                                                                                                                                                        |                                                                                                     |  |                                                          |  |
| <b>2</b>                                                                                                     | Grants or contracts from any entity (if not indicated in item #1 above).                                                                                                               | <input checked="" type="checkbox"/> <b>None</b>                                              | <table border="1" style="width: 100%; border-collapse: collapse; height: 40px;"> <tr><td style="width: 50%;"></td><td style="width: 50%;"></td></tr> <tr><td></td><td></td></tr> <tr><td></td><td></td></tr> </table>                                                                                                                                                                                                                                                                                                                                                                                                                                                                                                                                                                            |                                                                                                              |                                                                                                                                                                                        |                                                                                                     |  |                                                          |  |
|                                                                                                              |                                                                                                                                                                                        |                                                                                              |                                                                                                                                                                                                                                                                                                                                                                                                                                                                                                                                                                                                                                                                                                                                                                                                  |                                                                                                              |                                                                                                                                                                                        |                                                                                                     |  |                                                          |  |
|                                                                                                              |                                                                                                                                                                                        |                                                                                              |                                                                                                                                                                                                                                                                                                                                                                                                                                                                                                                                                                                                                                                                                                                                                                                                  |                                                                                                              |                                                                                                                                                                                        |                                                                                                     |  |                                                          |  |
|                                                                                                              |                                                                                                                                                                                        |                                                                                              |                                                                                                                                                                                                                                                                                                                                                                                                                                                                                                                                                                                                                                                                                                                                                                                                  |                                                                                                              |                                                                                                                                                                                        |                                                                                                     |  |                                                          |  |
| <b>3</b>                                                                                                     | Royalties or licenses                                                                                                                                                                  | <input checked="" type="checkbox"/> <b>None</b>                                              | <table border="1" style="width: 100%; border-collapse: collapse; height: 40px;"> <tr><td style="width: 50%;"></td><td style="width: 50%;"></td></tr> <tr><td></td><td></td></tr> <tr><td></td><td></td></tr> </table>                                                                                                                                                                                                                                                                                                                                                                                                                                                                                                                                                                            |                                                                                                              |                                                                                                                                                                                        |                                                                                                     |  |                                                          |  |
|                                                                                                              |                                                                                                                                                                                        |                                                                                              |                                                                                                                                                                                                                                                                                                                                                                                                                                                                                                                                                                                                                                                                                                                                                                                                  |                                                                                                              |                                                                                                                                                                                        |                                                                                                     |  |                                                          |  |
|                                                                                                              |                                                                                                                                                                                        |                                                                                              |                                                                                                                                                                                                                                                                                                                                                                                                                                                                                                                                                                                                                                                                                                                                                                                                  |                                                                                                              |                                                                                                                                                                                        |                                                                                                     |  |                                                          |  |
|                                                                                                              |                                                                                                                                                                                        |                                                                                              |                                                                                                                                                                                                                                                                                                                                                                                                                                                                                                                                                                                                                                                                                                                                                                                                  |                                                                                                              |                                                                                                                                                                                        |                                                                                                     |  |                                                          |  |

|    |                                                                                                              | Name all entities with whom you have this relationship or indicate none (add rows as needed)                                                                                                                                                                                                                                                                                   | Specifications/Comments (e.g., if payments were made to you or to your institution) |  |  |  |  |  |  |
|----|--------------------------------------------------------------------------------------------------------------|--------------------------------------------------------------------------------------------------------------------------------------------------------------------------------------------------------------------------------------------------------------------------------------------------------------------------------------------------------------------------------|-------------------------------------------------------------------------------------|--|--|--|--|--|--|
| 4  | Consulting fees                                                                                              | <input checked="" type="checkbox"/> <b>None</b><br><table border="1" style="width: 100%; border-collapse: collapse;"> <tr><td style="width: 50%; height: 20px;"></td><td style="width: 50%; height: 20px;"></td></tr> <tr><td style="height: 20px;"></td><td style="height: 20px;"></td></tr> <tr><td style="height: 20px;"></td><td style="height: 20px;"></td></tr> </table> |                                                                                     |  |  |  |  |  |  |
|    |                                                                                                              |                                                                                                                                                                                                                                                                                                                                                                                |                                                                                     |  |  |  |  |  |  |
|    |                                                                                                              |                                                                                                                                                                                                                                                                                                                                                                                |                                                                                     |  |  |  |  |  |  |
|    |                                                                                                              |                                                                                                                                                                                                                                                                                                                                                                                |                                                                                     |  |  |  |  |  |  |
| 5  | Payment or honoraria for lectures, presentations, speakers bureaus, manuscript writing or educational events | <input checked="" type="checkbox"/> <b>None</b><br><table border="1" style="width: 100%; border-collapse: collapse;"> <tr><td style="width: 50%; height: 20px;"></td><td style="width: 50%; height: 20px;"></td></tr> <tr><td style="height: 20px;"></td><td style="height: 20px;"></td></tr> </table>                                                                         |                                                                                     |  |  |  |  |  |  |
|    |                                                                                                              |                                                                                                                                                                                                                                                                                                                                                                                |                                                                                     |  |  |  |  |  |  |
|    |                                                                                                              |                                                                                                                                                                                                                                                                                                                                                                                |                                                                                     |  |  |  |  |  |  |
| 6  | Payment for expert testimony                                                                                 | <input checked="" type="checkbox"/> <b>None</b><br><table border="1" style="width: 100%; border-collapse: collapse;"> <tr><td style="width: 50%; height: 20px;"></td><td style="width: 50%; height: 20px;"></td></tr> <tr><td style="height: 20px;"></td><td style="height: 20px;"></td></tr> </table>                                                                         |                                                                                     |  |  |  |  |  |  |
|    |                                                                                                              |                                                                                                                                                                                                                                                                                                                                                                                |                                                                                     |  |  |  |  |  |  |
|    |                                                                                                              |                                                                                                                                                                                                                                                                                                                                                                                |                                                                                     |  |  |  |  |  |  |
| 7  | Support for attending meetings and/or travel                                                                 | <input checked="" type="checkbox"/> <b>None</b><br><table border="1" style="width: 100%; border-collapse: collapse;"> <tr><td style="width: 50%; height: 20px;"></td><td style="width: 50%; height: 20px;"></td></tr> <tr><td style="height: 20px;"></td><td style="height: 20px;"></td></tr> </table>                                                                         |                                                                                     |  |  |  |  |  |  |
|    |                                                                                                              |                                                                                                                                                                                                                                                                                                                                                                                |                                                                                     |  |  |  |  |  |  |
|    |                                                                                                              |                                                                                                                                                                                                                                                                                                                                                                                |                                                                                     |  |  |  |  |  |  |
| 8  | Patents planned, issued or pending                                                                           | <input checked="" type="checkbox"/> <b>None</b><br><table border="1" style="width: 100%; border-collapse: collapse;"> <tr><td style="width: 50%; height: 20px;"></td><td style="width: 50%; height: 20px;"></td></tr> <tr><td style="height: 20px;"></td><td style="height: 20px;"></td></tr> </table>                                                                         |                                                                                     |  |  |  |  |  |  |
|    |                                                                                                              |                                                                                                                                                                                                                                                                                                                                                                                |                                                                                     |  |  |  |  |  |  |
|    |                                                                                                              |                                                                                                                                                                                                                                                                                                                                                                                |                                                                                     |  |  |  |  |  |  |
| 9  | Participation on a Data Safety Monitoring Board or Advisory Board                                            | <input checked="" type="checkbox"/> <b>None</b><br><table border="1" style="width: 100%; border-collapse: collapse;"> <tr><td style="width: 50%; height: 20px;"></td><td style="width: 50%; height: 20px;"></td></tr> <tr><td style="height: 20px;"></td><td style="height: 20px;"></td></tr> </table>                                                                         |                                                                                     |  |  |  |  |  |  |
|    |                                                                                                              |                                                                                                                                                                                                                                                                                                                                                                                |                                                                                     |  |  |  |  |  |  |
|    |                                                                                                              |                                                                                                                                                                                                                                                                                                                                                                                |                                                                                     |  |  |  |  |  |  |
| 10 | Leadership or fiduciary role in other board, society, committee or advocacy group, paid or unpaid            | <input checked="" type="checkbox"/> <b>None</b><br><table border="1" style="width: 100%; border-collapse: collapse;"> <tr><td style="width: 50%; height: 20px;"></td><td style="width: 50%; height: 20px;"></td></tr> <tr><td style="height: 20px;"></td><td style="height: 20px;"></td></tr> </table>                                                                         |                                                                                     |  |  |  |  |  |  |
|    |                                                                                                              |                                                                                                                                                                                                                                                                                                                                                                                |                                                                                     |  |  |  |  |  |  |
|    |                                                                                                              |                                                                                                                                                                                                                                                                                                                                                                                |                                                                                     |  |  |  |  |  |  |

|           |                                                                                  | Name all entities with whom you have this relationship or indicate none (add rows as needed)                                                                                                                                                                                                             | Specifications/Comments (e.g., if payments were made to you or to your institution) |  |  |  |  |  |  |
|-----------|----------------------------------------------------------------------------------|----------------------------------------------------------------------------------------------------------------------------------------------------------------------------------------------------------------------------------------------------------------------------------------------------------|-------------------------------------------------------------------------------------|--|--|--|--|--|--|
| <b>11</b> | Stock or stock options                                                           | <input checked="" type="checkbox"/> <b>None</b><br><table border="1" style="width: 100%; border-collapse: collapse;"> <tr><td style="height: 20px;"></td><td style="width: 50%;"></td></tr> <tr><td style="height: 20px;"></td><td></td></tr> <tr><td style="height: 20px;"></td><td></td></tr> </table> |                                                                                     |  |  |  |  |  |  |
|           |                                                                                  |                                                                                                                                                                                                                                                                                                          |                                                                                     |  |  |  |  |  |  |
|           |                                                                                  |                                                                                                                                                                                                                                                                                                          |                                                                                     |  |  |  |  |  |  |
|           |                                                                                  |                                                                                                                                                                                                                                                                                                          |                                                                                     |  |  |  |  |  |  |
| <b>12</b> | Receipt of equipment, materials, drugs, medical writing, gifts or other services | <input checked="" type="checkbox"/> <b>None</b><br><table border="1" style="width: 100%; border-collapse: collapse;"> <tr><td style="height: 20px;"></td><td style="width: 50%;"></td></tr> <tr><td style="height: 20px;"></td><td></td></tr> <tr><td style="height: 20px;"></td><td></td></tr> </table> |                                                                                     |  |  |  |  |  |  |
|           |                                                                                  |                                                                                                                                                                                                                                                                                                          |                                                                                     |  |  |  |  |  |  |
|           |                                                                                  |                                                                                                                                                                                                                                                                                                          |                                                                                     |  |  |  |  |  |  |
|           |                                                                                  |                                                                                                                                                                                                                                                                                                          |                                                                                     |  |  |  |  |  |  |
| <b>13</b> | Other financial or non-financial interests                                       | <input checked="" type="checkbox"/> <b>None</b><br><table border="1" style="width: 100%; border-collapse: collapse;"> <tr><td style="height: 20px;"></td><td style="width: 50%;"></td></tr> <tr><td style="height: 20px;"></td><td></td></tr> <tr><td style="height: 20px;"></td><td></td></tr> </table> |                                                                                     |  |  |  |  |  |  |
|           |                                                                                  |                                                                                                                                                                                                                                                                                                          |                                                                                     |  |  |  |  |  |  |
|           |                                                                                  |                                                                                                                                                                                                                                                                                                          |                                                                                     |  |  |  |  |  |  |
|           |                                                                                  |                                                                                                                                                                                                                                                                                                          |                                                                                     |  |  |  |  |  |  |

**Please place an "X" next to the following statement to indicate your agreement:**

I certify that I have answered every question and have not altered the wording of any of the questions on this form.

## ICMJE DISCLOSURE FORM

**Date:** 9/29/2024

**Your Name:** Liang Zhao

**Manuscript Title:** 68Ga-MY6349 PET/CT imaging to assess Trop2 expression in multiple types of cancer

**Manuscript Number (if known):** 185408-JCI-CMED-RV-2

In the interest of transparency, we ask you to disclose all relationships/activities/interests listed below that are related to the content of your manuscript. "Related" means any relation with for-profit or not-for-profit third parties whose interests may be affected by the content of the manuscript. Disclosure represents a commitment to transparency and does not necessarily indicate a bias. If you are in doubt about whether to list a relationship/activity/interest, it is preferable that you do so.

The author's relationships/activities/interests should be defined broadly. For example, if your manuscript pertains to the epidemiology of hypertension, you should declare all relationships with manufacturers of antihypertensive medication, even if that medication is not mentioned in the manuscript.

In item #1 below, report all support for the work reported in this manuscript without time limit. For all other items, the time frame for disclosure is the past 36 months.

|                                                    |                                                                                                                                                                                | Name all entities with whom you have this relationship or indicate none (add rows as needed)                                                                                                                                                                                                                                                   | Specifications/Comments (e.g., if payments were made to you or to your institution) |  |  |  |  |  |                                                                                                                                                                                                                                                                                                                                                                                                         |  |  |  |  |  |  |
|----------------------------------------------------|--------------------------------------------------------------------------------------------------------------------------------------------------------------------------------|------------------------------------------------------------------------------------------------------------------------------------------------------------------------------------------------------------------------------------------------------------------------------------------------------------------------------------------------|-------------------------------------------------------------------------------------|--|--|--|--|--|---------------------------------------------------------------------------------------------------------------------------------------------------------------------------------------------------------------------------------------------------------------------------------------------------------------------------------------------------------------------------------------------------------|--|--|--|--|--|--|
| Time frame: Since the initial planning of the work |                                                                                                                                                                                |                                                                                                                                                                                                                                                                                                                                                |                                                                                     |  |  |  |  |  |                                                                                                                                                                                                                                                                                                                                                                                                         |  |  |  |  |  |  |
| <b>1</b>                                           | All support for the present manuscript (e.g., funding, provision of study materials, medical writing, article processing charges, etc.)<br><b>No time limit for this item.</b> | <input checked="" type="checkbox"/> <b>None</b><br><table border="1" style="width: 100%; height: 40px; margin-top: 5px;"> <tr><td style="width: 50%;"></td><td style="width: 50%;"></td></tr> <tr><td style="width: 50%;"></td><td style="width: 50%;"></td></tr> <tr><td style="width: 50%;"></td><td style="width: 50%;"></td></tr> </table> |                                                                                     |  |  |  |  |  | <table border="1" style="width: 100%; height: 40px; margin-top: 5px;"> <tr><td style="width: 50%;"></td><td style="width: 50%;"></td></tr> <tr><td style="width: 50%;"></td><td style="width: 50%;"></td></tr> <tr><td style="width: 50%;"></td><td style="width: 50%;"></td></tr> </table> <p style="font-size: small; color: gray; text-align: center;">Click the tab key to add additional rows.</p> |  |  |  |  |  |  |
|                                                    |                                                                                                                                                                                |                                                                                                                                                                                                                                                                                                                                                |                                                                                     |  |  |  |  |  |                                                                                                                                                                                                                                                                                                                                                                                                         |  |  |  |  |  |  |
|                                                    |                                                                                                                                                                                |                                                                                                                                                                                                                                                                                                                                                |                                                                                     |  |  |  |  |  |                                                                                                                                                                                                                                                                                                                                                                                                         |  |  |  |  |  |  |
|                                                    |                                                                                                                                                                                |                                                                                                                                                                                                                                                                                                                                                |                                                                                     |  |  |  |  |  |                                                                                                                                                                                                                                                                                                                                                                                                         |  |  |  |  |  |  |
|                                                    |                                                                                                                                                                                |                                                                                                                                                                                                                                                                                                                                                |                                                                                     |  |  |  |  |  |                                                                                                                                                                                                                                                                                                                                                                                                         |  |  |  |  |  |  |
|                                                    |                                                                                                                                                                                |                                                                                                                                                                                                                                                                                                                                                |                                                                                     |  |  |  |  |  |                                                                                                                                                                                                                                                                                                                                                                                                         |  |  |  |  |  |  |
|                                                    |                                                                                                                                                                                |                                                                                                                                                                                                                                                                                                                                                |                                                                                     |  |  |  |  |  |                                                                                                                                                                                                                                                                                                                                                                                                         |  |  |  |  |  |  |
| Time frame: past 36 months                         |                                                                                                                                                                                |                                                                                                                                                                                                                                                                                                                                                |                                                                                     |  |  |  |  |  |                                                                                                                                                                                                                                                                                                                                                                                                         |  |  |  |  |  |  |
| <b>2</b>                                           | Grants or contracts from any entity (if not indicated in item #1 above).                                                                                                       | <input checked="" type="checkbox"/> <b>None</b><br><table border="1" style="width: 100%; height: 40px; margin-top: 5px;"> <tr><td style="width: 50%;"></td><td style="width: 50%;"></td></tr> <tr><td style="width: 50%;"></td><td style="width: 50%;"></td></tr> <tr><td style="width: 50%;"></td><td style="width: 50%;"></td></tr> </table> |                                                                                     |  |  |  |  |  | <table border="1" style="width: 100%; height: 40px; margin-top: 5px;"> <tr><td style="width: 50%;"></td><td style="width: 50%;"></td></tr> <tr><td style="width: 50%;"></td><td style="width: 50%;"></td></tr> <tr><td style="width: 50%;"></td><td style="width: 50%;"></td></tr> </table>                                                                                                             |  |  |  |  |  |  |
|                                                    |                                                                                                                                                                                |                                                                                                                                                                                                                                                                                                                                                |                                                                                     |  |  |  |  |  |                                                                                                                                                                                                                                                                                                                                                                                                         |  |  |  |  |  |  |
|                                                    |                                                                                                                                                                                |                                                                                                                                                                                                                                                                                                                                                |                                                                                     |  |  |  |  |  |                                                                                                                                                                                                                                                                                                                                                                                                         |  |  |  |  |  |  |
|                                                    |                                                                                                                                                                                |                                                                                                                                                                                                                                                                                                                                                |                                                                                     |  |  |  |  |  |                                                                                                                                                                                                                                                                                                                                                                                                         |  |  |  |  |  |  |
|                                                    |                                                                                                                                                                                |                                                                                                                                                                                                                                                                                                                                                |                                                                                     |  |  |  |  |  |                                                                                                                                                                                                                                                                                                                                                                                                         |  |  |  |  |  |  |
|                                                    |                                                                                                                                                                                |                                                                                                                                                                                                                                                                                                                                                |                                                                                     |  |  |  |  |  |                                                                                                                                                                                                                                                                                                                                                                                                         |  |  |  |  |  |  |
|                                                    |                                                                                                                                                                                |                                                                                                                                                                                                                                                                                                                                                |                                                                                     |  |  |  |  |  |                                                                                                                                                                                                                                                                                                                                                                                                         |  |  |  |  |  |  |
| <b>3</b>                                           | Royalties or licenses                                                                                                                                                          | <input checked="" type="checkbox"/> <b>None</b><br><table border="1" style="width: 100%; height: 40px; margin-top: 5px;"> <tr><td style="width: 50%;"></td><td style="width: 50%;"></td></tr> <tr><td style="width: 50%;"></td><td style="width: 50%;"></td></tr> <tr><td style="width: 50%;"></td><td style="width: 50%;"></td></tr> </table> |                                                                                     |  |  |  |  |  | <table border="1" style="width: 100%; height: 40px; margin-top: 5px;"> <tr><td style="width: 50%;"></td><td style="width: 50%;"></td></tr> <tr><td style="width: 50%;"></td><td style="width: 50%;"></td></tr> <tr><td style="width: 50%;"></td><td style="width: 50%;"></td></tr> </table>                                                                                                             |  |  |  |  |  |  |
|                                                    |                                                                                                                                                                                |                                                                                                                                                                                                                                                                                                                                                |                                                                                     |  |  |  |  |  |                                                                                                                                                                                                                                                                                                                                                                                                         |  |  |  |  |  |  |
|                                                    |                                                                                                                                                                                |                                                                                                                                                                                                                                                                                                                                                |                                                                                     |  |  |  |  |  |                                                                                                                                                                                                                                                                                                                                                                                                         |  |  |  |  |  |  |
|                                                    |                                                                                                                                                                                |                                                                                                                                                                                                                                                                                                                                                |                                                                                     |  |  |  |  |  |                                                                                                                                                                                                                                                                                                                                                                                                         |  |  |  |  |  |  |
|                                                    |                                                                                                                                                                                |                                                                                                                                                                                                                                                                                                                                                |                                                                                     |  |  |  |  |  |                                                                                                                                                                                                                                                                                                                                                                                                         |  |  |  |  |  |  |
|                                                    |                                                                                                                                                                                |                                                                                                                                                                                                                                                                                                                                                |                                                                                     |  |  |  |  |  |                                                                                                                                                                                                                                                                                                                                                                                                         |  |  |  |  |  |  |
|                                                    |                                                                                                                                                                                |                                                                                                                                                                                                                                                                                                                                                |                                                                                     |  |  |  |  |  |                                                                                                                                                                                                                                                                                                                                                                                                         |  |  |  |  |  |  |

|    |                                                                                                              | Name all entities with whom you have this relationship or indicate none (add rows as needed)                                                                                                                                                                                                                                                                           | Specifications/Comments (e.g., if payments were made to you or to your institution) |  |  |  |  |  |  |  |  |
|----|--------------------------------------------------------------------------------------------------------------|------------------------------------------------------------------------------------------------------------------------------------------------------------------------------------------------------------------------------------------------------------------------------------------------------------------------------------------------------------------------|-------------------------------------------------------------------------------------|--|--|--|--|--|--|--|--|
| 4  | Consulting fees                                                                                              | <input checked="" type="checkbox"/> <b>None</b><br><table border="1" style="width: 100%; border-collapse: collapse;"> <tr><td style="width: 50%; height: 20px;"></td><td style="width: 50%;"></td></tr> <tr><td style="height: 20px;"></td><td></td></tr> <tr><td style="height: 20px;"></td><td></td></tr> <tr><td style="height: 20px;"></td><td></td></tr> </table> |                                                                                     |  |  |  |  |  |  |  |  |
|    |                                                                                                              |                                                                                                                                                                                                                                                                                                                                                                        |                                                                                     |  |  |  |  |  |  |  |  |
|    |                                                                                                              |                                                                                                                                                                                                                                                                                                                                                                        |                                                                                     |  |  |  |  |  |  |  |  |
|    |                                                                                                              |                                                                                                                                                                                                                                                                                                                                                                        |                                                                                     |  |  |  |  |  |  |  |  |
|    |                                                                                                              |                                                                                                                                                                                                                                                                                                                                                                        |                                                                                     |  |  |  |  |  |  |  |  |
| 5  | Payment or honoraria for lectures, presentations, speakers bureaus, manuscript writing or educational events | <input checked="" type="checkbox"/> <b>None</b><br><table border="1" style="width: 100%; border-collapse: collapse;"> <tr><td style="width: 50%; height: 20px;"></td><td style="width: 50%;"></td></tr> <tr><td style="height: 20px;"></td><td></td></tr> <tr><td style="height: 20px;"></td><td></td></tr> </table>                                                   |                                                                                     |  |  |  |  |  |  |  |  |
|    |                                                                                                              |                                                                                                                                                                                                                                                                                                                                                                        |                                                                                     |  |  |  |  |  |  |  |  |
|    |                                                                                                              |                                                                                                                                                                                                                                                                                                                                                                        |                                                                                     |  |  |  |  |  |  |  |  |
|    |                                                                                                              |                                                                                                                                                                                                                                                                                                                                                                        |                                                                                     |  |  |  |  |  |  |  |  |
| 6  | Payment for expert testimony                                                                                 | <input checked="" type="checkbox"/> <b>None</b><br><table border="1" style="width: 100%; border-collapse: collapse;"> <tr><td style="width: 50%; height: 20px;"></td><td style="width: 50%;"></td></tr> <tr><td style="height: 20px;"></td><td></td></tr> <tr><td style="height: 20px;"></td><td></td></tr> </table>                                                   |                                                                                     |  |  |  |  |  |  |  |  |
|    |                                                                                                              |                                                                                                                                                                                                                                                                                                                                                                        |                                                                                     |  |  |  |  |  |  |  |  |
|    |                                                                                                              |                                                                                                                                                                                                                                                                                                                                                                        |                                                                                     |  |  |  |  |  |  |  |  |
|    |                                                                                                              |                                                                                                                                                                                                                                                                                                                                                                        |                                                                                     |  |  |  |  |  |  |  |  |
| 7  | Support for attending meetings and/or travel                                                                 | <input checked="" type="checkbox"/> <b>None</b><br><table border="1" style="width: 100%; border-collapse: collapse;"> <tr><td style="width: 50%; height: 20px;"></td><td style="width: 50%;"></td></tr> <tr><td style="height: 20px;"></td><td></td></tr> <tr><td style="height: 20px;"></td><td></td></tr> </table>                                                   |                                                                                     |  |  |  |  |  |  |  |  |
|    |                                                                                                              |                                                                                                                                                                                                                                                                                                                                                                        |                                                                                     |  |  |  |  |  |  |  |  |
|    |                                                                                                              |                                                                                                                                                                                                                                                                                                                                                                        |                                                                                     |  |  |  |  |  |  |  |  |
|    |                                                                                                              |                                                                                                                                                                                                                                                                                                                                                                        |                                                                                     |  |  |  |  |  |  |  |  |
| 8  | Patents planned, issued or pending                                                                           | <input checked="" type="checkbox"/> <b>None</b><br><table border="1" style="width: 100%; border-collapse: collapse;"> <tr><td style="width: 50%; height: 20px;"></td><td style="width: 50%;"></td></tr> <tr><td style="height: 20px;"></td><td></td></tr> <tr><td style="height: 20px;"></td><td></td></tr> </table>                                                   |                                                                                     |  |  |  |  |  |  |  |  |
|    |                                                                                                              |                                                                                                                                                                                                                                                                                                                                                                        |                                                                                     |  |  |  |  |  |  |  |  |
|    |                                                                                                              |                                                                                                                                                                                                                                                                                                                                                                        |                                                                                     |  |  |  |  |  |  |  |  |
|    |                                                                                                              |                                                                                                                                                                                                                                                                                                                                                                        |                                                                                     |  |  |  |  |  |  |  |  |
| 9  | Participation on a Data Safety Monitoring Board or Advisory Board                                            | <input checked="" type="checkbox"/> <b>None</b><br><table border="1" style="width: 100%; border-collapse: collapse;"> <tr><td style="width: 50%; height: 20px;"></td><td style="width: 50%;"></td></tr> <tr><td style="height: 20px;"></td><td></td></tr> <tr><td style="height: 20px;"></td><td></td></tr> </table>                                                   |                                                                                     |  |  |  |  |  |  |  |  |
|    |                                                                                                              |                                                                                                                                                                                                                                                                                                                                                                        |                                                                                     |  |  |  |  |  |  |  |  |
|    |                                                                                                              |                                                                                                                                                                                                                                                                                                                                                                        |                                                                                     |  |  |  |  |  |  |  |  |
|    |                                                                                                              |                                                                                                                                                                                                                                                                                                                                                                        |                                                                                     |  |  |  |  |  |  |  |  |
| 10 | Leadership or fiduciary role in other board, society, committee or advocacy group, paid or unpaid            | <input checked="" type="checkbox"/> <b>None</b><br><table border="1" style="width: 100%; border-collapse: collapse;"> <tr><td style="width: 50%; height: 20px;"></td><td style="width: 50%;"></td></tr> <tr><td style="height: 20px;"></td><td></td></tr> <tr><td style="height: 20px;"></td><td></td></tr> </table>                                                   |                                                                                     |  |  |  |  |  |  |  |  |
|    |                                                                                                              |                                                                                                                                                                                                                                                                                                                                                                        |                                                                                     |  |  |  |  |  |  |  |  |
|    |                                                                                                              |                                                                                                                                                                                                                                                                                                                                                                        |                                                                                     |  |  |  |  |  |  |  |  |
|    |                                                                                                              |                                                                                                                                                                                                                                                                                                                                                                        |                                                                                     |  |  |  |  |  |  |  |  |

|           |                                                                                  | Name all entities with whom you have this relationship or indicate none (add rows as needed)                                                                                                                                                                                                             | Specifications/Comments (e.g., if payments were made to you or to your institution) |  |  |  |  |  |  |
|-----------|----------------------------------------------------------------------------------|----------------------------------------------------------------------------------------------------------------------------------------------------------------------------------------------------------------------------------------------------------------------------------------------------------|-------------------------------------------------------------------------------------|--|--|--|--|--|--|
| <b>11</b> | Stock or stock options                                                           | <input checked="" type="checkbox"/> <b>None</b><br><table border="1" style="width: 100%; border-collapse: collapse;"> <tr><td style="height: 20px;"></td><td style="width: 50%;"></td></tr> <tr><td style="height: 20px;"></td><td></td></tr> <tr><td style="height: 20px;"></td><td></td></tr> </table> |                                                                                     |  |  |  |  |  |  |
|           |                                                                                  |                                                                                                                                                                                                                                                                                                          |                                                                                     |  |  |  |  |  |  |
|           |                                                                                  |                                                                                                                                                                                                                                                                                                          |                                                                                     |  |  |  |  |  |  |
|           |                                                                                  |                                                                                                                                                                                                                                                                                                          |                                                                                     |  |  |  |  |  |  |
| <b>12</b> | Receipt of equipment, materials, drugs, medical writing, gifts or other services | <input checked="" type="checkbox"/> <b>None</b><br><table border="1" style="width: 100%; border-collapse: collapse;"> <tr><td style="height: 20px;"></td><td style="width: 50%;"></td></tr> <tr><td style="height: 20px;"></td><td></td></tr> <tr><td style="height: 20px;"></td><td></td></tr> </table> |                                                                                     |  |  |  |  |  |  |
|           |                                                                                  |                                                                                                                                                                                                                                                                                                          |                                                                                     |  |  |  |  |  |  |
|           |                                                                                  |                                                                                                                                                                                                                                                                                                          |                                                                                     |  |  |  |  |  |  |
|           |                                                                                  |                                                                                                                                                                                                                                                                                                          |                                                                                     |  |  |  |  |  |  |
| <b>13</b> | Other financial or non-financial interests                                       | <input checked="" type="checkbox"/> <b>None</b><br><table border="1" style="width: 100%; border-collapse: collapse;"> <tr><td style="height: 20px;"></td><td style="width: 50%;"></td></tr> <tr><td style="height: 20px;"></td><td></td></tr> <tr><td style="height: 20px;"></td><td></td></tr> </table> |                                                                                     |  |  |  |  |  |  |
|           |                                                                                  |                                                                                                                                                                                                                                                                                                          |                                                                                     |  |  |  |  |  |  |
|           |                                                                                  |                                                                                                                                                                                                                                                                                                          |                                                                                     |  |  |  |  |  |  |
|           |                                                                                  |                                                                                                                                                                                                                                                                                                          |                                                                                     |  |  |  |  |  |  |

**Please place an "X" next to the following statement to indicate your agreement:**

I certify that I have answered every question and have not altered the wording of any of the questions on this form.

# ICMJE DISCLOSURE FORM

**Date:** 9/29/2024

**Your Name:** Yizhen Pang

**Manuscript Title:** 68Ga-MY6349 PET/CT imaging to assess Trop2 expression in multiple types of cancer

**Manuscript Number (if known):** 185408-JCI-CMED-RV-2

In the interest of transparency, we ask you to disclose all relationships/activities/interests listed below that are related to the content of your manuscript. "Related" means any relation with for-profit or not-for-profit third parties whose interests may be affected by the content of the manuscript. Disclosure represents a commitment to transparency and does not necessarily indicate a bias. If you are in doubt about whether to list a relationship/activity/interest, it is preferable that you do so.

The author's relationships/activities/interests should be defined broadly. For example, if your manuscript pertains to the epidemiology of hypertension, you should declare all relationships with manufacturers of antihypertensive medication, even if that medication is not mentioned in the manuscript.

In item #1 below, report all support for the work reported in this manuscript without time limit. For all other items, the time frame for disclosure is the past 36 months.

|                                                    |                                                                                                                                                                                | Name all entities with whom you have this relationship or indicate none (add rows as needed)                                                                                                                                                                                                                                                   | Specifications/Comments (e.g., if payments were made to you or to your institution) |  |  |  |  |  |                                           |
|----------------------------------------------------|--------------------------------------------------------------------------------------------------------------------------------------------------------------------------------|------------------------------------------------------------------------------------------------------------------------------------------------------------------------------------------------------------------------------------------------------------------------------------------------------------------------------------------------|-------------------------------------------------------------------------------------|--|--|--|--|--|-------------------------------------------|
| Time frame: Since the initial planning of the work |                                                                                                                                                                                |                                                                                                                                                                                                                                                                                                                                                |                                                                                     |  |  |  |  |  |                                           |
| <b>1</b>                                           | All support for the present manuscript (e.g., funding, provision of study materials, medical writing, article processing charges, etc.)<br><b>No time limit for this item.</b> | <input checked="" type="checkbox"/> <b>None</b><br><table border="1" style="width: 100%; height: 40px; margin-top: 5px;"> <tr><td style="width: 50%;"></td><td style="width: 50%;"></td></tr> <tr><td style="width: 50%;"></td><td style="width: 50%;"></td></tr> <tr><td style="width: 50%;"></td><td style="width: 50%;"></td></tr> </table> |                                                                                     |  |  |  |  |  | Click the tab key to add additional rows. |
|                                                    |                                                                                                                                                                                |                                                                                                                                                                                                                                                                                                                                                |                                                                                     |  |  |  |  |  |                                           |
|                                                    |                                                                                                                                                                                |                                                                                                                                                                                                                                                                                                                                                |                                                                                     |  |  |  |  |  |                                           |
|                                                    |                                                                                                                                                                                |                                                                                                                                                                                                                                                                                                                                                |                                                                                     |  |  |  |  |  |                                           |
| Time frame: past 36 months                         |                                                                                                                                                                                |                                                                                                                                                                                                                                                                                                                                                |                                                                                     |  |  |  |  |  |                                           |
| <b>2</b>                                           | Grants or contracts from any entity (if not indicated in item #1 above).                                                                                                       | <input checked="" type="checkbox"/> <b>None</b><br><table border="1" style="width: 100%; height: 40px; margin-top: 5px;"> <tr><td style="width: 50%;"></td><td style="width: 50%;"></td></tr> <tr><td style="width: 50%;"></td><td style="width: 50%;"></td></tr> <tr><td style="width: 50%;"></td><td style="width: 50%;"></td></tr> </table> |                                                                                     |  |  |  |  |  |                                           |
|                                                    |                                                                                                                                                                                |                                                                                                                                                                                                                                                                                                                                                |                                                                                     |  |  |  |  |  |                                           |
|                                                    |                                                                                                                                                                                |                                                                                                                                                                                                                                                                                                                                                |                                                                                     |  |  |  |  |  |                                           |
|                                                    |                                                                                                                                                                                |                                                                                                                                                                                                                                                                                                                                                |                                                                                     |  |  |  |  |  |                                           |
| <b>3</b>                                           | Royalties or licenses                                                                                                                                                          | <input checked="" type="checkbox"/> <b>None</b><br><table border="1" style="width: 100%; height: 40px; margin-top: 5px;"> <tr><td style="width: 50%;"></td><td style="width: 50%;"></td></tr> <tr><td style="width: 50%;"></td><td style="width: 50%;"></td></tr> <tr><td style="width: 50%;"></td><td style="width: 50%;"></td></tr> </table> |                                                                                     |  |  |  |  |  |                                           |
|                                                    |                                                                                                                                                                                |                                                                                                                                                                                                                                                                                                                                                |                                                                                     |  |  |  |  |  |                                           |
|                                                    |                                                                                                                                                                                |                                                                                                                                                                                                                                                                                                                                                |                                                                                     |  |  |  |  |  |                                           |
|                                                    |                                                                                                                                                                                |                                                                                                                                                                                                                                                                                                                                                |                                                                                     |  |  |  |  |  |                                           |

|    |                                                                                                              | Name all entities with whom you have this relationship or indicate none (add rows as needed)                                                                                                                                                                                                                                                                                                                                                           | Specifications/Comments (e.g., if payments were made to you or to your institution) |  |  |  |  |  |  |  |  |
|----|--------------------------------------------------------------------------------------------------------------|--------------------------------------------------------------------------------------------------------------------------------------------------------------------------------------------------------------------------------------------------------------------------------------------------------------------------------------------------------------------------------------------------------------------------------------------------------|-------------------------------------------------------------------------------------|--|--|--|--|--|--|--|--|
| 4  | Consulting fees                                                                                              | <input checked="" type="checkbox"/> <b>None</b><br><table border="1" style="width: 100%; border-collapse: collapse;"> <tr><td style="width: 50%; height: 20px;"></td><td style="width: 50%; height: 20px;"></td></tr> <tr><td style="height: 20px;"></td><td style="height: 20px;"></td></tr> <tr><td style="height: 20px;"></td><td style="height: 20px;"></td></tr> <tr><td style="height: 20px;"></td><td style="height: 20px;"></td></tr> </table> |                                                                                     |  |  |  |  |  |  |  |  |
|    |                                                                                                              |                                                                                                                                                                                                                                                                                                                                                                                                                                                        |                                                                                     |  |  |  |  |  |  |  |  |
|    |                                                                                                              |                                                                                                                                                                                                                                                                                                                                                                                                                                                        |                                                                                     |  |  |  |  |  |  |  |  |
|    |                                                                                                              |                                                                                                                                                                                                                                                                                                                                                                                                                                                        |                                                                                     |  |  |  |  |  |  |  |  |
|    |                                                                                                              |                                                                                                                                                                                                                                                                                                                                                                                                                                                        |                                                                                     |  |  |  |  |  |  |  |  |
| 5  | Payment or honoraria for lectures, presentations, speakers bureaus, manuscript writing or educational events | <input checked="" type="checkbox"/> <b>None</b><br><table border="1" style="width: 100%; border-collapse: collapse;"> <tr><td style="width: 50%; height: 20px;"></td><td style="width: 50%; height: 20px;"></td></tr> <tr><td style="height: 20px;"></td><td style="height: 20px;"></td></tr> <tr><td style="height: 20px;"></td><td style="height: 20px;"></td></tr> </table>                                                                         |                                                                                     |  |  |  |  |  |  |  |  |
|    |                                                                                                              |                                                                                                                                                                                                                                                                                                                                                                                                                                                        |                                                                                     |  |  |  |  |  |  |  |  |
|    |                                                                                                              |                                                                                                                                                                                                                                                                                                                                                                                                                                                        |                                                                                     |  |  |  |  |  |  |  |  |
|    |                                                                                                              |                                                                                                                                                                                                                                                                                                                                                                                                                                                        |                                                                                     |  |  |  |  |  |  |  |  |
| 6  | Payment for expert testimony                                                                                 | <input checked="" type="checkbox"/> <b>None</b><br><table border="1" style="width: 100%; border-collapse: collapse;"> <tr><td style="width: 50%; height: 20px;"></td><td style="width: 50%; height: 20px;"></td></tr> <tr><td style="height: 20px;"></td><td style="height: 20px;"></td></tr> <tr><td style="height: 20px;"></td><td style="height: 20px;"></td></tr> </table>                                                                         |                                                                                     |  |  |  |  |  |  |  |  |
|    |                                                                                                              |                                                                                                                                                                                                                                                                                                                                                                                                                                                        |                                                                                     |  |  |  |  |  |  |  |  |
|    |                                                                                                              |                                                                                                                                                                                                                                                                                                                                                                                                                                                        |                                                                                     |  |  |  |  |  |  |  |  |
|    |                                                                                                              |                                                                                                                                                                                                                                                                                                                                                                                                                                                        |                                                                                     |  |  |  |  |  |  |  |  |
| 7  | Support for attending meetings and/or travel                                                                 | <input checked="" type="checkbox"/> <b>None</b><br><table border="1" style="width: 100%; border-collapse: collapse;"> <tr><td style="width: 50%; height: 20px;"></td><td style="width: 50%; height: 20px;"></td></tr> <tr><td style="height: 20px;"></td><td style="height: 20px;"></td></tr> <tr><td style="height: 20px;"></td><td style="height: 20px;"></td></tr> </table>                                                                         |                                                                                     |  |  |  |  |  |  |  |  |
|    |                                                                                                              |                                                                                                                                                                                                                                                                                                                                                                                                                                                        |                                                                                     |  |  |  |  |  |  |  |  |
|    |                                                                                                              |                                                                                                                                                                                                                                                                                                                                                                                                                                                        |                                                                                     |  |  |  |  |  |  |  |  |
|    |                                                                                                              |                                                                                                                                                                                                                                                                                                                                                                                                                                                        |                                                                                     |  |  |  |  |  |  |  |  |
| 8  | Patents planned, issued or pending                                                                           | <input checked="" type="checkbox"/> <b>None</b><br><table border="1" style="width: 100%; border-collapse: collapse;"> <tr><td style="width: 50%; height: 20px;"></td><td style="width: 50%; height: 20px;"></td></tr> <tr><td style="height: 20px;"></td><td style="height: 20px;"></td></tr> <tr><td style="height: 20px;"></td><td style="height: 20px;"></td></tr> </table>                                                                         |                                                                                     |  |  |  |  |  |  |  |  |
|    |                                                                                                              |                                                                                                                                                                                                                                                                                                                                                                                                                                                        |                                                                                     |  |  |  |  |  |  |  |  |
|    |                                                                                                              |                                                                                                                                                                                                                                                                                                                                                                                                                                                        |                                                                                     |  |  |  |  |  |  |  |  |
|    |                                                                                                              |                                                                                                                                                                                                                                                                                                                                                                                                                                                        |                                                                                     |  |  |  |  |  |  |  |  |
| 9  | Participation on a Data Safety Monitoring Board or Advisory Board                                            | <input checked="" type="checkbox"/> <b>None</b><br><table border="1" style="width: 100%; border-collapse: collapse;"> <tr><td style="width: 50%; height: 20px;"></td><td style="width: 50%; height: 20px;"></td></tr> <tr><td style="height: 20px;"></td><td style="height: 20px;"></td></tr> <tr><td style="height: 20px;"></td><td style="height: 20px;"></td></tr> </table>                                                                         |                                                                                     |  |  |  |  |  |  |  |  |
|    |                                                                                                              |                                                                                                                                                                                                                                                                                                                                                                                                                                                        |                                                                                     |  |  |  |  |  |  |  |  |
|    |                                                                                                              |                                                                                                                                                                                                                                                                                                                                                                                                                                                        |                                                                                     |  |  |  |  |  |  |  |  |
|    |                                                                                                              |                                                                                                                                                                                                                                                                                                                                                                                                                                                        |                                                                                     |  |  |  |  |  |  |  |  |
| 10 | Leadership or fiduciary role in other board, society, committee or advocacy group, paid or unpaid            | <input checked="" type="checkbox"/> <b>None</b><br><table border="1" style="width: 100%; border-collapse: collapse;"> <tr><td style="width: 50%; height: 20px;"></td><td style="width: 50%; height: 20px;"></td></tr> <tr><td style="height: 20px;"></td><td style="height: 20px;"></td></tr> <tr><td style="height: 20px;"></td><td style="height: 20px;"></td></tr> </table>                                                                         |                                                                                     |  |  |  |  |  |  |  |  |
|    |                                                                                                              |                                                                                                                                                                                                                                                                                                                                                                                                                                                        |                                                                                     |  |  |  |  |  |  |  |  |
|    |                                                                                                              |                                                                                                                                                                                                                                                                                                                                                                                                                                                        |                                                                                     |  |  |  |  |  |  |  |  |
|    |                                                                                                              |                                                                                                                                                                                                                                                                                                                                                                                                                                                        |                                                                                     |  |  |  |  |  |  |  |  |

|           |                                                                                  | Name all entities with whom you have this relationship or indicate none (add rows as needed)                                                                                                                                                                                                             | Specifications/Comments (e.g., if payments were made to you or to your institution) |  |  |  |  |  |  |
|-----------|----------------------------------------------------------------------------------|----------------------------------------------------------------------------------------------------------------------------------------------------------------------------------------------------------------------------------------------------------------------------------------------------------|-------------------------------------------------------------------------------------|--|--|--|--|--|--|
| <b>11</b> | Stock or stock options                                                           | <input checked="" type="checkbox"/> <b>None</b><br><table border="1" style="width: 100%; border-collapse: collapse;"> <tr><td style="height: 20px;"></td><td style="width: 50%;"></td></tr> <tr><td style="height: 20px;"></td><td></td></tr> <tr><td style="height: 20px;"></td><td></td></tr> </table> |                                                                                     |  |  |  |  |  |  |
|           |                                                                                  |                                                                                                                                                                                                                                                                                                          |                                                                                     |  |  |  |  |  |  |
|           |                                                                                  |                                                                                                                                                                                                                                                                                                          |                                                                                     |  |  |  |  |  |  |
|           |                                                                                  |                                                                                                                                                                                                                                                                                                          |                                                                                     |  |  |  |  |  |  |
| <b>12</b> | Receipt of equipment, materials, drugs, medical writing, gifts or other services | <input checked="" type="checkbox"/> <b>None</b><br><table border="1" style="width: 100%; border-collapse: collapse;"> <tr><td style="height: 20px;"></td><td style="width: 50%;"></td></tr> <tr><td style="height: 20px;"></td><td></td></tr> <tr><td style="height: 20px;"></td><td></td></tr> </table> |                                                                                     |  |  |  |  |  |  |
|           |                                                                                  |                                                                                                                                                                                                                                                                                                          |                                                                                     |  |  |  |  |  |  |
|           |                                                                                  |                                                                                                                                                                                                                                                                                                          |                                                                                     |  |  |  |  |  |  |
|           |                                                                                  |                                                                                                                                                                                                                                                                                                          |                                                                                     |  |  |  |  |  |  |
| <b>13</b> | Other financial or non-financial interests                                       | <input checked="" type="checkbox"/> <b>None</b><br><table border="1" style="width: 100%; border-collapse: collapse;"> <tr><td style="height: 20px;"></td><td style="width: 50%;"></td></tr> <tr><td style="height: 20px;"></td><td></td></tr> <tr><td style="height: 20px;"></td><td></td></tr> </table> |                                                                                     |  |  |  |  |  |  |
|           |                                                                                  |                                                                                                                                                                                                                                                                                                          |                                                                                     |  |  |  |  |  |  |
|           |                                                                                  |                                                                                                                                                                                                                                                                                                          |                                                                                     |  |  |  |  |  |  |
|           |                                                                                  |                                                                                                                                                                                                                                                                                                          |                                                                                     |  |  |  |  |  |  |

**Please place an "X" next to the following statement to indicate your agreement:**

I certify that I have answered every question and have not altered the wording of any of the questions on this form.

## ICMJE DISCLOSURE FORM

**Date:** 9/29/2024

**Your Name:** Jiyun Shi

**Manuscript Title:** 68Ga-MY6349 PET/CT imaging to assess Trop2 expression in multiple types of cancer

**Manuscript Number (if known):** 185408-JCI-CMED-RV-2

In the interest of transparency, we ask you to disclose all relationships/activities/interests listed below that are related to the content of your manuscript. "Related" means any relation with for-profit or not-for-profit third parties whose interests may be affected by the content of the manuscript. Disclosure represents a commitment to transparency and does not necessarily indicate a bias. If you are in doubt about whether to list a relationship/activity/interest, it is preferable that you do so.

The author's relationships/activities/interests should be defined broadly. For example, if your manuscript pertains to the epidemiology of hypertension, you should declare all relationships with manufacturers of antihypertensive medication, even if that medication is not mentioned in the manuscript.

In item #1 below, report all support for the work reported in this manuscript without time limit. For all other items, the time frame for disclosure is the past 36 months.

|                                                           |                                                                                                                                                                                | Name all entities with whom you have this relationship or indicate none (add rows as needed)                                                                                                                                                                   | Specifications/Comments (e.g., if payments were made to you or to your institution) |  |  |  |  |  |                                                                                                                                                                                                                                                                                                                      |  |  |  |  |  |  |
|-----------------------------------------------------------|--------------------------------------------------------------------------------------------------------------------------------------------------------------------------------|----------------------------------------------------------------------------------------------------------------------------------------------------------------------------------------------------------------------------------------------------------------|-------------------------------------------------------------------------------------|--|--|--|--|--|----------------------------------------------------------------------------------------------------------------------------------------------------------------------------------------------------------------------------------------------------------------------------------------------------------------------|--|--|--|--|--|--|
| <b>Time frame: Since the initial planning of the work</b> |                                                                                                                                                                                |                                                                                                                                                                                                                                                                |                                                                                     |  |  |  |  |  |                                                                                                                                                                                                                                                                                                                      |  |  |  |  |  |  |
| <b>1</b>                                                  | All support for the present manuscript (e.g., funding, provision of study materials, medical writing, article processing charges, etc.)<br><b>No time limit for this item.</b> | <input checked="" type="checkbox"/> <b>None</b><br><table border="1" style="width: 100%; height: 40px; margin-top: 5px;"> <tr><td style="width: 50%;"></td><td style="width: 50%;"></td></tr> <tr><td></td><td></td></tr> <tr><td></td><td></td></tr> </table> |                                                                                     |  |  |  |  |  | <table border="1" style="width: 100%; height: 40px; margin-top: 5px;"> <tr><td style="width: 50%;"></td><td style="width: 50%;"></td></tr> <tr><td></td><td></td></tr> <tr><td></td><td></td></tr> </table> <p style="font-size: small; color: gray; margin-top: 5px;">Click the tab key to add additional rows.</p> |  |  |  |  |  |  |
|                                                           |                                                                                                                                                                                |                                                                                                                                                                                                                                                                |                                                                                     |  |  |  |  |  |                                                                                                                                                                                                                                                                                                                      |  |  |  |  |  |  |
|                                                           |                                                                                                                                                                                |                                                                                                                                                                                                                                                                |                                                                                     |  |  |  |  |  |                                                                                                                                                                                                                                                                                                                      |  |  |  |  |  |  |
|                                                           |                                                                                                                                                                                |                                                                                                                                                                                                                                                                |                                                                                     |  |  |  |  |  |                                                                                                                                                                                                                                                                                                                      |  |  |  |  |  |  |
|                                                           |                                                                                                                                                                                |                                                                                                                                                                                                                                                                |                                                                                     |  |  |  |  |  |                                                                                                                                                                                                                                                                                                                      |  |  |  |  |  |  |
|                                                           |                                                                                                                                                                                |                                                                                                                                                                                                                                                                |                                                                                     |  |  |  |  |  |                                                                                                                                                                                                                                                                                                                      |  |  |  |  |  |  |
|                                                           |                                                                                                                                                                                |                                                                                                                                                                                                                                                                |                                                                                     |  |  |  |  |  |                                                                                                                                                                                                                                                                                                                      |  |  |  |  |  |  |
| <b>Time frame: past 36 months</b>                         |                                                                                                                                                                                |                                                                                                                                                                                                                                                                |                                                                                     |  |  |  |  |  |                                                                                                                                                                                                                                                                                                                      |  |  |  |  |  |  |
| <b>2</b>                                                  | Grants or contracts from any entity (if not indicated in item #1 above).                                                                                                       | <input checked="" type="checkbox"/> <b>None</b><br><table border="1" style="width: 100%; height: 40px; margin-top: 5px;"> <tr><td style="width: 50%;"></td><td style="width: 50%;"></td></tr> <tr><td></td><td></td></tr> <tr><td></td><td></td></tr> </table> |                                                                                     |  |  |  |  |  | <table border="1" style="width: 100%; height: 40px; margin-top: 5px;"> <tr><td style="width: 50%;"></td><td style="width: 50%;"></td></tr> <tr><td></td><td></td></tr> <tr><td></td><td></td></tr> </table>                                                                                                          |  |  |  |  |  |  |
|                                                           |                                                                                                                                                                                |                                                                                                                                                                                                                                                                |                                                                                     |  |  |  |  |  |                                                                                                                                                                                                                                                                                                                      |  |  |  |  |  |  |
|                                                           |                                                                                                                                                                                |                                                                                                                                                                                                                                                                |                                                                                     |  |  |  |  |  |                                                                                                                                                                                                                                                                                                                      |  |  |  |  |  |  |
|                                                           |                                                                                                                                                                                |                                                                                                                                                                                                                                                                |                                                                                     |  |  |  |  |  |                                                                                                                                                                                                                                                                                                                      |  |  |  |  |  |  |
|                                                           |                                                                                                                                                                                |                                                                                                                                                                                                                                                                |                                                                                     |  |  |  |  |  |                                                                                                                                                                                                                                                                                                                      |  |  |  |  |  |  |
|                                                           |                                                                                                                                                                                |                                                                                                                                                                                                                                                                |                                                                                     |  |  |  |  |  |                                                                                                                                                                                                                                                                                                                      |  |  |  |  |  |  |
|                                                           |                                                                                                                                                                                |                                                                                                                                                                                                                                                                |                                                                                     |  |  |  |  |  |                                                                                                                                                                                                                                                                                                                      |  |  |  |  |  |  |
| <b>3</b>                                                  | Royalties or licenses                                                                                                                                                          | <input checked="" type="checkbox"/> <b>None</b><br><table border="1" style="width: 100%; height: 40px; margin-top: 5px;"> <tr><td style="width: 50%;"></td><td style="width: 50%;"></td></tr> <tr><td></td><td></td></tr> <tr><td></td><td></td></tr> </table> |                                                                                     |  |  |  |  |  | <table border="1" style="width: 100%; height: 40px; margin-top: 5px;"> <tr><td style="width: 50%;"></td><td style="width: 50%;"></td></tr> <tr><td></td><td></td></tr> <tr><td></td><td></td></tr> </table>                                                                                                          |  |  |  |  |  |  |
|                                                           |                                                                                                                                                                                |                                                                                                                                                                                                                                                                |                                                                                     |  |  |  |  |  |                                                                                                                                                                                                                                                                                                                      |  |  |  |  |  |  |
|                                                           |                                                                                                                                                                                |                                                                                                                                                                                                                                                                |                                                                                     |  |  |  |  |  |                                                                                                                                                                                                                                                                                                                      |  |  |  |  |  |  |
|                                                           |                                                                                                                                                                                |                                                                                                                                                                                                                                                                |                                                                                     |  |  |  |  |  |                                                                                                                                                                                                                                                                                                                      |  |  |  |  |  |  |
|                                                           |                                                                                                                                                                                |                                                                                                                                                                                                                                                                |                                                                                     |  |  |  |  |  |                                                                                                                                                                                                                                                                                                                      |  |  |  |  |  |  |
|                                                           |                                                                                                                                                                                |                                                                                                                                                                                                                                                                |                                                                                     |  |  |  |  |  |                                                                                                                                                                                                                                                                                                                      |  |  |  |  |  |  |
|                                                           |                                                                                                                                                                                |                                                                                                                                                                                                                                                                |                                                                                     |  |  |  |  |  |                                                                                                                                                                                                                                                                                                                      |  |  |  |  |  |  |

|    |                                                                                                              | Name all entities with whom you have this relationship or indicate none (add rows as needed)                                                                                                                                                                                                                                                                                                                                                           | Specifications/Comments (e.g., if payments were made to you or to your institution) |  |  |  |  |  |  |  |  |
|----|--------------------------------------------------------------------------------------------------------------|--------------------------------------------------------------------------------------------------------------------------------------------------------------------------------------------------------------------------------------------------------------------------------------------------------------------------------------------------------------------------------------------------------------------------------------------------------|-------------------------------------------------------------------------------------|--|--|--|--|--|--|--|--|
| 4  | Consulting fees                                                                                              | <input checked="" type="checkbox"/> <b>None</b><br><table border="1" style="width: 100%; border-collapse: collapse;"> <tr><td style="width: 50%; height: 20px;"></td><td style="width: 50%; height: 20px;"></td></tr> <tr><td style="height: 20px;"></td><td style="height: 20px;"></td></tr> <tr><td style="height: 20px;"></td><td style="height: 20px;"></td></tr> <tr><td style="height: 20px;"></td><td style="height: 20px;"></td></tr> </table> |                                                                                     |  |  |  |  |  |  |  |  |
|    |                                                                                                              |                                                                                                                                                                                                                                                                                                                                                                                                                                                        |                                                                                     |  |  |  |  |  |  |  |  |
|    |                                                                                                              |                                                                                                                                                                                                                                                                                                                                                                                                                                                        |                                                                                     |  |  |  |  |  |  |  |  |
|    |                                                                                                              |                                                                                                                                                                                                                                                                                                                                                                                                                                                        |                                                                                     |  |  |  |  |  |  |  |  |
|    |                                                                                                              |                                                                                                                                                                                                                                                                                                                                                                                                                                                        |                                                                                     |  |  |  |  |  |  |  |  |
| 5  | Payment or honoraria for lectures, presentations, speakers bureaus, manuscript writing or educational events | <input checked="" type="checkbox"/> <b>None</b><br><table border="1" style="width: 100%; border-collapse: collapse;"> <tr><td style="width: 50%; height: 20px;"></td><td style="width: 50%; height: 20px;"></td></tr> <tr><td style="height: 20px;"></td><td style="height: 20px;"></td></tr> <tr><td style="height: 20px;"></td><td style="height: 20px;"></td></tr> </table>                                                                         |                                                                                     |  |  |  |  |  |  |  |  |
|    |                                                                                                              |                                                                                                                                                                                                                                                                                                                                                                                                                                                        |                                                                                     |  |  |  |  |  |  |  |  |
|    |                                                                                                              |                                                                                                                                                                                                                                                                                                                                                                                                                                                        |                                                                                     |  |  |  |  |  |  |  |  |
|    |                                                                                                              |                                                                                                                                                                                                                                                                                                                                                                                                                                                        |                                                                                     |  |  |  |  |  |  |  |  |
| 6  | Payment for expert testimony                                                                                 | <input checked="" type="checkbox"/> <b>None</b><br><table border="1" style="width: 100%; border-collapse: collapse;"> <tr><td style="width: 50%; height: 20px;"></td><td style="width: 50%; height: 20px;"></td></tr> <tr><td style="height: 20px;"></td><td style="height: 20px;"></td></tr> <tr><td style="height: 20px;"></td><td style="height: 20px;"></td></tr> </table>                                                                         |                                                                                     |  |  |  |  |  |  |  |  |
|    |                                                                                                              |                                                                                                                                                                                                                                                                                                                                                                                                                                                        |                                                                                     |  |  |  |  |  |  |  |  |
|    |                                                                                                              |                                                                                                                                                                                                                                                                                                                                                                                                                                                        |                                                                                     |  |  |  |  |  |  |  |  |
|    |                                                                                                              |                                                                                                                                                                                                                                                                                                                                                                                                                                                        |                                                                                     |  |  |  |  |  |  |  |  |
| 7  | Support for attending meetings and/or travel                                                                 | <input checked="" type="checkbox"/> <b>None</b><br><table border="1" style="width: 100%; border-collapse: collapse;"> <tr><td style="width: 50%; height: 20px;"></td><td style="width: 50%; height: 20px;"></td></tr> <tr><td style="height: 20px;"></td><td style="height: 20px;"></td></tr> <tr><td style="height: 20px;"></td><td style="height: 20px;"></td></tr> </table>                                                                         |                                                                                     |  |  |  |  |  |  |  |  |
|    |                                                                                                              |                                                                                                                                                                                                                                                                                                                                                                                                                                                        |                                                                                     |  |  |  |  |  |  |  |  |
|    |                                                                                                              |                                                                                                                                                                                                                                                                                                                                                                                                                                                        |                                                                                     |  |  |  |  |  |  |  |  |
|    |                                                                                                              |                                                                                                                                                                                                                                                                                                                                                                                                                                                        |                                                                                     |  |  |  |  |  |  |  |  |
| 8  | Patents planned, issued or pending                                                                           | <input checked="" type="checkbox"/> <b>None</b><br><table border="1" style="width: 100%; border-collapse: collapse;"> <tr><td style="width: 50%; height: 20px;"></td><td style="width: 50%; height: 20px;"></td></tr> <tr><td style="height: 20px;"></td><td style="height: 20px;"></td></tr> <tr><td style="height: 20px;"></td><td style="height: 20px;"></td></tr> </table>                                                                         |                                                                                     |  |  |  |  |  |  |  |  |
|    |                                                                                                              |                                                                                                                                                                                                                                                                                                                                                                                                                                                        |                                                                                     |  |  |  |  |  |  |  |  |
|    |                                                                                                              |                                                                                                                                                                                                                                                                                                                                                                                                                                                        |                                                                                     |  |  |  |  |  |  |  |  |
|    |                                                                                                              |                                                                                                                                                                                                                                                                                                                                                                                                                                                        |                                                                                     |  |  |  |  |  |  |  |  |
| 9  | Participation on a Data Safety Monitoring Board or Advisory Board                                            | <input checked="" type="checkbox"/> <b>None</b><br><table border="1" style="width: 100%; border-collapse: collapse;"> <tr><td style="width: 50%; height: 20px;"></td><td style="width: 50%; height: 20px;"></td></tr> <tr><td style="height: 20px;"></td><td style="height: 20px;"></td></tr> <tr><td style="height: 20px;"></td><td style="height: 20px;"></td></tr> </table>                                                                         |                                                                                     |  |  |  |  |  |  |  |  |
|    |                                                                                                              |                                                                                                                                                                                                                                                                                                                                                                                                                                                        |                                                                                     |  |  |  |  |  |  |  |  |
|    |                                                                                                              |                                                                                                                                                                                                                                                                                                                                                                                                                                                        |                                                                                     |  |  |  |  |  |  |  |  |
|    |                                                                                                              |                                                                                                                                                                                                                                                                                                                                                                                                                                                        |                                                                                     |  |  |  |  |  |  |  |  |
| 10 | Leadership or fiduciary role in other board, society, committee or advocacy group, paid or unpaid            | <input checked="" type="checkbox"/> <b>None</b><br><table border="1" style="width: 100%; border-collapse: collapse;"> <tr><td style="width: 50%; height: 20px;"></td><td style="width: 50%; height: 20px;"></td></tr> <tr><td style="height: 20px;"></td><td style="height: 20px;"></td></tr> <tr><td style="height: 20px;"></td><td style="height: 20px;"></td></tr> </table>                                                                         |                                                                                     |  |  |  |  |  |  |  |  |
|    |                                                                                                              |                                                                                                                                                                                                                                                                                                                                                                                                                                                        |                                                                                     |  |  |  |  |  |  |  |  |
|    |                                                                                                              |                                                                                                                                                                                                                                                                                                                                                                                                                                                        |                                                                                     |  |  |  |  |  |  |  |  |
|    |                                                                                                              |                                                                                                                                                                                                                                                                                                                                                                                                                                                        |                                                                                     |  |  |  |  |  |  |  |  |

|           |                                                                                  | Name all entities with whom you have this relationship or indicate none (add rows as needed)                                                                                                                                                                                                             | Specifications/Comments (e.g., if payments were made to you or to your institution) |  |  |  |  |  |  |
|-----------|----------------------------------------------------------------------------------|----------------------------------------------------------------------------------------------------------------------------------------------------------------------------------------------------------------------------------------------------------------------------------------------------------|-------------------------------------------------------------------------------------|--|--|--|--|--|--|
| <b>11</b> | Stock or stock options                                                           | <input checked="" type="checkbox"/> <b>None</b><br><table border="1" style="width: 100%; border-collapse: collapse;"> <tr><td style="height: 20px;"></td><td style="width: 50%;"></td></tr> <tr><td style="height: 20px;"></td><td></td></tr> <tr><td style="height: 20px;"></td><td></td></tr> </table> |                                                                                     |  |  |  |  |  |  |
|           |                                                                                  |                                                                                                                                                                                                                                                                                                          |                                                                                     |  |  |  |  |  |  |
|           |                                                                                  |                                                                                                                                                                                                                                                                                                          |                                                                                     |  |  |  |  |  |  |
|           |                                                                                  |                                                                                                                                                                                                                                                                                                          |                                                                                     |  |  |  |  |  |  |
| <b>12</b> | Receipt of equipment, materials, drugs, medical writing, gifts or other services | <input checked="" type="checkbox"/> <b>None</b><br><table border="1" style="width: 100%; border-collapse: collapse;"> <tr><td style="height: 20px;"></td><td style="width: 50%;"></td></tr> <tr><td style="height: 20px;"></td><td></td></tr> <tr><td style="height: 20px;"></td><td></td></tr> </table> |                                                                                     |  |  |  |  |  |  |
|           |                                                                                  |                                                                                                                                                                                                                                                                                                          |                                                                                     |  |  |  |  |  |  |
|           |                                                                                  |                                                                                                                                                                                                                                                                                                          |                                                                                     |  |  |  |  |  |  |
|           |                                                                                  |                                                                                                                                                                                                                                                                                                          |                                                                                     |  |  |  |  |  |  |
| <b>13</b> | Other financial or non-financial interests                                       | <input checked="" type="checkbox"/> <b>None</b><br><table border="1" style="width: 100%; border-collapse: collapse;"> <tr><td style="height: 20px;"></td><td style="width: 50%;"></td></tr> <tr><td style="height: 20px;"></td><td></td></tr> <tr><td style="height: 20px;"></td><td></td></tr> </table> |                                                                                     |  |  |  |  |  |  |
|           |                                                                                  |                                                                                                                                                                                                                                                                                                          |                                                                                     |  |  |  |  |  |  |
|           |                                                                                  |                                                                                                                                                                                                                                                                                                          |                                                                                     |  |  |  |  |  |  |
|           |                                                                                  |                                                                                                                                                                                                                                                                                                          |                                                                                     |  |  |  |  |  |  |

**Please place an "X" next to the following statement to indicate your agreement:**

I certify that I have answered every question and have not altered the wording of any of the questions on this form.

# ICMJE DISCLOSURE FORM

**Date:** 9/29/2024

**Your Name:** Hannan Gao

**Manuscript Title:** 68Ga-MY6349 PET/CT imaging to assess Trop2 expression in multiple types of cancer

**Manuscript Number (if known):** 185408-JCI-CMED-RV-2

In the interest of transparency, we ask you to disclose all relationships/activities/interests listed below that are related to the content of your manuscript. "Related" means any relation with for-profit or not-for-profit third parties whose interests may be affected by the content of the manuscript. Disclosure represents a commitment to transparency and does not necessarily indicate a bias. If you are in doubt about whether to list a relationship/activity/interest, it is preferable that you do so.

The author's relationships/activities/interests should be defined broadly. For example, if your manuscript pertains to the epidemiology of hypertension, you should declare all relationships with manufacturers of antihypertensive medication, even if that medication is not mentioned in the manuscript.

In item #1 below, report all support for the work reported in this manuscript without time limit. For all other items, the time frame for disclosure is the past 36 months.

|                                                           |                                                                                                                                                                                | Name all entities with whom you have this relationship or indicate none (add rows as needed)                                                                                                                                               | Specifications/Comments (e.g., if payments were made to you or to your institution) |  |  |  |  |  |                                                                                                                                                           |
|-----------------------------------------------------------|--------------------------------------------------------------------------------------------------------------------------------------------------------------------------------|--------------------------------------------------------------------------------------------------------------------------------------------------------------------------------------------------------------------------------------------|-------------------------------------------------------------------------------------|--|--|--|--|--|-----------------------------------------------------------------------------------------------------------------------------------------------------------|
| <b>Time frame: Since the initial planning of the work</b> |                                                                                                                                                                                |                                                                                                                                                                                                                                            |                                                                                     |  |  |  |  |  |                                                                                                                                                           |
| <b>1</b>                                                  | All support for the present manuscript (e.g., funding, provision of study materials, medical writing, article processing charges, etc.)<br><b>No time limit for this item.</b> | <input checked="" type="checkbox"/> <b>None</b><br><table border="1" style="width: 100%; height: 40px; margin-top: 5px;"> <tr><td style="width: 60%;"></td><td></td></tr> <tr><td></td><td></td></tr> <tr><td></td><td></td></tr> </table> |                                                                                     |  |  |  |  |  | <div style="border: 1px solid #ccc; padding: 2px; font-size: small; text-align: center; margin-top: 5px;">Click the tab key to add additional rows.</div> |
|                                                           |                                                                                                                                                                                |                                                                                                                                                                                                                                            |                                                                                     |  |  |  |  |  |                                                                                                                                                           |
|                                                           |                                                                                                                                                                                |                                                                                                                                                                                                                                            |                                                                                     |  |  |  |  |  |                                                                                                                                                           |
|                                                           |                                                                                                                                                                                |                                                                                                                                                                                                                                            |                                                                                     |  |  |  |  |  |                                                                                                                                                           |
| <b>Time frame: past 36 months</b>                         |                                                                                                                                                                                |                                                                                                                                                                                                                                            |                                                                                     |  |  |  |  |  |                                                                                                                                                           |
| <b>2</b>                                                  | Grants or contracts from any entity (if not indicated in item #1 above).                                                                                                       | <input checked="" type="checkbox"/> <b>None</b><br><table border="1" style="width: 100%; height: 40px; margin-top: 5px;"> <tr><td style="width: 60%;"></td><td></td></tr> <tr><td></td><td></td></tr> <tr><td></td><td></td></tr> </table> |                                                                                     |  |  |  |  |  |                                                                                                                                                           |
|                                                           |                                                                                                                                                                                |                                                                                                                                                                                                                                            |                                                                                     |  |  |  |  |  |                                                                                                                                                           |
|                                                           |                                                                                                                                                                                |                                                                                                                                                                                                                                            |                                                                                     |  |  |  |  |  |                                                                                                                                                           |
|                                                           |                                                                                                                                                                                |                                                                                                                                                                                                                                            |                                                                                     |  |  |  |  |  |                                                                                                                                                           |
| <b>3</b>                                                  | Royalties or licenses                                                                                                                                                          | <input checked="" type="checkbox"/> <b>None</b><br><table border="1" style="width: 100%; height: 40px; margin-top: 5px;"> <tr><td style="width: 60%;"></td><td></td></tr> <tr><td></td><td></td></tr> <tr><td></td><td></td></tr> </table> |                                                                                     |  |  |  |  |  |                                                                                                                                                           |
|                                                           |                                                                                                                                                                                |                                                                                                                                                                                                                                            |                                                                                     |  |  |  |  |  |                                                                                                                                                           |
|                                                           |                                                                                                                                                                                |                                                                                                                                                                                                                                            |                                                                                     |  |  |  |  |  |                                                                                                                                                           |
|                                                           |                                                                                                                                                                                |                                                                                                                                                                                                                                            |                                                                                     |  |  |  |  |  |                                                                                                                                                           |

|    |                                                                                                              | Name all entities with whom you have this relationship or indicate none (add rows as needed)                                                                                                                                                                                                                                                                           | Specifications/Comments (e.g., if payments were made to you or to your institution) |  |  |  |  |  |  |  |  |
|----|--------------------------------------------------------------------------------------------------------------|------------------------------------------------------------------------------------------------------------------------------------------------------------------------------------------------------------------------------------------------------------------------------------------------------------------------------------------------------------------------|-------------------------------------------------------------------------------------|--|--|--|--|--|--|--|--|
| 4  | Consulting fees                                                                                              | <input checked="" type="checkbox"/> <b>None</b><br><table border="1" style="width: 100%; border-collapse: collapse;"> <tr><td style="width: 50%; height: 20px;"></td><td style="width: 50%;"></td></tr> <tr><td style="height: 20px;"></td><td></td></tr> <tr><td style="height: 20px;"></td><td></td></tr> <tr><td style="height: 20px;"></td><td></td></tr> </table> |                                                                                     |  |  |  |  |  |  |  |  |
|    |                                                                                                              |                                                                                                                                                                                                                                                                                                                                                                        |                                                                                     |  |  |  |  |  |  |  |  |
|    |                                                                                                              |                                                                                                                                                                                                                                                                                                                                                                        |                                                                                     |  |  |  |  |  |  |  |  |
|    |                                                                                                              |                                                                                                                                                                                                                                                                                                                                                                        |                                                                                     |  |  |  |  |  |  |  |  |
|    |                                                                                                              |                                                                                                                                                                                                                                                                                                                                                                        |                                                                                     |  |  |  |  |  |  |  |  |
| 5  | Payment or honoraria for lectures, presentations, speakers bureaus, manuscript writing or educational events | <input checked="" type="checkbox"/> <b>None</b><br><table border="1" style="width: 100%; border-collapse: collapse;"> <tr><td style="width: 50%; height: 20px;"></td><td style="width: 50%;"></td></tr> <tr><td style="height: 20px;"></td><td></td></tr> <tr><td style="height: 20px;"></td><td></td></tr> </table>                                                   |                                                                                     |  |  |  |  |  |  |  |  |
|    |                                                                                                              |                                                                                                                                                                                                                                                                                                                                                                        |                                                                                     |  |  |  |  |  |  |  |  |
|    |                                                                                                              |                                                                                                                                                                                                                                                                                                                                                                        |                                                                                     |  |  |  |  |  |  |  |  |
|    |                                                                                                              |                                                                                                                                                                                                                                                                                                                                                                        |                                                                                     |  |  |  |  |  |  |  |  |
| 6  | Payment for expert testimony                                                                                 | <input checked="" type="checkbox"/> <b>None</b><br><table border="1" style="width: 100%; border-collapse: collapse;"> <tr><td style="width: 50%; height: 20px;"></td><td style="width: 50%;"></td></tr> <tr><td style="height: 20px;"></td><td></td></tr> <tr><td style="height: 20px;"></td><td></td></tr> </table>                                                   |                                                                                     |  |  |  |  |  |  |  |  |
|    |                                                                                                              |                                                                                                                                                                                                                                                                                                                                                                        |                                                                                     |  |  |  |  |  |  |  |  |
|    |                                                                                                              |                                                                                                                                                                                                                                                                                                                                                                        |                                                                                     |  |  |  |  |  |  |  |  |
|    |                                                                                                              |                                                                                                                                                                                                                                                                                                                                                                        |                                                                                     |  |  |  |  |  |  |  |  |
| 7  | Support for attending meetings and/or travel                                                                 | <input checked="" type="checkbox"/> <b>None</b><br><table border="1" style="width: 100%; border-collapse: collapse;"> <tr><td style="width: 50%; height: 20px;"></td><td style="width: 50%;"></td></tr> <tr><td style="height: 20px;"></td><td></td></tr> <tr><td style="height: 20px;"></td><td></td></tr> </table>                                                   |                                                                                     |  |  |  |  |  |  |  |  |
|    |                                                                                                              |                                                                                                                                                                                                                                                                                                                                                                        |                                                                                     |  |  |  |  |  |  |  |  |
|    |                                                                                                              |                                                                                                                                                                                                                                                                                                                                                                        |                                                                                     |  |  |  |  |  |  |  |  |
|    |                                                                                                              |                                                                                                                                                                                                                                                                                                                                                                        |                                                                                     |  |  |  |  |  |  |  |  |
| 8  | Patents planned, issued or pending                                                                           | <input checked="" type="checkbox"/> <b>None</b><br><table border="1" style="width: 100%; border-collapse: collapse;"> <tr><td style="width: 50%; height: 20px;"></td><td style="width: 50%;"></td></tr> <tr><td style="height: 20px;"></td><td></td></tr> <tr><td style="height: 20px;"></td><td></td></tr> </table>                                                   |                                                                                     |  |  |  |  |  |  |  |  |
|    |                                                                                                              |                                                                                                                                                                                                                                                                                                                                                                        |                                                                                     |  |  |  |  |  |  |  |  |
|    |                                                                                                              |                                                                                                                                                                                                                                                                                                                                                                        |                                                                                     |  |  |  |  |  |  |  |  |
|    |                                                                                                              |                                                                                                                                                                                                                                                                                                                                                                        |                                                                                     |  |  |  |  |  |  |  |  |
| 9  | Participation on a Data Safety Monitoring Board or Advisory Board                                            | <input checked="" type="checkbox"/> <b>None</b><br><table border="1" style="width: 100%; border-collapse: collapse;"> <tr><td style="width: 50%; height: 20px;"></td><td style="width: 50%;"></td></tr> <tr><td style="height: 20px;"></td><td></td></tr> <tr><td style="height: 20px;"></td><td></td></tr> </table>                                                   |                                                                                     |  |  |  |  |  |  |  |  |
|    |                                                                                                              |                                                                                                                                                                                                                                                                                                                                                                        |                                                                                     |  |  |  |  |  |  |  |  |
|    |                                                                                                              |                                                                                                                                                                                                                                                                                                                                                                        |                                                                                     |  |  |  |  |  |  |  |  |
|    |                                                                                                              |                                                                                                                                                                                                                                                                                                                                                                        |                                                                                     |  |  |  |  |  |  |  |  |
| 10 | Leadership or fiduciary role in other board, society, committee or advocacy group, paid or unpaid            | <input checked="" type="checkbox"/> <b>None</b><br><table border="1" style="width: 100%; border-collapse: collapse;"> <tr><td style="width: 50%; height: 20px;"></td><td style="width: 50%;"></td></tr> <tr><td style="height: 20px;"></td><td></td></tr> <tr><td style="height: 20px;"></td><td></td></tr> </table>                                                   |                                                                                     |  |  |  |  |  |  |  |  |
|    |                                                                                                              |                                                                                                                                                                                                                                                                                                                                                                        |                                                                                     |  |  |  |  |  |  |  |  |
|    |                                                                                                              |                                                                                                                                                                                                                                                                                                                                                                        |                                                                                     |  |  |  |  |  |  |  |  |
|    |                                                                                                              |                                                                                                                                                                                                                                                                                                                                                                        |                                                                                     |  |  |  |  |  |  |  |  |

|           |                                                                                  | Name all entities with whom you have this relationship or indicate none (add rows as needed)                                                                                                                                                                                                             | Specifications/Comments (e.g., if payments were made to you or to your institution) |  |  |  |  |  |  |
|-----------|----------------------------------------------------------------------------------|----------------------------------------------------------------------------------------------------------------------------------------------------------------------------------------------------------------------------------------------------------------------------------------------------------|-------------------------------------------------------------------------------------|--|--|--|--|--|--|
| <b>11</b> | Stock or stock options                                                           | <input checked="" type="checkbox"/> <b>None</b><br><table border="1" style="width: 100%; border-collapse: collapse;"> <tr><td style="height: 20px;"></td><td style="width: 50%;"></td></tr> <tr><td style="height: 20px;"></td><td></td></tr> <tr><td style="height: 20px;"></td><td></td></tr> </table> |                                                                                     |  |  |  |  |  |  |
|           |                                                                                  |                                                                                                                                                                                                                                                                                                          |                                                                                     |  |  |  |  |  |  |
|           |                                                                                  |                                                                                                                                                                                                                                                                                                          |                                                                                     |  |  |  |  |  |  |
|           |                                                                                  |                                                                                                                                                                                                                                                                                                          |                                                                                     |  |  |  |  |  |  |
| <b>12</b> | Receipt of equipment, materials, drugs, medical writing, gifts or other services | <input checked="" type="checkbox"/> <b>None</b><br><table border="1" style="width: 100%; border-collapse: collapse;"> <tr><td style="height: 20px;"></td><td style="width: 50%;"></td></tr> <tr><td style="height: 20px;"></td><td></td></tr> <tr><td style="height: 20px;"></td><td></td></tr> </table> |                                                                                     |  |  |  |  |  |  |
|           |                                                                                  |                                                                                                                                                                                                                                                                                                          |                                                                                     |  |  |  |  |  |  |
|           |                                                                                  |                                                                                                                                                                                                                                                                                                          |                                                                                     |  |  |  |  |  |  |
|           |                                                                                  |                                                                                                                                                                                                                                                                                                          |                                                                                     |  |  |  |  |  |  |
| <b>13</b> | Other financial or non-financial interests                                       | <input checked="" type="checkbox"/> <b>None</b><br><table border="1" style="width: 100%; border-collapse: collapse;"> <tr><td style="height: 20px;"></td><td style="width: 50%;"></td></tr> <tr><td style="height: 20px;"></td><td></td></tr> <tr><td style="height: 20px;"></td><td></td></tr> </table> |                                                                                     |  |  |  |  |  |  |
|           |                                                                                  |                                                                                                                                                                                                                                                                                                          |                                                                                     |  |  |  |  |  |  |
|           |                                                                                  |                                                                                                                                                                                                                                                                                                          |                                                                                     |  |  |  |  |  |  |
|           |                                                                                  |                                                                                                                                                                                                                                                                                                          |                                                                                     |  |  |  |  |  |  |

**Please place an "X" next to the following statement to indicate your agreement:**

I certify that I have answered every question and have not altered the wording of any of the questions on this form.

# ICMJE DISCLOSURE FORM

**Date:** 9/29/2024

**Your Name:** Yining Sun

**Manuscript Title:** 68Ga-MY6349 PET/CT imaging to assess Trop2 expression in multiple types of cancer

**Manuscript Number (if known):** 185408-JCI-CMED-RV-2

In the interest of transparency, we ask you to disclose all relationships/activities/interests listed below that are related to the content of your manuscript. "Related" means any relation with for-profit or not-for-profit third parties whose interests may be affected by the content of the manuscript. Disclosure represents a commitment to transparency and does not necessarily indicate a bias. If you are in doubt about whether to list a relationship/activity/interest, it is preferable that you do so.

The author's relationships/activities/interests should be defined broadly. For example, if your manuscript pertains to the epidemiology of hypertension, you should declare all relationships with manufacturers of antihypertensive medication, even if that medication is not mentioned in the manuscript.

In item #1 below, report all support for the work reported in this manuscript without time limit. For all other items, the time frame for disclosure is the past 36 months.

|                                                           |                                                                                                                                                                                | Name all entities with whom you have this relationship or indicate none (add rows as needed)                                                                                                                                                                   | Specifications/Comments (e.g., if payments were made to you or to your institution) |  |  |  |  |  |                                                                                                                                           |
|-----------------------------------------------------------|--------------------------------------------------------------------------------------------------------------------------------------------------------------------------------|----------------------------------------------------------------------------------------------------------------------------------------------------------------------------------------------------------------------------------------------------------------|-------------------------------------------------------------------------------------|--|--|--|--|--|-------------------------------------------------------------------------------------------------------------------------------------------|
| <b>Time frame: Since the initial planning of the work</b> |                                                                                                                                                                                |                                                                                                                                                                                                                                                                |                                                                                     |  |  |  |  |  |                                                                                                                                           |
| <b>1</b>                                                  | All support for the present manuscript (e.g., funding, provision of study materials, medical writing, article processing charges, etc.)<br><b>No time limit for this item.</b> | <input checked="" type="checkbox"/> <b>None</b><br><table border="1" style="width: 100%; height: 40px; margin-top: 5px;"> <tr><td style="width: 60%;"></td><td style="width: 40%;"></td></tr> <tr><td></td><td></td></tr> <tr><td></td><td></td></tr> </table> |                                                                                     |  |  |  |  |  | <div style="border: 1px solid black; padding: 2px; font-size: small; text-align: center;">Click the tab key to add additional rows.</div> |
|                                                           |                                                                                                                                                                                |                                                                                                                                                                                                                                                                |                                                                                     |  |  |  |  |  |                                                                                                                                           |
|                                                           |                                                                                                                                                                                |                                                                                                                                                                                                                                                                |                                                                                     |  |  |  |  |  |                                                                                                                                           |
|                                                           |                                                                                                                                                                                |                                                                                                                                                                                                                                                                |                                                                                     |  |  |  |  |  |                                                                                                                                           |
| <b>Time frame: past 36 months</b>                         |                                                                                                                                                                                |                                                                                                                                                                                                                                                                |                                                                                     |  |  |  |  |  |                                                                                                                                           |
| <b>2</b>                                                  | Grants or contracts from any entity (if not indicated in item #1 above).                                                                                                       | <input checked="" type="checkbox"/> <b>None</b><br><table border="1" style="width: 100%; height: 40px; margin-top: 5px;"> <tr><td style="width: 60%;"></td><td style="width: 40%;"></td></tr> <tr><td></td><td></td></tr> <tr><td></td><td></td></tr> </table> |                                                                                     |  |  |  |  |  |                                                                                                                                           |
|                                                           |                                                                                                                                                                                |                                                                                                                                                                                                                                                                |                                                                                     |  |  |  |  |  |                                                                                                                                           |
|                                                           |                                                                                                                                                                                |                                                                                                                                                                                                                                                                |                                                                                     |  |  |  |  |  |                                                                                                                                           |
|                                                           |                                                                                                                                                                                |                                                                                                                                                                                                                                                                |                                                                                     |  |  |  |  |  |                                                                                                                                           |
| <b>3</b>                                                  | Royalties or licenses                                                                                                                                                          | <input checked="" type="checkbox"/> <b>None</b><br><table border="1" style="width: 100%; height: 40px; margin-top: 5px;"> <tr><td style="width: 60%;"></td><td style="width: 40%;"></td></tr> <tr><td></td><td></td></tr> <tr><td></td><td></td></tr> </table> |                                                                                     |  |  |  |  |  |                                                                                                                                           |
|                                                           |                                                                                                                                                                                |                                                                                                                                                                                                                                                                |                                                                                     |  |  |  |  |  |                                                                                                                                           |
|                                                           |                                                                                                                                                                                |                                                                                                                                                                                                                                                                |                                                                                     |  |  |  |  |  |                                                                                                                                           |
|                                                           |                                                                                                                                                                                |                                                                                                                                                                                                                                                                |                                                                                     |  |  |  |  |  |                                                                                                                                           |

|    |                                                                                                              | Name all entities with whom you have this relationship or indicate none (add rows as needed)                                                                                                                                                                                                                                                                           | Specifications/Comments (e.g., if payments were made to you or to your institution) |  |  |  |  |  |  |  |  |
|----|--------------------------------------------------------------------------------------------------------------|------------------------------------------------------------------------------------------------------------------------------------------------------------------------------------------------------------------------------------------------------------------------------------------------------------------------------------------------------------------------|-------------------------------------------------------------------------------------|--|--|--|--|--|--|--|--|
| 4  | Consulting fees                                                                                              | <input checked="" type="checkbox"/> <b>None</b><br><table border="1" style="width: 100%; border-collapse: collapse;"> <tr><td style="width: 50%; height: 20px;"></td><td style="width: 50%;"></td></tr> <tr><td style="height: 20px;"></td><td></td></tr> <tr><td style="height: 20px;"></td><td></td></tr> <tr><td style="height: 20px;"></td><td></td></tr> </table> |                                                                                     |  |  |  |  |  |  |  |  |
|    |                                                                                                              |                                                                                                                                                                                                                                                                                                                                                                        |                                                                                     |  |  |  |  |  |  |  |  |
|    |                                                                                                              |                                                                                                                                                                                                                                                                                                                                                                        |                                                                                     |  |  |  |  |  |  |  |  |
|    |                                                                                                              |                                                                                                                                                                                                                                                                                                                                                                        |                                                                                     |  |  |  |  |  |  |  |  |
|    |                                                                                                              |                                                                                                                                                                                                                                                                                                                                                                        |                                                                                     |  |  |  |  |  |  |  |  |
| 5  | Payment or honoraria for lectures, presentations, speakers bureaus, manuscript writing or educational events | <input checked="" type="checkbox"/> <b>None</b><br><table border="1" style="width: 100%; border-collapse: collapse;"> <tr><td style="width: 50%; height: 20px;"></td><td style="width: 50%;"></td></tr> <tr><td style="height: 20px;"></td><td></td></tr> <tr><td style="height: 20px;"></td><td></td></tr> </table>                                                   |                                                                                     |  |  |  |  |  |  |  |  |
|    |                                                                                                              |                                                                                                                                                                                                                                                                                                                                                                        |                                                                                     |  |  |  |  |  |  |  |  |
|    |                                                                                                              |                                                                                                                                                                                                                                                                                                                                                                        |                                                                                     |  |  |  |  |  |  |  |  |
|    |                                                                                                              |                                                                                                                                                                                                                                                                                                                                                                        |                                                                                     |  |  |  |  |  |  |  |  |
| 6  | Payment for expert testimony                                                                                 | <input checked="" type="checkbox"/> <b>None</b><br><table border="1" style="width: 100%; border-collapse: collapse;"> <tr><td style="width: 50%; height: 20px;"></td><td style="width: 50%;"></td></tr> <tr><td style="height: 20px;"></td><td></td></tr> <tr><td style="height: 20px;"></td><td></td></tr> </table>                                                   |                                                                                     |  |  |  |  |  |  |  |  |
|    |                                                                                                              |                                                                                                                                                                                                                                                                                                                                                                        |                                                                                     |  |  |  |  |  |  |  |  |
|    |                                                                                                              |                                                                                                                                                                                                                                                                                                                                                                        |                                                                                     |  |  |  |  |  |  |  |  |
|    |                                                                                                              |                                                                                                                                                                                                                                                                                                                                                                        |                                                                                     |  |  |  |  |  |  |  |  |
| 7  | Support for attending meetings and/or travel                                                                 | <input checked="" type="checkbox"/> <b>None</b><br><table border="1" style="width: 100%; border-collapse: collapse;"> <tr><td style="width: 50%; height: 20px;"></td><td style="width: 50%;"></td></tr> <tr><td style="height: 20px;"></td><td></td></tr> <tr><td style="height: 20px;"></td><td></td></tr> </table>                                                   |                                                                                     |  |  |  |  |  |  |  |  |
|    |                                                                                                              |                                                                                                                                                                                                                                                                                                                                                                        |                                                                                     |  |  |  |  |  |  |  |  |
|    |                                                                                                              |                                                                                                                                                                                                                                                                                                                                                                        |                                                                                     |  |  |  |  |  |  |  |  |
|    |                                                                                                              |                                                                                                                                                                                                                                                                                                                                                                        |                                                                                     |  |  |  |  |  |  |  |  |
| 8  | Patents planned, issued or pending                                                                           | <input checked="" type="checkbox"/> <b>None</b><br><table border="1" style="width: 100%; border-collapse: collapse;"> <tr><td style="width: 50%; height: 20px;"></td><td style="width: 50%;"></td></tr> <tr><td style="height: 20px;"></td><td></td></tr> <tr><td style="height: 20px;"></td><td></td></tr> </table>                                                   |                                                                                     |  |  |  |  |  |  |  |  |
|    |                                                                                                              |                                                                                                                                                                                                                                                                                                                                                                        |                                                                                     |  |  |  |  |  |  |  |  |
|    |                                                                                                              |                                                                                                                                                                                                                                                                                                                                                                        |                                                                                     |  |  |  |  |  |  |  |  |
|    |                                                                                                              |                                                                                                                                                                                                                                                                                                                                                                        |                                                                                     |  |  |  |  |  |  |  |  |
| 9  | Participation on a Data Safety Monitoring Board or Advisory Board                                            | <input checked="" type="checkbox"/> <b>None</b><br><table border="1" style="width: 100%; border-collapse: collapse;"> <tr><td style="width: 50%; height: 20px;"></td><td style="width: 50%;"></td></tr> <tr><td style="height: 20px;"></td><td></td></tr> <tr><td style="height: 20px;"></td><td></td></tr> </table>                                                   |                                                                                     |  |  |  |  |  |  |  |  |
|    |                                                                                                              |                                                                                                                                                                                                                                                                                                                                                                        |                                                                                     |  |  |  |  |  |  |  |  |
|    |                                                                                                              |                                                                                                                                                                                                                                                                                                                                                                        |                                                                                     |  |  |  |  |  |  |  |  |
|    |                                                                                                              |                                                                                                                                                                                                                                                                                                                                                                        |                                                                                     |  |  |  |  |  |  |  |  |
| 10 | Leadership or fiduciary role in other board, society, committee or advocacy group, paid or unpaid            | <input checked="" type="checkbox"/> <b>None</b><br><table border="1" style="width: 100%; border-collapse: collapse;"> <tr><td style="width: 50%; height: 20px;"></td><td style="width: 50%;"></td></tr> <tr><td style="height: 20px;"></td><td></td></tr> <tr><td style="height: 20px;"></td><td></td></tr> </table>                                                   |                                                                                     |  |  |  |  |  |  |  |  |
|    |                                                                                                              |                                                                                                                                                                                                                                                                                                                                                                        |                                                                                     |  |  |  |  |  |  |  |  |
|    |                                                                                                              |                                                                                                                                                                                                                                                                                                                                                                        |                                                                                     |  |  |  |  |  |  |  |  |
|    |                                                                                                              |                                                                                                                                                                                                                                                                                                                                                                        |                                                                                     |  |  |  |  |  |  |  |  |

|           |                                                                                  | Name all entities with whom you have this relationship or indicate none (add rows as needed)                                                                                                                                                                                                             | Specifications/Comments (e.g., if payments were made to you or to your institution) |  |  |  |  |  |  |
|-----------|----------------------------------------------------------------------------------|----------------------------------------------------------------------------------------------------------------------------------------------------------------------------------------------------------------------------------------------------------------------------------------------------------|-------------------------------------------------------------------------------------|--|--|--|--|--|--|
| <b>11</b> | Stock or stock options                                                           | <input checked="" type="checkbox"/> <b>None</b><br><table border="1" style="width: 100%; border-collapse: collapse;"> <tr><td style="height: 20px;"></td><td style="width: 50%;"></td></tr> <tr><td style="height: 20px;"></td><td></td></tr> <tr><td style="height: 20px;"></td><td></td></tr> </table> |                                                                                     |  |  |  |  |  |  |
|           |                                                                                  |                                                                                                                                                                                                                                                                                                          |                                                                                     |  |  |  |  |  |  |
|           |                                                                                  |                                                                                                                                                                                                                                                                                                          |                                                                                     |  |  |  |  |  |  |
|           |                                                                                  |                                                                                                                                                                                                                                                                                                          |                                                                                     |  |  |  |  |  |  |
| <b>12</b> | Receipt of equipment, materials, drugs, medical writing, gifts or other services | <input checked="" type="checkbox"/> <b>None</b><br><table border="1" style="width: 100%; border-collapse: collapse;"> <tr><td style="height: 20px;"></td><td style="width: 50%;"></td></tr> <tr><td style="height: 20px;"></td><td></td></tr> <tr><td style="height: 20px;"></td><td></td></tr> </table> |                                                                                     |  |  |  |  |  |  |
|           |                                                                                  |                                                                                                                                                                                                                                                                                                          |                                                                                     |  |  |  |  |  |  |
|           |                                                                                  |                                                                                                                                                                                                                                                                                                          |                                                                                     |  |  |  |  |  |  |
|           |                                                                                  |                                                                                                                                                                                                                                                                                                          |                                                                                     |  |  |  |  |  |  |
| <b>13</b> | Other financial or non-financial interests                                       | <input checked="" type="checkbox"/> <b>None</b><br><table border="1" style="width: 100%; border-collapse: collapse;"> <tr><td style="height: 20px;"></td><td style="width: 50%;"></td></tr> <tr><td style="height: 20px;"></td><td></td></tr> <tr><td style="height: 20px;"></td><td></td></tr> </table> |                                                                                     |  |  |  |  |  |  |
|           |                                                                                  |                                                                                                                                                                                                                                                                                                          |                                                                                     |  |  |  |  |  |  |
|           |                                                                                  |                                                                                                                                                                                                                                                                                                          |                                                                                     |  |  |  |  |  |  |
|           |                                                                                  |                                                                                                                                                                                                                                                                                                          |                                                                                     |  |  |  |  |  |  |

**Please place an "X" next to the following statement to indicate your agreement:**

I certify that I have answered every question and have not altered the wording of any of the questions on this form.

# ICMJE DISCLOSURE FORM

**Date:** 9/29/2024

**Your Name:** Jianhao Chen

**Manuscript Title:** 68Ga-MY6349 PET/CT imaging to assess Trop2 expression in multiple types of cancer

**Manuscript Number (if known):** 185408-JCI-CMED-RV-2

In the interest of transparency, we ask you to disclose all relationships/activities/interests listed below that are related to the content of your manuscript. "Related" means any relation with for-profit or not-for-profit third parties whose interests may be affected by the content of the manuscript. Disclosure represents a commitment to transparency and does not necessarily indicate a bias. If you are in doubt about whether to list a relationship/activity/interest, it is preferable that you do so.

The author's relationships/activities/interests should be defined broadly. For example, if your manuscript pertains to the epidemiology of hypertension, you should declare all relationships with manufacturers of antihypertensive medication, even if that medication is not mentioned in the manuscript.

In item #1 below, report all support for the work reported in this manuscript without time limit. For all other items, the time frame for disclosure is the past 36 months.

|                                                           |                                                                                                                                                                                | Name all entities with whom you have this relationship or indicate none (add rows as needed)                                                                                                                                               | Specifications/Comments (e.g., if payments were made to you or to your institution) |  |  |  |  |  |                                                                                                                                           |
|-----------------------------------------------------------|--------------------------------------------------------------------------------------------------------------------------------------------------------------------------------|--------------------------------------------------------------------------------------------------------------------------------------------------------------------------------------------------------------------------------------------|-------------------------------------------------------------------------------------|--|--|--|--|--|-------------------------------------------------------------------------------------------------------------------------------------------|
| <b>Time frame: Since the initial planning of the work</b> |                                                                                                                                                                                |                                                                                                                                                                                                                                            |                                                                                     |  |  |  |  |  |                                                                                                                                           |
| <b>1</b>                                                  | All support for the present manuscript (e.g., funding, provision of study materials, medical writing, article processing charges, etc.)<br><b>No time limit for this item.</b> | <input checked="" type="checkbox"/> <b>None</b><br><table border="1" style="width: 100%; height: 40px; margin-top: 5px;"> <tr><td style="width: 60%;"></td><td></td></tr> <tr><td></td><td></td></tr> <tr><td></td><td></td></tr> </table> |                                                                                     |  |  |  |  |  | <div style="border: 1px solid black; padding: 2px; font-size: small; text-align: center;">Click the tab key to add additional rows.</div> |
|                                                           |                                                                                                                                                                                |                                                                                                                                                                                                                                            |                                                                                     |  |  |  |  |  |                                                                                                                                           |
|                                                           |                                                                                                                                                                                |                                                                                                                                                                                                                                            |                                                                                     |  |  |  |  |  |                                                                                                                                           |
|                                                           |                                                                                                                                                                                |                                                                                                                                                                                                                                            |                                                                                     |  |  |  |  |  |                                                                                                                                           |
| <b>Time frame: past 36 months</b>                         |                                                                                                                                                                                |                                                                                                                                                                                                                                            |                                                                                     |  |  |  |  |  |                                                                                                                                           |
| <b>2</b>                                                  | Grants or contracts from any entity (if not indicated in item #1 above).                                                                                                       | <input checked="" type="checkbox"/> <b>None</b><br><table border="1" style="width: 100%; height: 40px; margin-top: 5px;"> <tr><td style="width: 60%;"></td><td></td></tr> <tr><td></td><td></td></tr> <tr><td></td><td></td></tr> </table> |                                                                                     |  |  |  |  |  |                                                                                                                                           |
|                                                           |                                                                                                                                                                                |                                                                                                                                                                                                                                            |                                                                                     |  |  |  |  |  |                                                                                                                                           |
|                                                           |                                                                                                                                                                                |                                                                                                                                                                                                                                            |                                                                                     |  |  |  |  |  |                                                                                                                                           |
|                                                           |                                                                                                                                                                                |                                                                                                                                                                                                                                            |                                                                                     |  |  |  |  |  |                                                                                                                                           |
| <b>3</b>                                                  | Royalties or licenses                                                                                                                                                          | <input checked="" type="checkbox"/> <b>None</b><br><table border="1" style="width: 100%; height: 40px; margin-top: 5px;"> <tr><td style="width: 60%;"></td><td></td></tr> <tr><td></td><td></td></tr> <tr><td></td><td></td></tr> </table> |                                                                                     |  |  |  |  |  |                                                                                                                                           |
|                                                           |                                                                                                                                                                                |                                                                                                                                                                                                                                            |                                                                                     |  |  |  |  |  |                                                                                                                                           |
|                                                           |                                                                                                                                                                                |                                                                                                                                                                                                                                            |                                                                                     |  |  |  |  |  |                                                                                                                                           |
|                                                           |                                                                                                                                                                                |                                                                                                                                                                                                                                            |                                                                                     |  |  |  |  |  |                                                                                                                                           |

|    |                                                                                                              | Name all entities with whom you have this relationship or indicate none (add rows as needed)                                                                                                                                                                                                                                                                           | Specifications/Comments (e.g., if payments were made to you or to your institution) |  |  |  |  |  |  |  |  |
|----|--------------------------------------------------------------------------------------------------------------|------------------------------------------------------------------------------------------------------------------------------------------------------------------------------------------------------------------------------------------------------------------------------------------------------------------------------------------------------------------------|-------------------------------------------------------------------------------------|--|--|--|--|--|--|--|--|
| 4  | Consulting fees                                                                                              | <input checked="" type="checkbox"/> <b>None</b><br><table border="1" style="width: 100%; border-collapse: collapse;"> <tr><td style="width: 50%; height: 20px;"></td><td style="width: 50%;"></td></tr> <tr><td style="height: 20px;"></td><td></td></tr> <tr><td style="height: 20px;"></td><td></td></tr> <tr><td style="height: 20px;"></td><td></td></tr> </table> |                                                                                     |  |  |  |  |  |  |  |  |
|    |                                                                                                              |                                                                                                                                                                                                                                                                                                                                                                        |                                                                                     |  |  |  |  |  |  |  |  |
|    |                                                                                                              |                                                                                                                                                                                                                                                                                                                                                                        |                                                                                     |  |  |  |  |  |  |  |  |
|    |                                                                                                              |                                                                                                                                                                                                                                                                                                                                                                        |                                                                                     |  |  |  |  |  |  |  |  |
|    |                                                                                                              |                                                                                                                                                                                                                                                                                                                                                                        |                                                                                     |  |  |  |  |  |  |  |  |
| 5  | Payment or honoraria for lectures, presentations, speakers bureaus, manuscript writing or educational events | <input checked="" type="checkbox"/> <b>None</b><br><table border="1" style="width: 100%; border-collapse: collapse;"> <tr><td style="width: 50%; height: 20px;"></td><td style="width: 50%;"></td></tr> <tr><td style="height: 20px;"></td><td></td></tr> <tr><td style="height: 20px;"></td><td></td></tr> </table>                                                   |                                                                                     |  |  |  |  |  |  |  |  |
|    |                                                                                                              |                                                                                                                                                                                                                                                                                                                                                                        |                                                                                     |  |  |  |  |  |  |  |  |
|    |                                                                                                              |                                                                                                                                                                                                                                                                                                                                                                        |                                                                                     |  |  |  |  |  |  |  |  |
|    |                                                                                                              |                                                                                                                                                                                                                                                                                                                                                                        |                                                                                     |  |  |  |  |  |  |  |  |
| 6  | Payment for expert testimony                                                                                 | <input checked="" type="checkbox"/> <b>None</b><br><table border="1" style="width: 100%; border-collapse: collapse;"> <tr><td style="width: 50%; height: 20px;"></td><td style="width: 50%;"></td></tr> <tr><td style="height: 20px;"></td><td></td></tr> <tr><td style="height: 20px;"></td><td></td></tr> </table>                                                   |                                                                                     |  |  |  |  |  |  |  |  |
|    |                                                                                                              |                                                                                                                                                                                                                                                                                                                                                                        |                                                                                     |  |  |  |  |  |  |  |  |
|    |                                                                                                              |                                                                                                                                                                                                                                                                                                                                                                        |                                                                                     |  |  |  |  |  |  |  |  |
|    |                                                                                                              |                                                                                                                                                                                                                                                                                                                                                                        |                                                                                     |  |  |  |  |  |  |  |  |
| 7  | Support for attending meetings and/or travel                                                                 | <input checked="" type="checkbox"/> <b>None</b><br><table border="1" style="width: 100%; border-collapse: collapse;"> <tr><td style="width: 50%; height: 20px;"></td><td style="width: 50%;"></td></tr> <tr><td style="height: 20px;"></td><td></td></tr> <tr><td style="height: 20px;"></td><td></td></tr> </table>                                                   |                                                                                     |  |  |  |  |  |  |  |  |
|    |                                                                                                              |                                                                                                                                                                                                                                                                                                                                                                        |                                                                                     |  |  |  |  |  |  |  |  |
|    |                                                                                                              |                                                                                                                                                                                                                                                                                                                                                                        |                                                                                     |  |  |  |  |  |  |  |  |
|    |                                                                                                              |                                                                                                                                                                                                                                                                                                                                                                        |                                                                                     |  |  |  |  |  |  |  |  |
| 8  | Patents planned, issued or pending                                                                           | <input checked="" type="checkbox"/> <b>None</b><br><table border="1" style="width: 100%; border-collapse: collapse;"> <tr><td style="width: 50%; height: 20px;"></td><td style="width: 50%;"></td></tr> <tr><td style="height: 20px;"></td><td></td></tr> <tr><td style="height: 20px;"></td><td></td></tr> </table>                                                   |                                                                                     |  |  |  |  |  |  |  |  |
|    |                                                                                                              |                                                                                                                                                                                                                                                                                                                                                                        |                                                                                     |  |  |  |  |  |  |  |  |
|    |                                                                                                              |                                                                                                                                                                                                                                                                                                                                                                        |                                                                                     |  |  |  |  |  |  |  |  |
|    |                                                                                                              |                                                                                                                                                                                                                                                                                                                                                                        |                                                                                     |  |  |  |  |  |  |  |  |
| 9  | Participation on a Data Safety Monitoring Board or Advisory Board                                            | <input checked="" type="checkbox"/> <b>None</b><br><table border="1" style="width: 100%; border-collapse: collapse;"> <tr><td style="width: 50%; height: 20px;"></td><td style="width: 50%;"></td></tr> <tr><td style="height: 20px;"></td><td></td></tr> <tr><td style="height: 20px;"></td><td></td></tr> </table>                                                   |                                                                                     |  |  |  |  |  |  |  |  |
|    |                                                                                                              |                                                                                                                                                                                                                                                                                                                                                                        |                                                                                     |  |  |  |  |  |  |  |  |
|    |                                                                                                              |                                                                                                                                                                                                                                                                                                                                                                        |                                                                                     |  |  |  |  |  |  |  |  |
|    |                                                                                                              |                                                                                                                                                                                                                                                                                                                                                                        |                                                                                     |  |  |  |  |  |  |  |  |
| 10 | Leadership or fiduciary role in other board, society, committee or advocacy group, paid or unpaid            | <input checked="" type="checkbox"/> <b>None</b><br><table border="1" style="width: 100%; border-collapse: collapse;"> <tr><td style="width: 50%; height: 20px;"></td><td style="width: 50%;"></td></tr> <tr><td style="height: 20px;"></td><td></td></tr> <tr><td style="height: 20px;"></td><td></td></tr> </table>                                                   |                                                                                     |  |  |  |  |  |  |  |  |
|    |                                                                                                              |                                                                                                                                                                                                                                                                                                                                                                        |                                                                                     |  |  |  |  |  |  |  |  |
|    |                                                                                                              |                                                                                                                                                                                                                                                                                                                                                                        |                                                                                     |  |  |  |  |  |  |  |  |
|    |                                                                                                              |                                                                                                                                                                                                                                                                                                                                                                        |                                                                                     |  |  |  |  |  |  |  |  |

|           |                                                                                  | Name all entities with whom you have this relationship or indicate none (add rows as needed)                                                                                                    | Specifications/Comments (e.g., if payments were made to you or to your institution) |  |  |  |  |  |  |
|-----------|----------------------------------------------------------------------------------|-------------------------------------------------------------------------------------------------------------------------------------------------------------------------------------------------|-------------------------------------------------------------------------------------|--|--|--|--|--|--|
| <b>11</b> | Stock or stock options                                                           | <input checked="" type="checkbox"/> <b>None</b><br><table border="1" data-bbox="375 260 1507 359"> <tr><td></td><td></td></tr> <tr><td></td><td></td></tr> <tr><td></td><td></td></tr> </table> |                                                                                     |  |  |  |  |  |  |
|           |                                                                                  |                                                                                                                                                                                                 |                                                                                     |  |  |  |  |  |  |
|           |                                                                                  |                                                                                                                                                                                                 |                                                                                     |  |  |  |  |  |  |
|           |                                                                                  |                                                                                                                                                                                                 |                                                                                     |  |  |  |  |  |  |
| <b>12</b> | Receipt of equipment, materials, drugs, medical writing, gifts or other services | <input checked="" type="checkbox"/> <b>None</b><br><table border="1" data-bbox="375 478 1507 577"> <tr><td></td><td></td></tr> <tr><td></td><td></td></tr> <tr><td></td><td></td></tr> </table> |                                                                                     |  |  |  |  |  |  |
|           |                                                                                  |                                                                                                                                                                                                 |                                                                                     |  |  |  |  |  |  |
|           |                                                                                  |                                                                                                                                                                                                 |                                                                                     |  |  |  |  |  |  |
|           |                                                                                  |                                                                                                                                                                                                 |                                                                                     |  |  |  |  |  |  |
| <b>13</b> | Other financial or non-financial interests                                       | <input checked="" type="checkbox"/> <b>None</b><br><table border="1" data-bbox="375 695 1507 793"> <tr><td></td><td></td></tr> <tr><td></td><td></td></tr> <tr><td></td><td></td></tr> </table> |                                                                                     |  |  |  |  |  |  |
|           |                                                                                  |                                                                                                                                                                                                 |                                                                                     |  |  |  |  |  |  |
|           |                                                                                  |                                                                                                                                                                                                 |                                                                                     |  |  |  |  |  |  |
|           |                                                                                  |                                                                                                                                                                                                 |                                                                                     |  |  |  |  |  |  |

Please place an "X" next to the following statement to indicate your agreement:

I certify that I have answered every question and have not altered the wording of any of the questions on this form.

# ICMJE DISCLOSURE FORM

**Date:** 9/29/2024

**Your Name:** Hao Fu

**Manuscript Title:** 68Ga-MY6349 PET/CT imaging to assess Trop2 expression in multiple types of cancer

**Manuscript Number (if known):** 185408-JCI-CMED-RV-2

In the interest of transparency, we ask you to disclose all relationships/activities/interests listed below that are related to the content of your manuscript. "Related" means any relation with for-profit or not-for-profit third parties whose interests may be affected by the content of the manuscript. Disclosure represents a commitment to transparency and does not necessarily indicate a bias. If you are in doubt about whether to list a relationship/activity/interest, it is preferable that you do so.

The author's relationships/activities/interests should be defined broadly. For example, if your manuscript pertains to the epidemiology of hypertension, you should declare all relationships with manufacturers of antihypertensive medication, even if that medication is not mentioned in the manuscript.

In item #1 below, report all support for the work reported in this manuscript without time limit. For all other items, the time frame for disclosure is the past 36 months.

|                                                    |                                                                                                                                                                                | Name all entities with whom you have this relationship or indicate none (add rows as needed)                                                                                                                                                                                                                                                   | Specifications/Comments (e.g., if payments were made to you or to your institution) |  |  |  |  |  |                                                                                                                                                                                                                                                                                                                                                                                                      |  |  |  |  |  |  |
|----------------------------------------------------|--------------------------------------------------------------------------------------------------------------------------------------------------------------------------------|------------------------------------------------------------------------------------------------------------------------------------------------------------------------------------------------------------------------------------------------------------------------------------------------------------------------------------------------|-------------------------------------------------------------------------------------|--|--|--|--|--|------------------------------------------------------------------------------------------------------------------------------------------------------------------------------------------------------------------------------------------------------------------------------------------------------------------------------------------------------------------------------------------------------|--|--|--|--|--|--|
| Time frame: Since the initial planning of the work |                                                                                                                                                                                |                                                                                                                                                                                                                                                                                                                                                |                                                                                     |  |  |  |  |  |                                                                                                                                                                                                                                                                                                                                                                                                      |  |  |  |  |  |  |
| <b>1</b>                                           | All support for the present manuscript (e.g., funding, provision of study materials, medical writing, article processing charges, etc.)<br><b>No time limit for this item.</b> | <input checked="" type="checkbox"/> <b>None</b><br><table border="1" style="width: 100%; height: 40px; margin-top: 5px;"> <tr><td style="width: 50%;"></td><td style="width: 50%;"></td></tr> <tr><td style="width: 50%;"></td><td style="width: 50%;"></td></tr> <tr><td style="width: 50%;"></td><td style="width: 50%;"></td></tr> </table> |                                                                                     |  |  |  |  |  | <table border="1" style="width: 100%; height: 40px; margin-top: 5px;"> <tr><td style="width: 50%;"></td><td style="width: 50%;"></td></tr> <tr><td style="width: 50%;"></td><td style="width: 50%;"></td></tr> <tr><td style="width: 50%;"></td><td style="width: 50%;"></td></tr> </table> <p style="font-size: small; color: gray; margin-top: 5px;">Click the tab key to add additional rows.</p> |  |  |  |  |  |  |
|                                                    |                                                                                                                                                                                |                                                                                                                                                                                                                                                                                                                                                |                                                                                     |  |  |  |  |  |                                                                                                                                                                                                                                                                                                                                                                                                      |  |  |  |  |  |  |
|                                                    |                                                                                                                                                                                |                                                                                                                                                                                                                                                                                                                                                |                                                                                     |  |  |  |  |  |                                                                                                                                                                                                                                                                                                                                                                                                      |  |  |  |  |  |  |
|                                                    |                                                                                                                                                                                |                                                                                                                                                                                                                                                                                                                                                |                                                                                     |  |  |  |  |  |                                                                                                                                                                                                                                                                                                                                                                                                      |  |  |  |  |  |  |
|                                                    |                                                                                                                                                                                |                                                                                                                                                                                                                                                                                                                                                |                                                                                     |  |  |  |  |  |                                                                                                                                                                                                                                                                                                                                                                                                      |  |  |  |  |  |  |
|                                                    |                                                                                                                                                                                |                                                                                                                                                                                                                                                                                                                                                |                                                                                     |  |  |  |  |  |                                                                                                                                                                                                                                                                                                                                                                                                      |  |  |  |  |  |  |
|                                                    |                                                                                                                                                                                |                                                                                                                                                                                                                                                                                                                                                |                                                                                     |  |  |  |  |  |                                                                                                                                                                                                                                                                                                                                                                                                      |  |  |  |  |  |  |
| Time frame: past 36 months                         |                                                                                                                                                                                |                                                                                                                                                                                                                                                                                                                                                |                                                                                     |  |  |  |  |  |                                                                                                                                                                                                                                                                                                                                                                                                      |  |  |  |  |  |  |
| <b>2</b>                                           | Grants or contracts from any entity (if not indicated in item #1 above).                                                                                                       | <input checked="" type="checkbox"/> <b>None</b><br><table border="1" style="width: 100%; height: 40px; margin-top: 5px;"> <tr><td style="width: 50%;"></td><td style="width: 50%;"></td></tr> <tr><td style="width: 50%;"></td><td style="width: 50%;"></td></tr> <tr><td style="width: 50%;"></td><td style="width: 50%;"></td></tr> </table> |                                                                                     |  |  |  |  |  | <table border="1" style="width: 100%; height: 40px; margin-top: 5px;"> <tr><td style="width: 50%;"></td><td style="width: 50%;"></td></tr> <tr><td style="width: 50%;"></td><td style="width: 50%;"></td></tr> <tr><td style="width: 50%;"></td><td style="width: 50%;"></td></tr> </table>                                                                                                          |  |  |  |  |  |  |
|                                                    |                                                                                                                                                                                |                                                                                                                                                                                                                                                                                                                                                |                                                                                     |  |  |  |  |  |                                                                                                                                                                                                                                                                                                                                                                                                      |  |  |  |  |  |  |
|                                                    |                                                                                                                                                                                |                                                                                                                                                                                                                                                                                                                                                |                                                                                     |  |  |  |  |  |                                                                                                                                                                                                                                                                                                                                                                                                      |  |  |  |  |  |  |
|                                                    |                                                                                                                                                                                |                                                                                                                                                                                                                                                                                                                                                |                                                                                     |  |  |  |  |  |                                                                                                                                                                                                                                                                                                                                                                                                      |  |  |  |  |  |  |
|                                                    |                                                                                                                                                                                |                                                                                                                                                                                                                                                                                                                                                |                                                                                     |  |  |  |  |  |                                                                                                                                                                                                                                                                                                                                                                                                      |  |  |  |  |  |  |
|                                                    |                                                                                                                                                                                |                                                                                                                                                                                                                                                                                                                                                |                                                                                     |  |  |  |  |  |                                                                                                                                                                                                                                                                                                                                                                                                      |  |  |  |  |  |  |
|                                                    |                                                                                                                                                                                |                                                                                                                                                                                                                                                                                                                                                |                                                                                     |  |  |  |  |  |                                                                                                                                                                                                                                                                                                                                                                                                      |  |  |  |  |  |  |
| <b>3</b>                                           | Royalties or licenses                                                                                                                                                          | <input checked="" type="checkbox"/> <b>None</b><br><table border="1" style="width: 100%; height: 40px; margin-top: 5px;"> <tr><td style="width: 50%;"></td><td style="width: 50%;"></td></tr> <tr><td style="width: 50%;"></td><td style="width: 50%;"></td></tr> <tr><td style="width: 50%;"></td><td style="width: 50%;"></td></tr> </table> |                                                                                     |  |  |  |  |  | <table border="1" style="width: 100%; height: 40px; margin-top: 5px;"> <tr><td style="width: 50%;"></td><td style="width: 50%;"></td></tr> <tr><td style="width: 50%;"></td><td style="width: 50%;"></td></tr> <tr><td style="width: 50%;"></td><td style="width: 50%;"></td></tr> </table>                                                                                                          |  |  |  |  |  |  |
|                                                    |                                                                                                                                                                                |                                                                                                                                                                                                                                                                                                                                                |                                                                                     |  |  |  |  |  |                                                                                                                                                                                                                                                                                                                                                                                                      |  |  |  |  |  |  |
|                                                    |                                                                                                                                                                                |                                                                                                                                                                                                                                                                                                                                                |                                                                                     |  |  |  |  |  |                                                                                                                                                                                                                                                                                                                                                                                                      |  |  |  |  |  |  |
|                                                    |                                                                                                                                                                                |                                                                                                                                                                                                                                                                                                                                                |                                                                                     |  |  |  |  |  |                                                                                                                                                                                                                                                                                                                                                                                                      |  |  |  |  |  |  |
|                                                    |                                                                                                                                                                                |                                                                                                                                                                                                                                                                                                                                                |                                                                                     |  |  |  |  |  |                                                                                                                                                                                                                                                                                                                                                                                                      |  |  |  |  |  |  |
|                                                    |                                                                                                                                                                                |                                                                                                                                                                                                                                                                                                                                                |                                                                                     |  |  |  |  |  |                                                                                                                                                                                                                                                                                                                                                                                                      |  |  |  |  |  |  |
|                                                    |                                                                                                                                                                                |                                                                                                                                                                                                                                                                                                                                                |                                                                                     |  |  |  |  |  |                                                                                                                                                                                                                                                                                                                                                                                                      |  |  |  |  |  |  |

|    |                                                                                                              | Name all entities with whom you have this relationship or indicate none (add rows as needed)                                                                                                                                                                                                                                                                           | Specifications/Comments (e.g., if payments were made to you or to your institution) |  |  |  |  |  |  |  |  |
|----|--------------------------------------------------------------------------------------------------------------|------------------------------------------------------------------------------------------------------------------------------------------------------------------------------------------------------------------------------------------------------------------------------------------------------------------------------------------------------------------------|-------------------------------------------------------------------------------------|--|--|--|--|--|--|--|--|
| 4  | Consulting fees                                                                                              | <input checked="" type="checkbox"/> <b>None</b><br><table border="1" style="width: 100%; border-collapse: collapse;"> <tr><td style="width: 50%; height: 20px;"></td><td style="width: 50%;"></td></tr> <tr><td style="height: 20px;"></td><td></td></tr> <tr><td style="height: 20px;"></td><td></td></tr> <tr><td style="height: 20px;"></td><td></td></tr> </table> |                                                                                     |  |  |  |  |  |  |  |  |
|    |                                                                                                              |                                                                                                                                                                                                                                                                                                                                                                        |                                                                                     |  |  |  |  |  |  |  |  |
|    |                                                                                                              |                                                                                                                                                                                                                                                                                                                                                                        |                                                                                     |  |  |  |  |  |  |  |  |
|    |                                                                                                              |                                                                                                                                                                                                                                                                                                                                                                        |                                                                                     |  |  |  |  |  |  |  |  |
|    |                                                                                                              |                                                                                                                                                                                                                                                                                                                                                                        |                                                                                     |  |  |  |  |  |  |  |  |
| 5  | Payment or honoraria for lectures, presentations, speakers bureaus, manuscript writing or educational events | <input checked="" type="checkbox"/> <b>None</b><br><table border="1" style="width: 100%; border-collapse: collapse;"> <tr><td style="width: 50%; height: 20px;"></td><td style="width: 50%;"></td></tr> <tr><td style="height: 20px;"></td><td></td></tr> <tr><td style="height: 20px;"></td><td></td></tr> </table>                                                   |                                                                                     |  |  |  |  |  |  |  |  |
|    |                                                                                                              |                                                                                                                                                                                                                                                                                                                                                                        |                                                                                     |  |  |  |  |  |  |  |  |
|    |                                                                                                              |                                                                                                                                                                                                                                                                                                                                                                        |                                                                                     |  |  |  |  |  |  |  |  |
|    |                                                                                                              |                                                                                                                                                                                                                                                                                                                                                                        |                                                                                     |  |  |  |  |  |  |  |  |
| 6  | Payment for expert testimony                                                                                 | <input checked="" type="checkbox"/> <b>None</b><br><table border="1" style="width: 100%; border-collapse: collapse;"> <tr><td style="width: 50%; height: 20px;"></td><td style="width: 50%;"></td></tr> <tr><td style="height: 20px;"></td><td></td></tr> <tr><td style="height: 20px;"></td><td></td></tr> </table>                                                   |                                                                                     |  |  |  |  |  |  |  |  |
|    |                                                                                                              |                                                                                                                                                                                                                                                                                                                                                                        |                                                                                     |  |  |  |  |  |  |  |  |
|    |                                                                                                              |                                                                                                                                                                                                                                                                                                                                                                        |                                                                                     |  |  |  |  |  |  |  |  |
|    |                                                                                                              |                                                                                                                                                                                                                                                                                                                                                                        |                                                                                     |  |  |  |  |  |  |  |  |
| 7  | Support for attending meetings and/or travel                                                                 | <input checked="" type="checkbox"/> <b>None</b><br><table border="1" style="width: 100%; border-collapse: collapse;"> <tr><td style="width: 50%; height: 20px;"></td><td style="width: 50%;"></td></tr> <tr><td style="height: 20px;"></td><td></td></tr> <tr><td style="height: 20px;"></td><td></td></tr> </table>                                                   |                                                                                     |  |  |  |  |  |  |  |  |
|    |                                                                                                              |                                                                                                                                                                                                                                                                                                                                                                        |                                                                                     |  |  |  |  |  |  |  |  |
|    |                                                                                                              |                                                                                                                                                                                                                                                                                                                                                                        |                                                                                     |  |  |  |  |  |  |  |  |
|    |                                                                                                              |                                                                                                                                                                                                                                                                                                                                                                        |                                                                                     |  |  |  |  |  |  |  |  |
| 8  | Patents planned, issued or pending                                                                           | <input checked="" type="checkbox"/> <b>None</b><br><table border="1" style="width: 100%; border-collapse: collapse;"> <tr><td style="width: 50%; height: 20px;"></td><td style="width: 50%;"></td></tr> <tr><td style="height: 20px;"></td><td></td></tr> <tr><td style="height: 20px;"></td><td></td></tr> </table>                                                   |                                                                                     |  |  |  |  |  |  |  |  |
|    |                                                                                                              |                                                                                                                                                                                                                                                                                                                                                                        |                                                                                     |  |  |  |  |  |  |  |  |
|    |                                                                                                              |                                                                                                                                                                                                                                                                                                                                                                        |                                                                                     |  |  |  |  |  |  |  |  |
|    |                                                                                                              |                                                                                                                                                                                                                                                                                                                                                                        |                                                                                     |  |  |  |  |  |  |  |  |
| 9  | Participation on a Data Safety Monitoring Board or Advisory Board                                            | <input checked="" type="checkbox"/> <b>None</b><br><table border="1" style="width: 100%; border-collapse: collapse;"> <tr><td style="width: 50%; height: 20px;"></td><td style="width: 50%;"></td></tr> <tr><td style="height: 20px;"></td><td></td></tr> <tr><td style="height: 20px;"></td><td></td></tr> </table>                                                   |                                                                                     |  |  |  |  |  |  |  |  |
|    |                                                                                                              |                                                                                                                                                                                                                                                                                                                                                                        |                                                                                     |  |  |  |  |  |  |  |  |
|    |                                                                                                              |                                                                                                                                                                                                                                                                                                                                                                        |                                                                                     |  |  |  |  |  |  |  |  |
|    |                                                                                                              |                                                                                                                                                                                                                                                                                                                                                                        |                                                                                     |  |  |  |  |  |  |  |  |
| 10 | Leadership or fiduciary role in other board, society, committee or advocacy group, paid or unpaid            | <input checked="" type="checkbox"/> <b>None</b><br><table border="1" style="width: 100%; border-collapse: collapse;"> <tr><td style="width: 50%; height: 20px;"></td><td style="width: 50%;"></td></tr> <tr><td style="height: 20px;"></td><td></td></tr> <tr><td style="height: 20px;"></td><td></td></tr> </table>                                                   |                                                                                     |  |  |  |  |  |  |  |  |
|    |                                                                                                              |                                                                                                                                                                                                                                                                                                                                                                        |                                                                                     |  |  |  |  |  |  |  |  |
|    |                                                                                                              |                                                                                                                                                                                                                                                                                                                                                                        |                                                                                     |  |  |  |  |  |  |  |  |
|    |                                                                                                              |                                                                                                                                                                                                                                                                                                                                                                        |                                                                                     |  |  |  |  |  |  |  |  |

|           |                                                                                  | Name all entities with whom you have this relationship or indicate none (add rows as needed)                                                                                                                                                                                                                         | Specifications/Comments (e.g., if payments were made to you or to your institution) |  |  |  |  |  |  |
|-----------|----------------------------------------------------------------------------------|----------------------------------------------------------------------------------------------------------------------------------------------------------------------------------------------------------------------------------------------------------------------------------------------------------------------|-------------------------------------------------------------------------------------|--|--|--|--|--|--|
| <b>11</b> | Stock or stock options                                                           | <input checked="" type="checkbox"/> <b>None</b><br><table border="1" style="width: 100%; border-collapse: collapse;"> <tr><td style="width: 50%; height: 20px;"></td><td style="width: 50%;"></td></tr> <tr><td style="height: 20px;"></td><td></td></tr> <tr><td style="height: 20px;"></td><td></td></tr> </table> |                                                                                     |  |  |  |  |  |  |
|           |                                                                                  |                                                                                                                                                                                                                                                                                                                      |                                                                                     |  |  |  |  |  |  |
|           |                                                                                  |                                                                                                                                                                                                                                                                                                                      |                                                                                     |  |  |  |  |  |  |
|           |                                                                                  |                                                                                                                                                                                                                                                                                                                      |                                                                                     |  |  |  |  |  |  |
| <b>12</b> | Receipt of equipment, materials, drugs, medical writing, gifts or other services | <input checked="" type="checkbox"/> <b>None</b><br><table border="1" style="width: 100%; border-collapse: collapse;"> <tr><td style="width: 50%; height: 20px;"></td><td style="width: 50%;"></td></tr> <tr><td style="height: 20px;"></td><td></td></tr> <tr><td style="height: 20px;"></td><td></td></tr> </table> |                                                                                     |  |  |  |  |  |  |
|           |                                                                                  |                                                                                                                                                                                                                                                                                                                      |                                                                                     |  |  |  |  |  |  |
|           |                                                                                  |                                                                                                                                                                                                                                                                                                                      |                                                                                     |  |  |  |  |  |  |
|           |                                                                                  |                                                                                                                                                                                                                                                                                                                      |                                                                                     |  |  |  |  |  |  |
| <b>13</b> | Other financial or non-financial interests                                       | <input checked="" type="checkbox"/> <b>None</b><br><table border="1" style="width: 100%; border-collapse: collapse;"> <tr><td style="width: 50%; height: 20px;"></td><td style="width: 50%;"></td></tr> <tr><td style="height: 20px;"></td><td></td></tr> <tr><td style="height: 20px;"></td><td></td></tr> </table> |                                                                                     |  |  |  |  |  |  |
|           |                                                                                  |                                                                                                                                                                                                                                                                                                                      |                                                                                     |  |  |  |  |  |  |
|           |                                                                                  |                                                                                                                                                                                                                                                                                                                      |                                                                                     |  |  |  |  |  |  |
|           |                                                                                  |                                                                                                                                                                                                                                                                                                                      |                                                                                     |  |  |  |  |  |  |

**Please place an "X" next to the following statement to indicate your agreement:**

I certify that I have answered every question and have not altered the wording of any of the questions on this form.

## ICMJE DISCLOSURE FORM

**Date:** 9/29/2024

**Your Name:** Jiayu Cai

**Manuscript Title:** 68Ga-MY6349 PET/CT imaging to assess Trop2 expression in multiple types of cancer

**Manuscript Number (if known):** 185408-JCI-CMED-RV-2

In the interest of transparency, we ask you to disclose all relationships/activities/interests listed below that are related to the content of your manuscript. "Related" means any relation with for-profit or not-for-profit third parties whose interests may be affected by the content of the manuscript. Disclosure represents a commitment to transparency and does not necessarily indicate a bias. If you are in doubt about whether to list a relationship/activity/interest, it is preferable that you do so.

The author's relationships/activities/interests should be defined broadly. For example, if your manuscript pertains to the epidemiology of hypertension, you should declare all relationships with manufacturers of antihypertensive medication, even if that medication is not mentioned in the manuscript.

In item #1 below, report all support for the work reported in this manuscript without time limit. For all other items, the time frame for disclosure is the past 36 months.

|                                                    |                                                                                                                                                                                | Name all entities with whom you have this relationship or indicate none (add rows as needed)                                                                                                                                                                                                                                                                                                           | Specifications/Comments (e.g., if payments were made to you or to your institution) |  |  |  |  |                                           |  |
|----------------------------------------------------|--------------------------------------------------------------------------------------------------------------------------------------------------------------------------------|--------------------------------------------------------------------------------------------------------------------------------------------------------------------------------------------------------------------------------------------------------------------------------------------------------------------------------------------------------------------------------------------------------|-------------------------------------------------------------------------------------|--|--|--|--|-------------------------------------------|--|
| Time frame: Since the initial planning of the work |                                                                                                                                                                                |                                                                                                                                                                                                                                                                                                                                                                                                        |                                                                                     |  |  |  |  |                                           |  |
| <b>1</b>                                           | All support for the present manuscript (e.g., funding, provision of study materials, medical writing, article processing charges, etc.)<br><b>No time limit for this item.</b> | <input checked="" type="checkbox"/> <b>None</b><br><br><table border="1" style="width: 100%; border-collapse: collapse;"> <tr><td style="height: 20px;"> </td><td style="width: 20%;"></td></tr> <tr><td style="height: 20px;"> </td><td></td></tr> <tr><td style="height: 20px;"> </td><td style="text-align: center; font-size: small;">Click the tab key to add additional rows.</td></tr> </table> |                                                                                     |  |  |  |  | Click the tab key to add additional rows. |  |
|                                                    |                                                                                                                                                                                |                                                                                                                                                                                                                                                                                                                                                                                                        |                                                                                     |  |  |  |  |                                           |  |
|                                                    |                                                                                                                                                                                |                                                                                                                                                                                                                                                                                                                                                                                                        |                                                                                     |  |  |  |  |                                           |  |
|                                                    | Click the tab key to add additional rows.                                                                                                                                      |                                                                                                                                                                                                                                                                                                                                                                                                        |                                                                                     |  |  |  |  |                                           |  |
| Time frame: past 36 months                         |                                                                                                                                                                                |                                                                                                                                                                                                                                                                                                                                                                                                        |                                                                                     |  |  |  |  |                                           |  |
| <b>2</b>                                           | Grants or contracts from any entity (if not indicated in item #1 above).                                                                                                       | <input checked="" type="checkbox"/> <b>None</b><br><br><table border="1" style="width: 100%; border-collapse: collapse;"> <tr><td style="height: 20px;"> </td><td style="width: 20%;"></td></tr> <tr><td style="height: 20px;"> </td><td></td></tr> <tr><td style="height: 20px;"> </td><td></td></tr> </table>                                                                                        |                                                                                     |  |  |  |  |                                           |  |
|                                                    |                                                                                                                                                                                |                                                                                                                                                                                                                                                                                                                                                                                                        |                                                                                     |  |  |  |  |                                           |  |
|                                                    |                                                                                                                                                                                |                                                                                                                                                                                                                                                                                                                                                                                                        |                                                                                     |  |  |  |  |                                           |  |
|                                                    |                                                                                                                                                                                |                                                                                                                                                                                                                                                                                                                                                                                                        |                                                                                     |  |  |  |  |                                           |  |
| <b>3</b>                                           | Royalties or licenses                                                                                                                                                          | <input checked="" type="checkbox"/> <b>None</b><br><br><table border="1" style="width: 100%; border-collapse: collapse;"> <tr><td style="height: 20px;"> </td><td style="width: 20%;"></td></tr> <tr><td style="height: 20px;"> </td><td></td></tr> <tr><td style="height: 20px;"> </td><td></td></tr> </table>                                                                                        |                                                                                     |  |  |  |  |                                           |  |
|                                                    |                                                                                                                                                                                |                                                                                                                                                                                                                                                                                                                                                                                                        |                                                                                     |  |  |  |  |                                           |  |
|                                                    |                                                                                                                                                                                |                                                                                                                                                                                                                                                                                                                                                                                                        |                                                                                     |  |  |  |  |                                           |  |
|                                                    |                                                                                                                                                                                |                                                                                                                                                                                                                                                                                                                                                                                                        |                                                                                     |  |  |  |  |                                           |  |

|    |                                                                                                              | Name all entities with whom you have this relationship or indicate none (add rows as needed)                                                                                                                                                                                                                                                                           | Specifications/Comments (e.g., if payments were made to you or to your institution) |  |  |  |  |  |  |  |  |
|----|--------------------------------------------------------------------------------------------------------------|------------------------------------------------------------------------------------------------------------------------------------------------------------------------------------------------------------------------------------------------------------------------------------------------------------------------------------------------------------------------|-------------------------------------------------------------------------------------|--|--|--|--|--|--|--|--|
| 4  | Consulting fees                                                                                              | <input checked="" type="checkbox"/> <b>None</b><br><table border="1" style="width: 100%; border-collapse: collapse;"> <tr><td style="width: 50%; height: 20px;"></td><td style="width: 50%;"></td></tr> <tr><td style="height: 20px;"></td><td></td></tr> <tr><td style="height: 20px;"></td><td></td></tr> <tr><td style="height: 20px;"></td><td></td></tr> </table> |                                                                                     |  |  |  |  |  |  |  |  |
|    |                                                                                                              |                                                                                                                                                                                                                                                                                                                                                                        |                                                                                     |  |  |  |  |  |  |  |  |
|    |                                                                                                              |                                                                                                                                                                                                                                                                                                                                                                        |                                                                                     |  |  |  |  |  |  |  |  |
|    |                                                                                                              |                                                                                                                                                                                                                                                                                                                                                                        |                                                                                     |  |  |  |  |  |  |  |  |
|    |                                                                                                              |                                                                                                                                                                                                                                                                                                                                                                        |                                                                                     |  |  |  |  |  |  |  |  |
| 5  | Payment or honoraria for lectures, presentations, speakers bureaus, manuscript writing or educational events | <input checked="" type="checkbox"/> <b>None</b><br><table border="1" style="width: 100%; border-collapse: collapse;"> <tr><td style="width: 50%; height: 20px;"></td><td style="width: 50%;"></td></tr> <tr><td style="height: 20px;"></td><td></td></tr> <tr><td style="height: 20px;"></td><td></td></tr> </table>                                                   |                                                                                     |  |  |  |  |  |  |  |  |
|    |                                                                                                              |                                                                                                                                                                                                                                                                                                                                                                        |                                                                                     |  |  |  |  |  |  |  |  |
|    |                                                                                                              |                                                                                                                                                                                                                                                                                                                                                                        |                                                                                     |  |  |  |  |  |  |  |  |
|    |                                                                                                              |                                                                                                                                                                                                                                                                                                                                                                        |                                                                                     |  |  |  |  |  |  |  |  |
| 6  | Payment for expert testimony                                                                                 | <input checked="" type="checkbox"/> <b>None</b><br><table border="1" style="width: 100%; border-collapse: collapse;"> <tr><td style="width: 50%; height: 20px;"></td><td style="width: 50%;"></td></tr> <tr><td style="height: 20px;"></td><td></td></tr> <tr><td style="height: 20px;"></td><td></td></tr> </table>                                                   |                                                                                     |  |  |  |  |  |  |  |  |
|    |                                                                                                              |                                                                                                                                                                                                                                                                                                                                                                        |                                                                                     |  |  |  |  |  |  |  |  |
|    |                                                                                                              |                                                                                                                                                                                                                                                                                                                                                                        |                                                                                     |  |  |  |  |  |  |  |  |
|    |                                                                                                              |                                                                                                                                                                                                                                                                                                                                                                        |                                                                                     |  |  |  |  |  |  |  |  |
| 7  | Support for attending meetings and/or travel                                                                 | <input checked="" type="checkbox"/> <b>None</b><br><table border="1" style="width: 100%; border-collapse: collapse;"> <tr><td style="width: 50%; height: 20px;"></td><td style="width: 50%;"></td></tr> <tr><td style="height: 20px;"></td><td></td></tr> <tr><td style="height: 20px;"></td><td></td></tr> </table>                                                   |                                                                                     |  |  |  |  |  |  |  |  |
|    |                                                                                                              |                                                                                                                                                                                                                                                                                                                                                                        |                                                                                     |  |  |  |  |  |  |  |  |
|    |                                                                                                              |                                                                                                                                                                                                                                                                                                                                                                        |                                                                                     |  |  |  |  |  |  |  |  |
|    |                                                                                                              |                                                                                                                                                                                                                                                                                                                                                                        |                                                                                     |  |  |  |  |  |  |  |  |
| 8  | Patents planned, issued or pending                                                                           | <input checked="" type="checkbox"/> <b>None</b><br><table border="1" style="width: 100%; border-collapse: collapse;"> <tr><td style="width: 50%; height: 20px;"></td><td style="width: 50%;"></td></tr> <tr><td style="height: 20px;"></td><td></td></tr> <tr><td style="height: 20px;"></td><td></td></tr> </table>                                                   |                                                                                     |  |  |  |  |  |  |  |  |
|    |                                                                                                              |                                                                                                                                                                                                                                                                                                                                                                        |                                                                                     |  |  |  |  |  |  |  |  |
|    |                                                                                                              |                                                                                                                                                                                                                                                                                                                                                                        |                                                                                     |  |  |  |  |  |  |  |  |
|    |                                                                                                              |                                                                                                                                                                                                                                                                                                                                                                        |                                                                                     |  |  |  |  |  |  |  |  |
| 9  | Participation on a Data Safety Monitoring Board or Advisory Board                                            | <input checked="" type="checkbox"/> <b>None</b><br><table border="1" style="width: 100%; border-collapse: collapse;"> <tr><td style="width: 50%; height: 20px;"></td><td style="width: 50%;"></td></tr> <tr><td style="height: 20px;"></td><td></td></tr> <tr><td style="height: 20px;"></td><td></td></tr> </table>                                                   |                                                                                     |  |  |  |  |  |  |  |  |
|    |                                                                                                              |                                                                                                                                                                                                                                                                                                                                                                        |                                                                                     |  |  |  |  |  |  |  |  |
|    |                                                                                                              |                                                                                                                                                                                                                                                                                                                                                                        |                                                                                     |  |  |  |  |  |  |  |  |
|    |                                                                                                              |                                                                                                                                                                                                                                                                                                                                                                        |                                                                                     |  |  |  |  |  |  |  |  |
| 10 | Leadership or fiduciary role in other board, society, committee or advocacy group, paid or unpaid            | <input checked="" type="checkbox"/> <b>None</b><br><table border="1" style="width: 100%; border-collapse: collapse;"> <tr><td style="width: 50%; height: 20px;"></td><td style="width: 50%;"></td></tr> <tr><td style="height: 20px;"></td><td></td></tr> <tr><td style="height: 20px;"></td><td></td></tr> </table>                                                   |                                                                                     |  |  |  |  |  |  |  |  |
|    |                                                                                                              |                                                                                                                                                                                                                                                                                                                                                                        |                                                                                     |  |  |  |  |  |  |  |  |
|    |                                                                                                              |                                                                                                                                                                                                                                                                                                                                                                        |                                                                                     |  |  |  |  |  |  |  |  |
|    |                                                                                                              |                                                                                                                                                                                                                                                                                                                                                                        |                                                                                     |  |  |  |  |  |  |  |  |

|           |                                                                                  | Name all entities with whom you have this relationship or indicate none (add rows as needed)                                                                                                                                                                                                             | Specifications/Comments (e.g., if payments were made to you or to your institution) |  |  |  |  |  |  |
|-----------|----------------------------------------------------------------------------------|----------------------------------------------------------------------------------------------------------------------------------------------------------------------------------------------------------------------------------------------------------------------------------------------------------|-------------------------------------------------------------------------------------|--|--|--|--|--|--|
| <b>11</b> | Stock or stock options                                                           | <input checked="" type="checkbox"/> <b>None</b><br><table border="1" style="width: 100%; border-collapse: collapse;"> <tr><td style="height: 20px;"></td><td style="width: 50%;"></td></tr> <tr><td style="height: 20px;"></td><td></td></tr> <tr><td style="height: 20px;"></td><td></td></tr> </table> |                                                                                     |  |  |  |  |  |  |
|           |                                                                                  |                                                                                                                                                                                                                                                                                                          |                                                                                     |  |  |  |  |  |  |
|           |                                                                                  |                                                                                                                                                                                                                                                                                                          |                                                                                     |  |  |  |  |  |  |
|           |                                                                                  |                                                                                                                                                                                                                                                                                                          |                                                                                     |  |  |  |  |  |  |
| <b>12</b> | Receipt of equipment, materials, drugs, medical writing, gifts or other services | <input checked="" type="checkbox"/> <b>None</b><br><table border="1" style="width: 100%; border-collapse: collapse;"> <tr><td style="height: 20px;"></td><td style="width: 50%;"></td></tr> <tr><td style="height: 20px;"></td><td></td></tr> <tr><td style="height: 20px;"></td><td></td></tr> </table> |                                                                                     |  |  |  |  |  |  |
|           |                                                                                  |                                                                                                                                                                                                                                                                                                          |                                                                                     |  |  |  |  |  |  |
|           |                                                                                  |                                                                                                                                                                                                                                                                                                          |                                                                                     |  |  |  |  |  |  |
|           |                                                                                  |                                                                                                                                                                                                                                                                                                          |                                                                                     |  |  |  |  |  |  |
| <b>13</b> | Other financial or non-financial interests                                       | <input checked="" type="checkbox"/> <b>None</b><br><table border="1" style="width: 100%; border-collapse: collapse;"> <tr><td style="height: 20px;"></td><td style="width: 50%;"></td></tr> <tr><td style="height: 20px;"></td><td></td></tr> <tr><td style="height: 20px;"></td><td></td></tr> </table> |                                                                                     |  |  |  |  |  |  |
|           |                                                                                  |                                                                                                                                                                                                                                                                                                          |                                                                                     |  |  |  |  |  |  |
|           |                                                                                  |                                                                                                                                                                                                                                                                                                          |                                                                                     |  |  |  |  |  |  |
|           |                                                                                  |                                                                                                                                                                                                                                                                                                          |                                                                                     |  |  |  |  |  |  |

**Please place an "X" next to the following statement to indicate your agreement:**

I certify that I have answered every question and have not altered the wording of any of the questions on this form.

# ICMJE DISCLOSURE FORM

**Date:** 9/29/2024

**Your Name:** Lingyu Yu

**Manuscript Title:** 68Ga-MY6349 PET/CT imaging to assess Trop2 expression in multiple types of cancer

**Manuscript Number (if known):** 185408-JCI-CMED-RV-2

In the interest of transparency, we ask you to disclose all relationships/activities/interests listed below that are related to the content of your manuscript. "Related" means any relation with for-profit or not-for-profit third parties whose interests may be affected by the content of the manuscript. Disclosure represents a commitment to transparency and does not necessarily indicate a bias. If you are in doubt about whether to list a relationship/activity/interest, it is preferable that you do so.

The author's relationships/activities/interests should be defined broadly. For example, if your manuscript pertains to the epidemiology of hypertension, you should declare all relationships with manufacturers of antihypertensive medication, even if that medication is not mentioned in the manuscript.

In item #1 below, report all support for the work reported in this manuscript without time limit. For all other items, the time frame for disclosure is the past 36 months.

|                                                    |                                                                                                                                                                                | Name all entities with whom you have this relationship or indicate none (add rows as needed)                                                                                                                                                                                                                                                   | Specifications/Comments (e.g., if payments were made to you or to your institution) |  |  |  |  |  |                                           |
|----------------------------------------------------|--------------------------------------------------------------------------------------------------------------------------------------------------------------------------------|------------------------------------------------------------------------------------------------------------------------------------------------------------------------------------------------------------------------------------------------------------------------------------------------------------------------------------------------|-------------------------------------------------------------------------------------|--|--|--|--|--|-------------------------------------------|
| Time frame: Since the initial planning of the work |                                                                                                                                                                                |                                                                                                                                                                                                                                                                                                                                                |                                                                                     |  |  |  |  |  |                                           |
| <b>1</b>                                           | All support for the present manuscript (e.g., funding, provision of study materials, medical writing, article processing charges, etc.)<br><b>No time limit for this item.</b> | <input checked="" type="checkbox"/> <b>None</b><br><table border="1" style="width: 100%; height: 40px; margin-top: 5px;"> <tr><td style="width: 50%;"></td><td style="width: 50%;"></td></tr> <tr><td style="width: 50%;"></td><td style="width: 50%;"></td></tr> <tr><td style="width: 50%;"></td><td style="width: 50%;"></td></tr> </table> |                                                                                     |  |  |  |  |  | Click the tab key to add additional rows. |
|                                                    |                                                                                                                                                                                |                                                                                                                                                                                                                                                                                                                                                |                                                                                     |  |  |  |  |  |                                           |
|                                                    |                                                                                                                                                                                |                                                                                                                                                                                                                                                                                                                                                |                                                                                     |  |  |  |  |  |                                           |
|                                                    |                                                                                                                                                                                |                                                                                                                                                                                                                                                                                                                                                |                                                                                     |  |  |  |  |  |                                           |
| Time frame: past 36 months                         |                                                                                                                                                                                |                                                                                                                                                                                                                                                                                                                                                |                                                                                     |  |  |  |  |  |                                           |
| <b>2</b>                                           | Grants or contracts from any entity (if not indicated in item #1 above).                                                                                                       | <input checked="" type="checkbox"/> <b>None</b><br><table border="1" style="width: 100%; height: 40px; margin-top: 5px;"> <tr><td style="width: 50%;"></td><td style="width: 50%;"></td></tr> <tr><td style="width: 50%;"></td><td style="width: 50%;"></td></tr> <tr><td style="width: 50%;"></td><td style="width: 50%;"></td></tr> </table> |                                                                                     |  |  |  |  |  |                                           |
|                                                    |                                                                                                                                                                                |                                                                                                                                                                                                                                                                                                                                                |                                                                                     |  |  |  |  |  |                                           |
|                                                    |                                                                                                                                                                                |                                                                                                                                                                                                                                                                                                                                                |                                                                                     |  |  |  |  |  |                                           |
|                                                    |                                                                                                                                                                                |                                                                                                                                                                                                                                                                                                                                                |                                                                                     |  |  |  |  |  |                                           |
| <b>3</b>                                           | Royalties or licenses                                                                                                                                                          | <input checked="" type="checkbox"/> <b>None</b><br><table border="1" style="width: 100%; height: 40px; margin-top: 5px;"> <tr><td style="width: 50%;"></td><td style="width: 50%;"></td></tr> <tr><td style="width: 50%;"></td><td style="width: 50%;"></td></tr> <tr><td style="width: 50%;"></td><td style="width: 50%;"></td></tr> </table> |                                                                                     |  |  |  |  |  |                                           |
|                                                    |                                                                                                                                                                                |                                                                                                                                                                                                                                                                                                                                                |                                                                                     |  |  |  |  |  |                                           |
|                                                    |                                                                                                                                                                                |                                                                                                                                                                                                                                                                                                                                                |                                                                                     |  |  |  |  |  |                                           |
|                                                    |                                                                                                                                                                                |                                                                                                                                                                                                                                                                                                                                                |                                                                                     |  |  |  |  |  |                                           |

|    |                                                                                                              | Name all entities with whom you have this relationship or indicate none (add rows as needed)                                                                                                                                                                                                                                                                                                                                                           | Specifications/Comments (e.g., if payments were made to you or to your institution) |  |  |  |  |  |  |  |  |
|----|--------------------------------------------------------------------------------------------------------------|--------------------------------------------------------------------------------------------------------------------------------------------------------------------------------------------------------------------------------------------------------------------------------------------------------------------------------------------------------------------------------------------------------------------------------------------------------|-------------------------------------------------------------------------------------|--|--|--|--|--|--|--|--|
| 4  | Consulting fees                                                                                              | <input checked="" type="checkbox"/> <b>None</b><br><table border="1" style="width: 100%; border-collapse: collapse;"> <tr><td style="width: 50%; height: 20px;"></td><td style="width: 50%; height: 20px;"></td></tr> <tr><td style="height: 20px;"></td><td style="height: 20px;"></td></tr> <tr><td style="height: 20px;"></td><td style="height: 20px;"></td></tr> <tr><td style="height: 20px;"></td><td style="height: 20px;"></td></tr> </table> |                                                                                     |  |  |  |  |  |  |  |  |
|    |                                                                                                              |                                                                                                                                                                                                                                                                                                                                                                                                                                                        |                                                                                     |  |  |  |  |  |  |  |  |
|    |                                                                                                              |                                                                                                                                                                                                                                                                                                                                                                                                                                                        |                                                                                     |  |  |  |  |  |  |  |  |
|    |                                                                                                              |                                                                                                                                                                                                                                                                                                                                                                                                                                                        |                                                                                     |  |  |  |  |  |  |  |  |
|    |                                                                                                              |                                                                                                                                                                                                                                                                                                                                                                                                                                                        |                                                                                     |  |  |  |  |  |  |  |  |
| 5  | Payment or honoraria for lectures, presentations, speakers bureaus, manuscript writing or educational events | <input checked="" type="checkbox"/> <b>None</b><br><table border="1" style="width: 100%; border-collapse: collapse;"> <tr><td style="width: 50%; height: 20px;"></td><td style="width: 50%; height: 20px;"></td></tr> <tr><td style="height: 20px;"></td><td style="height: 20px;"></td></tr> <tr><td style="height: 20px;"></td><td style="height: 20px;"></td></tr> </table>                                                                         |                                                                                     |  |  |  |  |  |  |  |  |
|    |                                                                                                              |                                                                                                                                                                                                                                                                                                                                                                                                                                                        |                                                                                     |  |  |  |  |  |  |  |  |
|    |                                                                                                              |                                                                                                                                                                                                                                                                                                                                                                                                                                                        |                                                                                     |  |  |  |  |  |  |  |  |
|    |                                                                                                              |                                                                                                                                                                                                                                                                                                                                                                                                                                                        |                                                                                     |  |  |  |  |  |  |  |  |
| 6  | Payment for expert testimony                                                                                 | <input checked="" type="checkbox"/> <b>None</b><br><table border="1" style="width: 100%; border-collapse: collapse;"> <tr><td style="width: 50%; height: 20px;"></td><td style="width: 50%; height: 20px;"></td></tr> <tr><td style="height: 20px;"></td><td style="height: 20px;"></td></tr> <tr><td style="height: 20px;"></td><td style="height: 20px;"></td></tr> </table>                                                                         |                                                                                     |  |  |  |  |  |  |  |  |
|    |                                                                                                              |                                                                                                                                                                                                                                                                                                                                                                                                                                                        |                                                                                     |  |  |  |  |  |  |  |  |
|    |                                                                                                              |                                                                                                                                                                                                                                                                                                                                                                                                                                                        |                                                                                     |  |  |  |  |  |  |  |  |
|    |                                                                                                              |                                                                                                                                                                                                                                                                                                                                                                                                                                                        |                                                                                     |  |  |  |  |  |  |  |  |
| 7  | Support for attending meetings and/or travel                                                                 | <input checked="" type="checkbox"/> <b>None</b><br><table border="1" style="width: 100%; border-collapse: collapse;"> <tr><td style="width: 50%; height: 20px;"></td><td style="width: 50%; height: 20px;"></td></tr> <tr><td style="height: 20px;"></td><td style="height: 20px;"></td></tr> <tr><td style="height: 20px;"></td><td style="height: 20px;"></td></tr> </table>                                                                         |                                                                                     |  |  |  |  |  |  |  |  |
|    |                                                                                                              |                                                                                                                                                                                                                                                                                                                                                                                                                                                        |                                                                                     |  |  |  |  |  |  |  |  |
|    |                                                                                                              |                                                                                                                                                                                                                                                                                                                                                                                                                                                        |                                                                                     |  |  |  |  |  |  |  |  |
|    |                                                                                                              |                                                                                                                                                                                                                                                                                                                                                                                                                                                        |                                                                                     |  |  |  |  |  |  |  |  |
| 8  | Patents planned, issued or pending                                                                           | <input checked="" type="checkbox"/> <b>None</b><br><table border="1" style="width: 100%; border-collapse: collapse;"> <tr><td style="width: 50%; height: 20px;"></td><td style="width: 50%; height: 20px;"></td></tr> <tr><td style="height: 20px;"></td><td style="height: 20px;"></td></tr> <tr><td style="height: 20px;"></td><td style="height: 20px;"></td></tr> </table>                                                                         |                                                                                     |  |  |  |  |  |  |  |  |
|    |                                                                                                              |                                                                                                                                                                                                                                                                                                                                                                                                                                                        |                                                                                     |  |  |  |  |  |  |  |  |
|    |                                                                                                              |                                                                                                                                                                                                                                                                                                                                                                                                                                                        |                                                                                     |  |  |  |  |  |  |  |  |
|    |                                                                                                              |                                                                                                                                                                                                                                                                                                                                                                                                                                                        |                                                                                     |  |  |  |  |  |  |  |  |
| 9  | Participation on a Data Safety Monitoring Board or Advisory Board                                            | <input checked="" type="checkbox"/> <b>None</b><br><table border="1" style="width: 100%; border-collapse: collapse;"> <tr><td style="width: 50%; height: 20px;"></td><td style="width: 50%; height: 20px;"></td></tr> <tr><td style="height: 20px;"></td><td style="height: 20px;"></td></tr> <tr><td style="height: 20px;"></td><td style="height: 20px;"></td></tr> </table>                                                                         |                                                                                     |  |  |  |  |  |  |  |  |
|    |                                                                                                              |                                                                                                                                                                                                                                                                                                                                                                                                                                                        |                                                                                     |  |  |  |  |  |  |  |  |
|    |                                                                                                              |                                                                                                                                                                                                                                                                                                                                                                                                                                                        |                                                                                     |  |  |  |  |  |  |  |  |
|    |                                                                                                              |                                                                                                                                                                                                                                                                                                                                                                                                                                                        |                                                                                     |  |  |  |  |  |  |  |  |
| 10 | Leadership or fiduciary role in other board, society, committee or advocacy group, paid or unpaid            | <input checked="" type="checkbox"/> <b>None</b><br><table border="1" style="width: 100%; border-collapse: collapse;"> <tr><td style="width: 50%; height: 20px;"></td><td style="width: 50%; height: 20px;"></td></tr> <tr><td style="height: 20px;"></td><td style="height: 20px;"></td></tr> <tr><td style="height: 20px;"></td><td style="height: 20px;"></td></tr> </table>                                                                         |                                                                                     |  |  |  |  |  |  |  |  |
|    |                                                                                                              |                                                                                                                                                                                                                                                                                                                                                                                                                                                        |                                                                                     |  |  |  |  |  |  |  |  |
|    |                                                                                                              |                                                                                                                                                                                                                                                                                                                                                                                                                                                        |                                                                                     |  |  |  |  |  |  |  |  |
|    |                                                                                                              |                                                                                                                                                                                                                                                                                                                                                                                                                                                        |                                                                                     |  |  |  |  |  |  |  |  |

|           |                                                                                  | Name all entities with whom you have this relationship or indicate none (add rows as needed)                                                                                                                                                                                                                         | Specifications/Comments (e.g., if payments were made to you or to your institution) |  |  |  |  |  |  |
|-----------|----------------------------------------------------------------------------------|----------------------------------------------------------------------------------------------------------------------------------------------------------------------------------------------------------------------------------------------------------------------------------------------------------------------|-------------------------------------------------------------------------------------|--|--|--|--|--|--|
| <b>11</b> | Stock or stock options                                                           | <input checked="" type="checkbox"/> <b>None</b><br><table border="1" style="width: 100%; border-collapse: collapse;"> <tr><td style="width: 50%; height: 20px;"></td><td style="width: 50%;"></td></tr> <tr><td style="height: 20px;"></td><td></td></tr> <tr><td style="height: 20px;"></td><td></td></tr> </table> |                                                                                     |  |  |  |  |  |  |
|           |                                                                                  |                                                                                                                                                                                                                                                                                                                      |                                                                                     |  |  |  |  |  |  |
|           |                                                                                  |                                                                                                                                                                                                                                                                                                                      |                                                                                     |  |  |  |  |  |  |
|           |                                                                                  |                                                                                                                                                                                                                                                                                                                      |                                                                                     |  |  |  |  |  |  |
| <b>12</b> | Receipt of equipment, materials, drugs, medical writing, gifts or other services | <input checked="" type="checkbox"/> <b>None</b><br><table border="1" style="width: 100%; border-collapse: collapse;"> <tr><td style="width: 50%; height: 20px;"></td><td style="width: 50%;"></td></tr> <tr><td style="height: 20px;"></td><td></td></tr> <tr><td style="height: 20px;"></td><td></td></tr> </table> |                                                                                     |  |  |  |  |  |  |
|           |                                                                                  |                                                                                                                                                                                                                                                                                                                      |                                                                                     |  |  |  |  |  |  |
|           |                                                                                  |                                                                                                                                                                                                                                                                                                                      |                                                                                     |  |  |  |  |  |  |
|           |                                                                                  |                                                                                                                                                                                                                                                                                                                      |                                                                                     |  |  |  |  |  |  |
| <b>13</b> | Other financial or non-financial interests                                       | <input checked="" type="checkbox"/> <b>None</b><br><table border="1" style="width: 100%; border-collapse: collapse;"> <tr><td style="width: 50%; height: 20px;"></td><td style="width: 50%;"></td></tr> <tr><td style="height: 20px;"></td><td></td></tr> <tr><td style="height: 20px;"></td><td></td></tr> </table> |                                                                                     |  |  |  |  |  |  |
|           |                                                                                  |                                                                                                                                                                                                                                                                                                                      |                                                                                     |  |  |  |  |  |  |
|           |                                                                                  |                                                                                                                                                                                                                                                                                                                      |                                                                                     |  |  |  |  |  |  |
|           |                                                                                  |                                                                                                                                                                                                                                                                                                                      |                                                                                     |  |  |  |  |  |  |

**Please place an "X" next to the following statement to indicate your agreement:**

I certify that I have answered every question and have not altered the wording of any of the questions on this form.

## ICMJE DISCLOSURE FORM

**Date:** 9/29/2024

**Your Name:** Ru Zeng

**Manuscript Title:** 68Ga-MY6349 PET/CT imaging to assess Trop2 expression in multiple types of cancer

**Manuscript Number (if known):** 185408-JCI-CMED-RV-2

In the interest of transparency, we ask you to disclose all relationships/activities/interests listed below that are related to the content of your manuscript. "Related" means any relation with for-profit or not-for-profit third parties whose interests may be affected by the content of the manuscript. Disclosure represents a commitment to transparency and does not necessarily indicate a bias. If you are in doubt about whether to list a relationship/activity/interest, it is preferable that you do so.

The author's relationships/activities/interests should be defined broadly. For example, if your manuscript pertains to the epidemiology of hypertension, you should declare all relationships with manufacturers of antihypertensive medication, even if that medication is not mentioned in the manuscript.

In item #1 below, report all support for the work reported in this manuscript without time limit. For all other items, the time frame for disclosure is the past 36 months.

|                                                    |                                                                                                                                                                                | Name all entities with whom you have this relationship or indicate none (add rows as needed)                                                                                                                                                                                                                                                   | Specifications/Comments (e.g., if payments were made to you or to your institution) |  |  |  |  |  |                                                                                                                                                                                                                                                                                                                                                                                                      |  |  |  |  |  |  |
|----------------------------------------------------|--------------------------------------------------------------------------------------------------------------------------------------------------------------------------------|------------------------------------------------------------------------------------------------------------------------------------------------------------------------------------------------------------------------------------------------------------------------------------------------------------------------------------------------|-------------------------------------------------------------------------------------|--|--|--|--|--|------------------------------------------------------------------------------------------------------------------------------------------------------------------------------------------------------------------------------------------------------------------------------------------------------------------------------------------------------------------------------------------------------|--|--|--|--|--|--|
| Time frame: Since the initial planning of the work |                                                                                                                                                                                |                                                                                                                                                                                                                                                                                                                                                |                                                                                     |  |  |  |  |  |                                                                                                                                                                                                                                                                                                                                                                                                      |  |  |  |  |  |  |
| <b>1</b>                                           | All support for the present manuscript (e.g., funding, provision of study materials, medical writing, article processing charges, etc.)<br><b>No time limit for this item.</b> | <input checked="" type="checkbox"/> <b>None</b><br><table border="1" style="width: 100%; height: 40px; margin-top: 5px;"> <tr><td style="width: 50%;"></td><td style="width: 50%;"></td></tr> <tr><td style="width: 50%;"></td><td style="width: 50%;"></td></tr> <tr><td style="width: 50%;"></td><td style="width: 50%;"></td></tr> </table> |                                                                                     |  |  |  |  |  | <table border="1" style="width: 100%; height: 40px; margin-top: 5px;"> <tr><td style="width: 50%;"></td><td style="width: 50%;"></td></tr> <tr><td style="width: 50%;"></td><td style="width: 50%;"></td></tr> <tr><td style="width: 50%;"></td><td style="width: 50%;"></td></tr> </table> <p style="font-size: small; color: gray; margin-top: 5px;">Click the tab key to add additional rows.</p> |  |  |  |  |  |  |
|                                                    |                                                                                                                                                                                |                                                                                                                                                                                                                                                                                                                                                |                                                                                     |  |  |  |  |  |                                                                                                                                                                                                                                                                                                                                                                                                      |  |  |  |  |  |  |
|                                                    |                                                                                                                                                                                |                                                                                                                                                                                                                                                                                                                                                |                                                                                     |  |  |  |  |  |                                                                                                                                                                                                                                                                                                                                                                                                      |  |  |  |  |  |  |
|                                                    |                                                                                                                                                                                |                                                                                                                                                                                                                                                                                                                                                |                                                                                     |  |  |  |  |  |                                                                                                                                                                                                                                                                                                                                                                                                      |  |  |  |  |  |  |
|                                                    |                                                                                                                                                                                |                                                                                                                                                                                                                                                                                                                                                |                                                                                     |  |  |  |  |  |                                                                                                                                                                                                                                                                                                                                                                                                      |  |  |  |  |  |  |
|                                                    |                                                                                                                                                                                |                                                                                                                                                                                                                                                                                                                                                |                                                                                     |  |  |  |  |  |                                                                                                                                                                                                                                                                                                                                                                                                      |  |  |  |  |  |  |
|                                                    |                                                                                                                                                                                |                                                                                                                                                                                                                                                                                                                                                |                                                                                     |  |  |  |  |  |                                                                                                                                                                                                                                                                                                                                                                                                      |  |  |  |  |  |  |
| Time frame: past 36 months                         |                                                                                                                                                                                |                                                                                                                                                                                                                                                                                                                                                |                                                                                     |  |  |  |  |  |                                                                                                                                                                                                                                                                                                                                                                                                      |  |  |  |  |  |  |
| <b>2</b>                                           | Grants or contracts from any entity (if not indicated in item #1 above).                                                                                                       | <input checked="" type="checkbox"/> <b>None</b><br><table border="1" style="width: 100%; height: 40px; margin-top: 5px;"> <tr><td style="width: 50%;"></td><td style="width: 50%;"></td></tr> <tr><td style="width: 50%;"></td><td style="width: 50%;"></td></tr> <tr><td style="width: 50%;"></td><td style="width: 50%;"></td></tr> </table> |                                                                                     |  |  |  |  |  | <table border="1" style="width: 100%; height: 40px; margin-top: 5px;"> <tr><td style="width: 50%;"></td><td style="width: 50%;"></td></tr> <tr><td style="width: 50%;"></td><td style="width: 50%;"></td></tr> <tr><td style="width: 50%;"></td><td style="width: 50%;"></td></tr> </table>                                                                                                          |  |  |  |  |  |  |
|                                                    |                                                                                                                                                                                |                                                                                                                                                                                                                                                                                                                                                |                                                                                     |  |  |  |  |  |                                                                                                                                                                                                                                                                                                                                                                                                      |  |  |  |  |  |  |
|                                                    |                                                                                                                                                                                |                                                                                                                                                                                                                                                                                                                                                |                                                                                     |  |  |  |  |  |                                                                                                                                                                                                                                                                                                                                                                                                      |  |  |  |  |  |  |
|                                                    |                                                                                                                                                                                |                                                                                                                                                                                                                                                                                                                                                |                                                                                     |  |  |  |  |  |                                                                                                                                                                                                                                                                                                                                                                                                      |  |  |  |  |  |  |
|                                                    |                                                                                                                                                                                |                                                                                                                                                                                                                                                                                                                                                |                                                                                     |  |  |  |  |  |                                                                                                                                                                                                                                                                                                                                                                                                      |  |  |  |  |  |  |
|                                                    |                                                                                                                                                                                |                                                                                                                                                                                                                                                                                                                                                |                                                                                     |  |  |  |  |  |                                                                                                                                                                                                                                                                                                                                                                                                      |  |  |  |  |  |  |
|                                                    |                                                                                                                                                                                |                                                                                                                                                                                                                                                                                                                                                |                                                                                     |  |  |  |  |  |                                                                                                                                                                                                                                                                                                                                                                                                      |  |  |  |  |  |  |
| <b>3</b>                                           | Royalties or licenses                                                                                                                                                          | <input checked="" type="checkbox"/> <b>None</b><br><table border="1" style="width: 100%; height: 40px; margin-top: 5px;"> <tr><td style="width: 50%;"></td><td style="width: 50%;"></td></tr> <tr><td style="width: 50%;"></td><td style="width: 50%;"></td></tr> <tr><td style="width: 50%;"></td><td style="width: 50%;"></td></tr> </table> |                                                                                     |  |  |  |  |  | <table border="1" style="width: 100%; height: 40px; margin-top: 5px;"> <tr><td style="width: 50%;"></td><td style="width: 50%;"></td></tr> <tr><td style="width: 50%;"></td><td style="width: 50%;"></td></tr> <tr><td style="width: 50%;"></td><td style="width: 50%;"></td></tr> </table>                                                                                                          |  |  |  |  |  |  |
|                                                    |                                                                                                                                                                                |                                                                                                                                                                                                                                                                                                                                                |                                                                                     |  |  |  |  |  |                                                                                                                                                                                                                                                                                                                                                                                                      |  |  |  |  |  |  |
|                                                    |                                                                                                                                                                                |                                                                                                                                                                                                                                                                                                                                                |                                                                                     |  |  |  |  |  |                                                                                                                                                                                                                                                                                                                                                                                                      |  |  |  |  |  |  |
|                                                    |                                                                                                                                                                                |                                                                                                                                                                                                                                                                                                                                                |                                                                                     |  |  |  |  |  |                                                                                                                                                                                                                                                                                                                                                                                                      |  |  |  |  |  |  |
|                                                    |                                                                                                                                                                                |                                                                                                                                                                                                                                                                                                                                                |                                                                                     |  |  |  |  |  |                                                                                                                                                                                                                                                                                                                                                                                                      |  |  |  |  |  |  |
|                                                    |                                                                                                                                                                                |                                                                                                                                                                                                                                                                                                                                                |                                                                                     |  |  |  |  |  |                                                                                                                                                                                                                                                                                                                                                                                                      |  |  |  |  |  |  |
|                                                    |                                                                                                                                                                                |                                                                                                                                                                                                                                                                                                                                                |                                                                                     |  |  |  |  |  |                                                                                                                                                                                                                                                                                                                                                                                                      |  |  |  |  |  |  |

|    |                                                                                                              | Name all entities with whom you have this relationship or indicate none (add rows as needed)                                                                                                                                                                                                                                                                           | Specifications/Comments (e.g., if payments were made to you or to your institution) |  |  |  |  |  |  |  |  |
|----|--------------------------------------------------------------------------------------------------------------|------------------------------------------------------------------------------------------------------------------------------------------------------------------------------------------------------------------------------------------------------------------------------------------------------------------------------------------------------------------------|-------------------------------------------------------------------------------------|--|--|--|--|--|--|--|--|
| 4  | Consulting fees                                                                                              | <input checked="" type="checkbox"/> <b>None</b><br><table border="1" style="width: 100%; border-collapse: collapse;"> <tr><td style="width: 50%; height: 20px;"></td><td style="width: 50%;"></td></tr> <tr><td style="height: 20px;"></td><td></td></tr> <tr><td style="height: 20px;"></td><td></td></tr> <tr><td style="height: 20px;"></td><td></td></tr> </table> |                                                                                     |  |  |  |  |  |  |  |  |
|    |                                                                                                              |                                                                                                                                                                                                                                                                                                                                                                        |                                                                                     |  |  |  |  |  |  |  |  |
|    |                                                                                                              |                                                                                                                                                                                                                                                                                                                                                                        |                                                                                     |  |  |  |  |  |  |  |  |
|    |                                                                                                              |                                                                                                                                                                                                                                                                                                                                                                        |                                                                                     |  |  |  |  |  |  |  |  |
|    |                                                                                                              |                                                                                                                                                                                                                                                                                                                                                                        |                                                                                     |  |  |  |  |  |  |  |  |
| 5  | Payment or honoraria for lectures, presentations, speakers bureaus, manuscript writing or educational events | <input checked="" type="checkbox"/> <b>None</b><br><table border="1" style="width: 100%; border-collapse: collapse;"> <tr><td style="width: 50%; height: 20px;"></td><td style="width: 50%;"></td></tr> <tr><td style="height: 20px;"></td><td></td></tr> <tr><td style="height: 20px;"></td><td></td></tr> </table>                                                   |                                                                                     |  |  |  |  |  |  |  |  |
|    |                                                                                                              |                                                                                                                                                                                                                                                                                                                                                                        |                                                                                     |  |  |  |  |  |  |  |  |
|    |                                                                                                              |                                                                                                                                                                                                                                                                                                                                                                        |                                                                                     |  |  |  |  |  |  |  |  |
|    |                                                                                                              |                                                                                                                                                                                                                                                                                                                                                                        |                                                                                     |  |  |  |  |  |  |  |  |
| 6  | Payment for expert testimony                                                                                 | <input checked="" type="checkbox"/> <b>None</b><br><table border="1" style="width: 100%; border-collapse: collapse;"> <tr><td style="width: 50%; height: 20px;"></td><td style="width: 50%;"></td></tr> <tr><td style="height: 20px;"></td><td></td></tr> <tr><td style="height: 20px;"></td><td></td></tr> </table>                                                   |                                                                                     |  |  |  |  |  |  |  |  |
|    |                                                                                                              |                                                                                                                                                                                                                                                                                                                                                                        |                                                                                     |  |  |  |  |  |  |  |  |
|    |                                                                                                              |                                                                                                                                                                                                                                                                                                                                                                        |                                                                                     |  |  |  |  |  |  |  |  |
|    |                                                                                                              |                                                                                                                                                                                                                                                                                                                                                                        |                                                                                     |  |  |  |  |  |  |  |  |
| 7  | Support for attending meetings and/or travel                                                                 | <input checked="" type="checkbox"/> <b>None</b><br><table border="1" style="width: 100%; border-collapse: collapse;"> <tr><td style="width: 50%; height: 20px;"></td><td style="width: 50%;"></td></tr> <tr><td style="height: 20px;"></td><td></td></tr> <tr><td style="height: 20px;"></td><td></td></tr> </table>                                                   |                                                                                     |  |  |  |  |  |  |  |  |
|    |                                                                                                              |                                                                                                                                                                                                                                                                                                                                                                        |                                                                                     |  |  |  |  |  |  |  |  |
|    |                                                                                                              |                                                                                                                                                                                                                                                                                                                                                                        |                                                                                     |  |  |  |  |  |  |  |  |
|    |                                                                                                              |                                                                                                                                                                                                                                                                                                                                                                        |                                                                                     |  |  |  |  |  |  |  |  |
| 8  | Patents planned, issued or pending                                                                           | <input checked="" type="checkbox"/> <b>None</b><br><table border="1" style="width: 100%; border-collapse: collapse;"> <tr><td style="width: 50%; height: 20px;"></td><td style="width: 50%;"></td></tr> <tr><td style="height: 20px;"></td><td></td></tr> <tr><td style="height: 20px;"></td><td></td></tr> </table>                                                   |                                                                                     |  |  |  |  |  |  |  |  |
|    |                                                                                                              |                                                                                                                                                                                                                                                                                                                                                                        |                                                                                     |  |  |  |  |  |  |  |  |
|    |                                                                                                              |                                                                                                                                                                                                                                                                                                                                                                        |                                                                                     |  |  |  |  |  |  |  |  |
|    |                                                                                                              |                                                                                                                                                                                                                                                                                                                                                                        |                                                                                     |  |  |  |  |  |  |  |  |
| 9  | Participation on a Data Safety Monitoring Board or Advisory Board                                            | <input checked="" type="checkbox"/> <b>None</b><br><table border="1" style="width: 100%; border-collapse: collapse;"> <tr><td style="width: 50%; height: 20px;"></td><td style="width: 50%;"></td></tr> <tr><td style="height: 20px;"></td><td></td></tr> <tr><td style="height: 20px;"></td><td></td></tr> </table>                                                   |                                                                                     |  |  |  |  |  |  |  |  |
|    |                                                                                                              |                                                                                                                                                                                                                                                                                                                                                                        |                                                                                     |  |  |  |  |  |  |  |  |
|    |                                                                                                              |                                                                                                                                                                                                                                                                                                                                                                        |                                                                                     |  |  |  |  |  |  |  |  |
|    |                                                                                                              |                                                                                                                                                                                                                                                                                                                                                                        |                                                                                     |  |  |  |  |  |  |  |  |
| 10 | Leadership or fiduciary role in other board, society, committee or advocacy group, paid or unpaid            | <input checked="" type="checkbox"/> <b>None</b><br><table border="1" style="width: 100%; border-collapse: collapse;"> <tr><td style="width: 50%; height: 20px;"></td><td style="width: 50%;"></td></tr> <tr><td style="height: 20px;"></td><td></td></tr> <tr><td style="height: 20px;"></td><td></td></tr> </table>                                                   |                                                                                     |  |  |  |  |  |  |  |  |
|    |                                                                                                              |                                                                                                                                                                                                                                                                                                                                                                        |                                                                                     |  |  |  |  |  |  |  |  |
|    |                                                                                                              |                                                                                                                                                                                                                                                                                                                                                                        |                                                                                     |  |  |  |  |  |  |  |  |
|    |                                                                                                              |                                                                                                                                                                                                                                                                                                                                                                        |                                                                                     |  |  |  |  |  |  |  |  |

|           |                                                                                  | Name all entities with whom you have this relationship or indicate none (add rows as needed)                                                                                                                                                                                                                         | Specifications/Comments (e.g., if payments were made to you or to your institution) |  |  |  |  |  |  |
|-----------|----------------------------------------------------------------------------------|----------------------------------------------------------------------------------------------------------------------------------------------------------------------------------------------------------------------------------------------------------------------------------------------------------------------|-------------------------------------------------------------------------------------|--|--|--|--|--|--|
| <b>11</b> | Stock or stock options                                                           | <input checked="" type="checkbox"/> <b>None</b><br><table border="1" style="width: 100%; border-collapse: collapse;"> <tr><td style="width: 50%; height: 20px;"></td><td style="width: 50%;"></td></tr> <tr><td style="height: 20px;"></td><td></td></tr> <tr><td style="height: 20px;"></td><td></td></tr> </table> |                                                                                     |  |  |  |  |  |  |
|           |                                                                                  |                                                                                                                                                                                                                                                                                                                      |                                                                                     |  |  |  |  |  |  |
|           |                                                                                  |                                                                                                                                                                                                                                                                                                                      |                                                                                     |  |  |  |  |  |  |
|           |                                                                                  |                                                                                                                                                                                                                                                                                                                      |                                                                                     |  |  |  |  |  |  |
| <b>12</b> | Receipt of equipment, materials, drugs, medical writing, gifts or other services | <input checked="" type="checkbox"/> <b>None</b><br><table border="1" style="width: 100%; border-collapse: collapse;"> <tr><td style="width: 50%; height: 20px;"></td><td style="width: 50%;"></td></tr> <tr><td style="height: 20px;"></td><td></td></tr> <tr><td style="height: 20px;"></td><td></td></tr> </table> |                                                                                     |  |  |  |  |  |  |
|           |                                                                                  |                                                                                                                                                                                                                                                                                                                      |                                                                                     |  |  |  |  |  |  |
|           |                                                                                  |                                                                                                                                                                                                                                                                                                                      |                                                                                     |  |  |  |  |  |  |
|           |                                                                                  |                                                                                                                                                                                                                                                                                                                      |                                                                                     |  |  |  |  |  |  |
| <b>13</b> | Other financial or non-financial interests                                       | <input checked="" type="checkbox"/> <b>None</b><br><table border="1" style="width: 100%; border-collapse: collapse;"> <tr><td style="width: 50%; height: 20px;"></td><td style="width: 50%;"></td></tr> <tr><td style="height: 20px;"></td><td></td></tr> <tr><td style="height: 20px;"></td><td></td></tr> </table> |                                                                                     |  |  |  |  |  |  |
|           |                                                                                  |                                                                                                                                                                                                                                                                                                                      |                                                                                     |  |  |  |  |  |  |
|           |                                                                                  |                                                                                                                                                                                                                                                                                                                      |                                                                                     |  |  |  |  |  |  |
|           |                                                                                  |                                                                                                                                                                                                                                                                                                                      |                                                                                     |  |  |  |  |  |  |

**Please place an "X" next to the following statement to indicate your agreement:**

I certify that I have answered every question and have not altered the wording of any of the questions on this form.

# ICMJE DISCLOSURE FORM

**Date:** 9/29/2024

**Your Name:** Long Sun

**Manuscript Title:** 68Ga-MY6349 PET/CT imaging to assess Trop2 expression in multiple types of cancer

**Manuscript Number (if known):** 185408-JCI-CMED-RV-2

In the interest of transparency, we ask you to disclose all relationships/activities/interests listed below that are related to the content of your manuscript. "Related" means any relation with for-profit or not-for-profit third parties whose interests may be affected by the content of the manuscript. Disclosure represents a commitment to transparency and does not necessarily indicate a bias. If you are in doubt about whether to list a relationship/activity/interest, it is preferable that you do so.

The author's relationships/activities/interests should be defined broadly. For example, if your manuscript pertains to the epidemiology of hypertension, you should declare all relationships with manufacturers of antihypertensive medication, even if that medication is not mentioned in the manuscript.

In item #1 below, report all support for the work reported in this manuscript without time limit. For all other items, the time frame for disclosure is the past 36 months.

|                                                           |                                                                                                                                                                                | Name all entities with whom you have this relationship or indicate none (add rows as needed)                                                                                                                                               | Specifications/Comments (e.g., if payments were made to you or to your institution) |  |  |  |  |  |                                                                                                                 |
|-----------------------------------------------------------|--------------------------------------------------------------------------------------------------------------------------------------------------------------------------------|--------------------------------------------------------------------------------------------------------------------------------------------------------------------------------------------------------------------------------------------|-------------------------------------------------------------------------------------|--|--|--|--|--|-----------------------------------------------------------------------------------------------------------------|
| <b>Time frame: Since the initial planning of the work</b> |                                                                                                                                                                                |                                                                                                                                                                                                                                            |                                                                                     |  |  |  |  |  |                                                                                                                 |
| <b>1</b>                                                  | All support for the present manuscript (e.g., funding, provision of study materials, medical writing, article processing charges, etc.)<br><b>No time limit for this item.</b> | <input checked="" type="checkbox"/> <b>None</b><br><table border="1" style="width: 100%; height: 40px; margin-top: 5px;"> <tr><td style="width: 60%;"></td><td></td></tr> <tr><td></td><td></td></tr> <tr><td></td><td></td></tr> </table> |                                                                                     |  |  |  |  |  | <div style="font-size: small; color: #ccc; text-align: center;">Click the tab key to add additional rows.</div> |
|                                                           |                                                                                                                                                                                |                                                                                                                                                                                                                                            |                                                                                     |  |  |  |  |  |                                                                                                                 |
|                                                           |                                                                                                                                                                                |                                                                                                                                                                                                                                            |                                                                                     |  |  |  |  |  |                                                                                                                 |
|                                                           |                                                                                                                                                                                |                                                                                                                                                                                                                                            |                                                                                     |  |  |  |  |  |                                                                                                                 |
| <b>Time frame: past 36 months</b>                         |                                                                                                                                                                                |                                                                                                                                                                                                                                            |                                                                                     |  |  |  |  |  |                                                                                                                 |
| <b>2</b>                                                  | Grants or contracts from any entity (if not indicated in item #1 above).                                                                                                       | <input checked="" type="checkbox"/> <b>None</b><br><table border="1" style="width: 100%; height: 40px; margin-top: 5px;"> <tr><td style="width: 60%;"></td><td></td></tr> <tr><td></td><td></td></tr> <tr><td></td><td></td></tr> </table> |                                                                                     |  |  |  |  |  |                                                                                                                 |
|                                                           |                                                                                                                                                                                |                                                                                                                                                                                                                                            |                                                                                     |  |  |  |  |  |                                                                                                                 |
|                                                           |                                                                                                                                                                                |                                                                                                                                                                                                                                            |                                                                                     |  |  |  |  |  |                                                                                                                 |
|                                                           |                                                                                                                                                                                |                                                                                                                                                                                                                                            |                                                                                     |  |  |  |  |  |                                                                                                                 |
| <b>3</b>                                                  | Royalties or licenses                                                                                                                                                          | <input checked="" type="checkbox"/> <b>None</b><br><table border="1" style="width: 100%; height: 40px; margin-top: 5px;"> <tr><td style="width: 60%;"></td><td></td></tr> <tr><td></td><td></td></tr> <tr><td></td><td></td></tr> </table> |                                                                                     |  |  |  |  |  |                                                                                                                 |
|                                                           |                                                                                                                                                                                |                                                                                                                                                                                                                                            |                                                                                     |  |  |  |  |  |                                                                                                                 |
|                                                           |                                                                                                                                                                                |                                                                                                                                                                                                                                            |                                                                                     |  |  |  |  |  |                                                                                                                 |
|                                                           |                                                                                                                                                                                |                                                                                                                                                                                                                                            |                                                                                     |  |  |  |  |  |                                                                                                                 |

|    |                                                                                                              | Name all entities with whom you have this relationship or indicate none (add rows as needed)                                                                                                                                                                                                                                                                           | Specifications/Comments (e.g., if payments were made to you or to your institution) |  |  |  |  |  |  |  |  |
|----|--------------------------------------------------------------------------------------------------------------|------------------------------------------------------------------------------------------------------------------------------------------------------------------------------------------------------------------------------------------------------------------------------------------------------------------------------------------------------------------------|-------------------------------------------------------------------------------------|--|--|--|--|--|--|--|--|
| 4  | Consulting fees                                                                                              | <input checked="" type="checkbox"/> <b>None</b><br><table border="1" style="width: 100%; border-collapse: collapse;"> <tr><td style="width: 50%; height: 20px;"></td><td style="width: 50%;"></td></tr> <tr><td style="height: 20px;"></td><td></td></tr> <tr><td style="height: 20px;"></td><td></td></tr> <tr><td style="height: 20px;"></td><td></td></tr> </table> |                                                                                     |  |  |  |  |  |  |  |  |
|    |                                                                                                              |                                                                                                                                                                                                                                                                                                                                                                        |                                                                                     |  |  |  |  |  |  |  |  |
|    |                                                                                                              |                                                                                                                                                                                                                                                                                                                                                                        |                                                                                     |  |  |  |  |  |  |  |  |
|    |                                                                                                              |                                                                                                                                                                                                                                                                                                                                                                        |                                                                                     |  |  |  |  |  |  |  |  |
|    |                                                                                                              |                                                                                                                                                                                                                                                                                                                                                                        |                                                                                     |  |  |  |  |  |  |  |  |
| 5  | Payment or honoraria for lectures, presentations, speakers bureaus, manuscript writing or educational events | <input checked="" type="checkbox"/> <b>None</b><br><table border="1" style="width: 100%; border-collapse: collapse;"> <tr><td style="width: 50%; height: 20px;"></td><td style="width: 50%;"></td></tr> <tr><td style="height: 20px;"></td><td></td></tr> <tr><td style="height: 20px;"></td><td></td></tr> </table>                                                   |                                                                                     |  |  |  |  |  |  |  |  |
|    |                                                                                                              |                                                                                                                                                                                                                                                                                                                                                                        |                                                                                     |  |  |  |  |  |  |  |  |
|    |                                                                                                              |                                                                                                                                                                                                                                                                                                                                                                        |                                                                                     |  |  |  |  |  |  |  |  |
|    |                                                                                                              |                                                                                                                                                                                                                                                                                                                                                                        |                                                                                     |  |  |  |  |  |  |  |  |
| 6  | Payment for expert testimony                                                                                 | <input checked="" type="checkbox"/> <b>None</b><br><table border="1" style="width: 100%; border-collapse: collapse;"> <tr><td style="width: 50%; height: 20px;"></td><td style="width: 50%;"></td></tr> <tr><td style="height: 20px;"></td><td></td></tr> <tr><td style="height: 20px;"></td><td></td></tr> </table>                                                   |                                                                                     |  |  |  |  |  |  |  |  |
|    |                                                                                                              |                                                                                                                                                                                                                                                                                                                                                                        |                                                                                     |  |  |  |  |  |  |  |  |
|    |                                                                                                              |                                                                                                                                                                                                                                                                                                                                                                        |                                                                                     |  |  |  |  |  |  |  |  |
|    |                                                                                                              |                                                                                                                                                                                                                                                                                                                                                                        |                                                                                     |  |  |  |  |  |  |  |  |
| 7  | Support for attending meetings and/or travel                                                                 | <input checked="" type="checkbox"/> <b>None</b><br><table border="1" style="width: 100%; border-collapse: collapse;"> <tr><td style="width: 50%; height: 20px;"></td><td style="width: 50%;"></td></tr> <tr><td style="height: 20px;"></td><td></td></tr> <tr><td style="height: 20px;"></td><td></td></tr> </table>                                                   |                                                                                     |  |  |  |  |  |  |  |  |
|    |                                                                                                              |                                                                                                                                                                                                                                                                                                                                                                        |                                                                                     |  |  |  |  |  |  |  |  |
|    |                                                                                                              |                                                                                                                                                                                                                                                                                                                                                                        |                                                                                     |  |  |  |  |  |  |  |  |
|    |                                                                                                              |                                                                                                                                                                                                                                                                                                                                                                        |                                                                                     |  |  |  |  |  |  |  |  |
| 8  | Patents planned, issued or pending                                                                           | <input checked="" type="checkbox"/> <b>None</b><br><table border="1" style="width: 100%; border-collapse: collapse;"> <tr><td style="width: 50%; height: 20px;"></td><td style="width: 50%;"></td></tr> <tr><td style="height: 20px;"></td><td></td></tr> <tr><td style="height: 20px;"></td><td></td></tr> </table>                                                   |                                                                                     |  |  |  |  |  |  |  |  |
|    |                                                                                                              |                                                                                                                                                                                                                                                                                                                                                                        |                                                                                     |  |  |  |  |  |  |  |  |
|    |                                                                                                              |                                                                                                                                                                                                                                                                                                                                                                        |                                                                                     |  |  |  |  |  |  |  |  |
|    |                                                                                                              |                                                                                                                                                                                                                                                                                                                                                                        |                                                                                     |  |  |  |  |  |  |  |  |
| 9  | Participation on a Data Safety Monitoring Board or Advisory Board                                            | <input checked="" type="checkbox"/> <b>None</b><br><table border="1" style="width: 100%; border-collapse: collapse;"> <tr><td style="width: 50%; height: 20px;"></td><td style="width: 50%;"></td></tr> <tr><td style="height: 20px;"></td><td></td></tr> <tr><td style="height: 20px;"></td><td></td></tr> </table>                                                   |                                                                                     |  |  |  |  |  |  |  |  |
|    |                                                                                                              |                                                                                                                                                                                                                                                                                                                                                                        |                                                                                     |  |  |  |  |  |  |  |  |
|    |                                                                                                              |                                                                                                                                                                                                                                                                                                                                                                        |                                                                                     |  |  |  |  |  |  |  |  |
|    |                                                                                                              |                                                                                                                                                                                                                                                                                                                                                                        |                                                                                     |  |  |  |  |  |  |  |  |
| 10 | Leadership or fiduciary role in other board, society, committee or advocacy group, paid or unpaid            | <input checked="" type="checkbox"/> <b>None</b><br><table border="1" style="width: 100%; border-collapse: collapse;"> <tr><td style="width: 50%; height: 20px;"></td><td style="width: 50%;"></td></tr> <tr><td style="height: 20px;"></td><td></td></tr> <tr><td style="height: 20px;"></td><td></td></tr> </table>                                                   |                                                                                     |  |  |  |  |  |  |  |  |
|    |                                                                                                              |                                                                                                                                                                                                                                                                                                                                                                        |                                                                                     |  |  |  |  |  |  |  |  |
|    |                                                                                                              |                                                                                                                                                                                                                                                                                                                                                                        |                                                                                     |  |  |  |  |  |  |  |  |
|    |                                                                                                              |                                                                                                                                                                                                                                                                                                                                                                        |                                                                                     |  |  |  |  |  |  |  |  |

|           |                                                                                  | Name all entities with whom you have this relationship or indicate none (add rows as needed)                                                                                                                                                                                                             | Specifications/Comments (e.g., if payments were made to you or to your institution) |  |  |  |  |  |  |
|-----------|----------------------------------------------------------------------------------|----------------------------------------------------------------------------------------------------------------------------------------------------------------------------------------------------------------------------------------------------------------------------------------------------------|-------------------------------------------------------------------------------------|--|--|--|--|--|--|
| <b>11</b> | Stock or stock options                                                           | <input checked="" type="checkbox"/> <b>None</b><br><table border="1" style="width: 100%; border-collapse: collapse;"> <tr><td style="height: 20px;"></td><td style="width: 50%;"></td></tr> <tr><td style="height: 20px;"></td><td></td></tr> <tr><td style="height: 20px;"></td><td></td></tr> </table> |                                                                                     |  |  |  |  |  |  |
|           |                                                                                  |                                                                                                                                                                                                                                                                                                          |                                                                                     |  |  |  |  |  |  |
|           |                                                                                  |                                                                                                                                                                                                                                                                                                          |                                                                                     |  |  |  |  |  |  |
|           |                                                                                  |                                                                                                                                                                                                                                                                                                          |                                                                                     |  |  |  |  |  |  |
| <b>12</b> | Receipt of equipment, materials, drugs, medical writing, gifts or other services | <input checked="" type="checkbox"/> <b>None</b><br><table border="1" style="width: 100%; border-collapse: collapse;"> <tr><td style="height: 20px;"></td><td style="width: 50%;"></td></tr> <tr><td style="height: 20px;"></td><td></td></tr> <tr><td style="height: 20px;"></td><td></td></tr> </table> |                                                                                     |  |  |  |  |  |  |
|           |                                                                                  |                                                                                                                                                                                                                                                                                                          |                                                                                     |  |  |  |  |  |  |
|           |                                                                                  |                                                                                                                                                                                                                                                                                                          |                                                                                     |  |  |  |  |  |  |
|           |                                                                                  |                                                                                                                                                                                                                                                                                                          |                                                                                     |  |  |  |  |  |  |
| <b>13</b> | Other financial or non-financial interests                                       | <input checked="" type="checkbox"/> <b>None</b><br><table border="1" style="width: 100%; border-collapse: collapse;"> <tr><td style="height: 20px;"></td><td style="width: 50%;"></td></tr> <tr><td style="height: 20px;"></td><td></td></tr> <tr><td style="height: 20px;"></td><td></td></tr> </table> |                                                                                     |  |  |  |  |  |  |
|           |                                                                                  |                                                                                                                                                                                                                                                                                                          |                                                                                     |  |  |  |  |  |  |
|           |                                                                                  |                                                                                                                                                                                                                                                                                                          |                                                                                     |  |  |  |  |  |  |
|           |                                                                                  |                                                                                                                                                                                                                                                                                                          |                                                                                     |  |  |  |  |  |  |

**Please place an "X" next to the following statement to indicate your agreement:**

I certify that I have answered every question and have not altered the wording of any of the questions on this form.

## ICMJE DISCLOSURE FORM

**Date:** 9/29/2024

**Your Name:** Hua Wu

**Manuscript Title:** 68Ga-MY6349 PET/CT imaging to assess Trop2 expression in multiple types of cancer

**Manuscript Number (if known):** 185408-JCI-CMED-RV-2

In the interest of transparency, we ask you to disclose all relationships/activities/interests listed below that are related to the content of your manuscript. "Related" means any relation with for-profit or not-for-profit third parties whose interests may be affected by the content of the manuscript. Disclosure represents a commitment to transparency and does not necessarily indicate a bias. If you are in doubt about whether to list a relationship/activity/interest, it is preferable that you do so.

The author's relationships/activities/interests should be defined broadly. For example, if your manuscript pertains to the epidemiology of hypertension, you should declare all relationships with manufacturers of antihypertensive medication, even if that medication is not mentioned in the manuscript.

In item #1 below, report all support for the work reported in this manuscript without time limit. For all other items, the time frame for disclosure is the past 36 months.

|                                                    |                                                                                                                                                                                | Name all entities with whom you have this relationship or indicate none (add rows as needed)                                                                                                                                                                                                                                                   | Specifications/Comments (e.g., if payments were made to you or to your institution) |  |  |  |  |  |                                                                                                                                                                                                                                                                                                                                                                                                      |  |  |  |  |  |  |
|----------------------------------------------------|--------------------------------------------------------------------------------------------------------------------------------------------------------------------------------|------------------------------------------------------------------------------------------------------------------------------------------------------------------------------------------------------------------------------------------------------------------------------------------------------------------------------------------------|-------------------------------------------------------------------------------------|--|--|--|--|--|------------------------------------------------------------------------------------------------------------------------------------------------------------------------------------------------------------------------------------------------------------------------------------------------------------------------------------------------------------------------------------------------------|--|--|--|--|--|--|
| Time frame: Since the initial planning of the work |                                                                                                                                                                                |                                                                                                                                                                                                                                                                                                                                                |                                                                                     |  |  |  |  |  |                                                                                                                                                                                                                                                                                                                                                                                                      |  |  |  |  |  |  |
| <b>1</b>                                           | All support for the present manuscript (e.g., funding, provision of study materials, medical writing, article processing charges, etc.)<br><b>No time limit for this item.</b> | <input checked="" type="checkbox"/> <b>None</b><br><table border="1" style="width: 100%; height: 40px; margin-top: 5px;"> <tr><td style="width: 50%;"></td><td style="width: 50%;"></td></tr> <tr><td style="width: 50%;"></td><td style="width: 50%;"></td></tr> <tr><td style="width: 50%;"></td><td style="width: 50%;"></td></tr> </table> |                                                                                     |  |  |  |  |  | <table border="1" style="width: 100%; height: 40px; margin-top: 5px;"> <tr><td style="width: 50%;"></td><td style="width: 50%;"></td></tr> <tr><td style="width: 50%;"></td><td style="width: 50%;"></td></tr> <tr><td style="width: 50%;"></td><td style="width: 50%;"></td></tr> </table> <p style="font-size: small; color: gray; margin-top: 5px;">Click the tab key to add additional rows.</p> |  |  |  |  |  |  |
|                                                    |                                                                                                                                                                                |                                                                                                                                                                                                                                                                                                                                                |                                                                                     |  |  |  |  |  |                                                                                                                                                                                                                                                                                                                                                                                                      |  |  |  |  |  |  |
|                                                    |                                                                                                                                                                                |                                                                                                                                                                                                                                                                                                                                                |                                                                                     |  |  |  |  |  |                                                                                                                                                                                                                                                                                                                                                                                                      |  |  |  |  |  |  |
|                                                    |                                                                                                                                                                                |                                                                                                                                                                                                                                                                                                                                                |                                                                                     |  |  |  |  |  |                                                                                                                                                                                                                                                                                                                                                                                                      |  |  |  |  |  |  |
|                                                    |                                                                                                                                                                                |                                                                                                                                                                                                                                                                                                                                                |                                                                                     |  |  |  |  |  |                                                                                                                                                                                                                                                                                                                                                                                                      |  |  |  |  |  |  |
|                                                    |                                                                                                                                                                                |                                                                                                                                                                                                                                                                                                                                                |                                                                                     |  |  |  |  |  |                                                                                                                                                                                                                                                                                                                                                                                                      |  |  |  |  |  |  |
|                                                    |                                                                                                                                                                                |                                                                                                                                                                                                                                                                                                                                                |                                                                                     |  |  |  |  |  |                                                                                                                                                                                                                                                                                                                                                                                                      |  |  |  |  |  |  |
| Time frame: past 36 months                         |                                                                                                                                                                                |                                                                                                                                                                                                                                                                                                                                                |                                                                                     |  |  |  |  |  |                                                                                                                                                                                                                                                                                                                                                                                                      |  |  |  |  |  |  |
| <b>2</b>                                           | Grants or contracts from any entity (if not indicated in item #1 above).                                                                                                       | <input checked="" type="checkbox"/> <b>None</b><br><table border="1" style="width: 100%; height: 40px; margin-top: 5px;"> <tr><td style="width: 50%;"></td><td style="width: 50%;"></td></tr> <tr><td style="width: 50%;"></td><td style="width: 50%;"></td></tr> <tr><td style="width: 50%;"></td><td style="width: 50%;"></td></tr> </table> |                                                                                     |  |  |  |  |  | <table border="1" style="width: 100%; height: 40px; margin-top: 5px;"> <tr><td style="width: 50%;"></td><td style="width: 50%;"></td></tr> <tr><td style="width: 50%;"></td><td style="width: 50%;"></td></tr> <tr><td style="width: 50%;"></td><td style="width: 50%;"></td></tr> </table>                                                                                                          |  |  |  |  |  |  |
|                                                    |                                                                                                                                                                                |                                                                                                                                                                                                                                                                                                                                                |                                                                                     |  |  |  |  |  |                                                                                                                                                                                                                                                                                                                                                                                                      |  |  |  |  |  |  |
|                                                    |                                                                                                                                                                                |                                                                                                                                                                                                                                                                                                                                                |                                                                                     |  |  |  |  |  |                                                                                                                                                                                                                                                                                                                                                                                                      |  |  |  |  |  |  |
|                                                    |                                                                                                                                                                                |                                                                                                                                                                                                                                                                                                                                                |                                                                                     |  |  |  |  |  |                                                                                                                                                                                                                                                                                                                                                                                                      |  |  |  |  |  |  |
|                                                    |                                                                                                                                                                                |                                                                                                                                                                                                                                                                                                                                                |                                                                                     |  |  |  |  |  |                                                                                                                                                                                                                                                                                                                                                                                                      |  |  |  |  |  |  |
|                                                    |                                                                                                                                                                                |                                                                                                                                                                                                                                                                                                                                                |                                                                                     |  |  |  |  |  |                                                                                                                                                                                                                                                                                                                                                                                                      |  |  |  |  |  |  |
|                                                    |                                                                                                                                                                                |                                                                                                                                                                                                                                                                                                                                                |                                                                                     |  |  |  |  |  |                                                                                                                                                                                                                                                                                                                                                                                                      |  |  |  |  |  |  |
| <b>3</b>                                           | Royalties or licenses                                                                                                                                                          | <input checked="" type="checkbox"/> <b>None</b><br><table border="1" style="width: 100%; height: 40px; margin-top: 5px;"> <tr><td style="width: 50%;"></td><td style="width: 50%;"></td></tr> <tr><td style="width: 50%;"></td><td style="width: 50%;"></td></tr> <tr><td style="width: 50%;"></td><td style="width: 50%;"></td></tr> </table> |                                                                                     |  |  |  |  |  | <table border="1" style="width: 100%; height: 40px; margin-top: 5px;"> <tr><td style="width: 50%;"></td><td style="width: 50%;"></td></tr> <tr><td style="width: 50%;"></td><td style="width: 50%;"></td></tr> <tr><td style="width: 50%;"></td><td style="width: 50%;"></td></tr> </table>                                                                                                          |  |  |  |  |  |  |
|                                                    |                                                                                                                                                                                |                                                                                                                                                                                                                                                                                                                                                |                                                                                     |  |  |  |  |  |                                                                                                                                                                                                                                                                                                                                                                                                      |  |  |  |  |  |  |
|                                                    |                                                                                                                                                                                |                                                                                                                                                                                                                                                                                                                                                |                                                                                     |  |  |  |  |  |                                                                                                                                                                                                                                                                                                                                                                                                      |  |  |  |  |  |  |
|                                                    |                                                                                                                                                                                |                                                                                                                                                                                                                                                                                                                                                |                                                                                     |  |  |  |  |  |                                                                                                                                                                                                                                                                                                                                                                                                      |  |  |  |  |  |  |
|                                                    |                                                                                                                                                                                |                                                                                                                                                                                                                                                                                                                                                |                                                                                     |  |  |  |  |  |                                                                                                                                                                                                                                                                                                                                                                                                      |  |  |  |  |  |  |
|                                                    |                                                                                                                                                                                |                                                                                                                                                                                                                                                                                                                                                |                                                                                     |  |  |  |  |  |                                                                                                                                                                                                                                                                                                                                                                                                      |  |  |  |  |  |  |
|                                                    |                                                                                                                                                                                |                                                                                                                                                                                                                                                                                                                                                |                                                                                     |  |  |  |  |  |                                                                                                                                                                                                                                                                                                                                                                                                      |  |  |  |  |  |  |

|    |                                                                                                              | Name all entities with whom you have this relationship or indicate none (add rows as needed)                                                                                                                                                                                                                                                                                   | Specifications/Comments (e.g., if payments were made to you or to your institution) |  |  |  |  |  |  |
|----|--------------------------------------------------------------------------------------------------------------|--------------------------------------------------------------------------------------------------------------------------------------------------------------------------------------------------------------------------------------------------------------------------------------------------------------------------------------------------------------------------------|-------------------------------------------------------------------------------------|--|--|--|--|--|--|
| 4  | Consulting fees                                                                                              | <input checked="" type="checkbox"/> <b>None</b><br><table border="1" style="width: 100%; border-collapse: collapse;"> <tr><td style="width: 50%; height: 20px;"></td><td style="width: 50%; height: 20px;"></td></tr> <tr><td style="height: 20px;"></td><td style="height: 20px;"></td></tr> <tr><td style="height: 20px;"></td><td style="height: 20px;"></td></tr> </table> |                                                                                     |  |  |  |  |  |  |
|    |                                                                                                              |                                                                                                                                                                                                                                                                                                                                                                                |                                                                                     |  |  |  |  |  |  |
|    |                                                                                                              |                                                                                                                                                                                                                                                                                                                                                                                |                                                                                     |  |  |  |  |  |  |
|    |                                                                                                              |                                                                                                                                                                                                                                                                                                                                                                                |                                                                                     |  |  |  |  |  |  |
| 5  | Payment or honoraria for lectures, presentations, speakers bureaus, manuscript writing or educational events | <input checked="" type="checkbox"/> <b>None</b><br><table border="1" style="width: 100%; border-collapse: collapse;"> <tr><td style="width: 50%; height: 20px;"></td><td style="width: 50%; height: 20px;"></td></tr> <tr><td style="height: 20px;"></td><td style="height: 20px;"></td></tr> </table>                                                                         |                                                                                     |  |  |  |  |  |  |
|    |                                                                                                              |                                                                                                                                                                                                                                                                                                                                                                                |                                                                                     |  |  |  |  |  |  |
|    |                                                                                                              |                                                                                                                                                                                                                                                                                                                                                                                |                                                                                     |  |  |  |  |  |  |
| 6  | Payment for expert testimony                                                                                 | <input checked="" type="checkbox"/> <b>None</b><br><table border="1" style="width: 100%; border-collapse: collapse;"> <tr><td style="width: 50%; height: 20px;"></td><td style="width: 50%; height: 20px;"></td></tr> <tr><td style="height: 20px;"></td><td style="height: 20px;"></td></tr> </table>                                                                         |                                                                                     |  |  |  |  |  |  |
|    |                                                                                                              |                                                                                                                                                                                                                                                                                                                                                                                |                                                                                     |  |  |  |  |  |  |
|    |                                                                                                              |                                                                                                                                                                                                                                                                                                                                                                                |                                                                                     |  |  |  |  |  |  |
| 7  | Support for attending meetings and/or travel                                                                 | <input checked="" type="checkbox"/> <b>None</b><br><table border="1" style="width: 100%; border-collapse: collapse;"> <tr><td style="width: 50%; height: 20px;"></td><td style="width: 50%; height: 20px;"></td></tr> <tr><td style="height: 20px;"></td><td style="height: 20px;"></td></tr> </table>                                                                         |                                                                                     |  |  |  |  |  |  |
|    |                                                                                                              |                                                                                                                                                                                                                                                                                                                                                                                |                                                                                     |  |  |  |  |  |  |
|    |                                                                                                              |                                                                                                                                                                                                                                                                                                                                                                                |                                                                                     |  |  |  |  |  |  |
| 8  | Patents planned, issued or pending                                                                           | <input checked="" type="checkbox"/> <b>None</b><br><table border="1" style="width: 100%; border-collapse: collapse;"> <tr><td style="width: 50%; height: 20px;"></td><td style="width: 50%; height: 20px;"></td></tr> <tr><td style="height: 20px;"></td><td style="height: 20px;"></td></tr> </table>                                                                         |                                                                                     |  |  |  |  |  |  |
|    |                                                                                                              |                                                                                                                                                                                                                                                                                                                                                                                |                                                                                     |  |  |  |  |  |  |
|    |                                                                                                              |                                                                                                                                                                                                                                                                                                                                                                                |                                                                                     |  |  |  |  |  |  |
| 9  | Participation on a Data Safety Monitoring Board or Advisory Board                                            | <input checked="" type="checkbox"/> <b>None</b><br><table border="1" style="width: 100%; border-collapse: collapse;"> <tr><td style="width: 50%; height: 20px;"></td><td style="width: 50%; height: 20px;"></td></tr> <tr><td style="height: 20px;"></td><td style="height: 20px;"></td></tr> </table>                                                                         |                                                                                     |  |  |  |  |  |  |
|    |                                                                                                              |                                                                                                                                                                                                                                                                                                                                                                                |                                                                                     |  |  |  |  |  |  |
|    |                                                                                                              |                                                                                                                                                                                                                                                                                                                                                                                |                                                                                     |  |  |  |  |  |  |
| 10 | Leadership or fiduciary role in other board, society, committee or advocacy group, paid or unpaid            | <input checked="" type="checkbox"/> <b>None</b><br><table border="1" style="width: 100%; border-collapse: collapse;"> <tr><td style="width: 50%; height: 20px;"></td><td style="width: 50%; height: 20px;"></td></tr> <tr><td style="height: 20px;"></td><td style="height: 20px;"></td></tr> </table>                                                                         |                                                                                     |  |  |  |  |  |  |
|    |                                                                                                              |                                                                                                                                                                                                                                                                                                                                                                                |                                                                                     |  |  |  |  |  |  |
|    |                                                                                                              |                                                                                                                                                                                                                                                                                                                                                                                |                                                                                     |  |  |  |  |  |  |

|           |                                                                                  | Name all entities with whom you have this relationship or indicate none (add rows as needed)                                                                                                                                                                                                                         | Specifications/Comments (e.g., if payments were made to you or to your institution) |  |  |  |  |  |  |
|-----------|----------------------------------------------------------------------------------|----------------------------------------------------------------------------------------------------------------------------------------------------------------------------------------------------------------------------------------------------------------------------------------------------------------------|-------------------------------------------------------------------------------------|--|--|--|--|--|--|
| <b>11</b> | Stock or stock options                                                           | <input checked="" type="checkbox"/> <b>None</b><br><table border="1" style="width: 100%; border-collapse: collapse;"> <tr><td style="width: 50%; height: 20px;"></td><td style="width: 50%;"></td></tr> <tr><td style="height: 20px;"></td><td></td></tr> <tr><td style="height: 20px;"></td><td></td></tr> </table> |                                                                                     |  |  |  |  |  |  |
|           |                                                                                  |                                                                                                                                                                                                                                                                                                                      |                                                                                     |  |  |  |  |  |  |
|           |                                                                                  |                                                                                                                                                                                                                                                                                                                      |                                                                                     |  |  |  |  |  |  |
|           |                                                                                  |                                                                                                                                                                                                                                                                                                                      |                                                                                     |  |  |  |  |  |  |
| <b>12</b> | Receipt of equipment, materials, drugs, medical writing, gifts or other services | <input checked="" type="checkbox"/> <b>None</b><br><table border="1" style="width: 100%; border-collapse: collapse;"> <tr><td style="width: 50%; height: 20px;"></td><td style="width: 50%;"></td></tr> <tr><td style="height: 20px;"></td><td></td></tr> <tr><td style="height: 20px;"></td><td></td></tr> </table> |                                                                                     |  |  |  |  |  |  |
|           |                                                                                  |                                                                                                                                                                                                                                                                                                                      |                                                                                     |  |  |  |  |  |  |
|           |                                                                                  |                                                                                                                                                                                                                                                                                                                      |                                                                                     |  |  |  |  |  |  |
|           |                                                                                  |                                                                                                                                                                                                                                                                                                                      |                                                                                     |  |  |  |  |  |  |
| <b>13</b> | Other financial or non-financial interests                                       | <input checked="" type="checkbox"/> <b>None</b><br><table border="1" style="width: 100%; border-collapse: collapse;"> <tr><td style="width: 50%; height: 20px;"></td><td style="width: 50%;"></td></tr> <tr><td style="height: 20px;"></td><td></td></tr> <tr><td style="height: 20px;"></td><td></td></tr> </table> |                                                                                     |  |  |  |  |  |  |
|           |                                                                                  |                                                                                                                                                                                                                                                                                                                      |                                                                                     |  |  |  |  |  |  |
|           |                                                                                  |                                                                                                                                                                                                                                                                                                                      |                                                                                     |  |  |  |  |  |  |
|           |                                                                                  |                                                                                                                                                                                                                                                                                                                      |                                                                                     |  |  |  |  |  |  |

**Please place an "X" next to the following statement to indicate your agreement:**

I certify that I have answered every question and have not altered the wording of any of the questions on this form.

## ICMJE DISCLOSURE FORM

**Date:** 9/29/2024

**Your Name:** Zhanxiang Wang

**Manuscript Title:** 68Ga-MY6349 PET/CT imaging to assess Trop2 expression in multiple types of cancer

**Manuscript Number (if known):** 185408-JCI-CMED-RV-2

In the interest of transparency, we ask you to disclose all relationships/activities/interests listed below that are related to the content of your manuscript. "Related" means any relation with for-profit or not-for-profit third parties whose interests may be affected by the content of the manuscript. Disclosure represents a commitment to transparency and does not necessarily indicate a bias. If you are in doubt about whether to list a relationship/activity/interest, it is preferable that you do so.

The author's relationships/activities/interests should be defined broadly. For example, if your manuscript pertains to the epidemiology of hypertension, you should declare all relationships with manufacturers of antihypertensive medication, even if that medication is not mentioned in the manuscript.

In item #1 below, report all support for the work reported in this manuscript without time limit. For all other items, the time frame for disclosure is the past 36 months.

|                                                    |                                                                                                                                                                                | Name all entities with whom you have this relationship or indicate none (add rows as needed)                                                                                                                                                                                                                                                   | Specifications/Comments (e.g., if payments were made to you or to your institution) |  |  |  |  |  |                                                                                                                |
|----------------------------------------------------|--------------------------------------------------------------------------------------------------------------------------------------------------------------------------------|------------------------------------------------------------------------------------------------------------------------------------------------------------------------------------------------------------------------------------------------------------------------------------------------------------------------------------------------|-------------------------------------------------------------------------------------|--|--|--|--|--|----------------------------------------------------------------------------------------------------------------|
| Time frame: Since the initial planning of the work |                                                                                                                                                                                |                                                                                                                                                                                                                                                                                                                                                |                                                                                     |  |  |  |  |  |                                                                                                                |
| <b>1</b>                                           | All support for the present manuscript (e.g., funding, provision of study materials, medical writing, article processing charges, etc.)<br><b>No time limit for this item.</b> | <input checked="" type="checkbox"/> <b>None</b><br><table border="1" style="width: 100%; height: 40px; margin-top: 5px;"> <tr><td style="width: 50%;"></td><td style="width: 50%;"></td></tr> <tr><td style="width: 50%;"></td><td style="width: 50%;"></td></tr> <tr><td style="width: 50%;"></td><td style="width: 50%;"></td></tr> </table> |                                                                                     |  |  |  |  |  | <div style="text-align: right; font-size: small; color: #ccc;">Click the tab key to add additional rows.</div> |
|                                                    |                                                                                                                                                                                |                                                                                                                                                                                                                                                                                                                                                |                                                                                     |  |  |  |  |  |                                                                                                                |
|                                                    |                                                                                                                                                                                |                                                                                                                                                                                                                                                                                                                                                |                                                                                     |  |  |  |  |  |                                                                                                                |
|                                                    |                                                                                                                                                                                |                                                                                                                                                                                                                                                                                                                                                |                                                                                     |  |  |  |  |  |                                                                                                                |
| Time frame: past 36 months                         |                                                                                                                                                                                |                                                                                                                                                                                                                                                                                                                                                |                                                                                     |  |  |  |  |  |                                                                                                                |
| <b>2</b>                                           | Grants or contracts from any entity (if not indicated in item #1 above).                                                                                                       | <input checked="" type="checkbox"/> <b>None</b><br><table border="1" style="width: 100%; height: 40px; margin-top: 5px;"> <tr><td style="width: 50%;"></td><td style="width: 50%;"></td></tr> <tr><td style="width: 50%;"></td><td style="width: 50%;"></td></tr> <tr><td style="width: 50%;"></td><td style="width: 50%;"></td></tr> </table> |                                                                                     |  |  |  |  |  |                                                                                                                |
|                                                    |                                                                                                                                                                                |                                                                                                                                                                                                                                                                                                                                                |                                                                                     |  |  |  |  |  |                                                                                                                |
|                                                    |                                                                                                                                                                                |                                                                                                                                                                                                                                                                                                                                                |                                                                                     |  |  |  |  |  |                                                                                                                |
|                                                    |                                                                                                                                                                                |                                                                                                                                                                                                                                                                                                                                                |                                                                                     |  |  |  |  |  |                                                                                                                |
| <b>3</b>                                           | Royalties or licenses                                                                                                                                                          | <input checked="" type="checkbox"/> <b>None</b><br><table border="1" style="width: 100%; height: 40px; margin-top: 5px;"> <tr><td style="width: 50%;"></td><td style="width: 50%;"></td></tr> <tr><td style="width: 50%;"></td><td style="width: 50%;"></td></tr> <tr><td style="width: 50%;"></td><td style="width: 50%;"></td></tr> </table> |                                                                                     |  |  |  |  |  |                                                                                                                |
|                                                    |                                                                                                                                                                                |                                                                                                                                                                                                                                                                                                                                                |                                                                                     |  |  |  |  |  |                                                                                                                |
|                                                    |                                                                                                                                                                                |                                                                                                                                                                                                                                                                                                                                                |                                                                                     |  |  |  |  |  |                                                                                                                |
|                                                    |                                                                                                                                                                                |                                                                                                                                                                                                                                                                                                                                                |                                                                                     |  |  |  |  |  |                                                                                                                |

|    |                                                                                                              | Name all entities with whom you have this relationship or indicate none (add rows as needed)                                                                                                                                                                                                                                                                                   | Specifications/Comments (e.g., if payments were made to you or to your institution) |  |  |  |  |  |  |
|----|--------------------------------------------------------------------------------------------------------------|--------------------------------------------------------------------------------------------------------------------------------------------------------------------------------------------------------------------------------------------------------------------------------------------------------------------------------------------------------------------------------|-------------------------------------------------------------------------------------|--|--|--|--|--|--|
| 4  | Consulting fees                                                                                              | <input checked="" type="checkbox"/> <b>None</b><br><table border="1" style="width: 100%; border-collapse: collapse;"> <tr><td style="width: 50%; height: 20px;"></td><td style="width: 50%; height: 20px;"></td></tr> <tr><td style="height: 20px;"></td><td style="height: 20px;"></td></tr> <tr><td style="height: 20px;"></td><td style="height: 20px;"></td></tr> </table> |                                                                                     |  |  |  |  |  |  |
|    |                                                                                                              |                                                                                                                                                                                                                                                                                                                                                                                |                                                                                     |  |  |  |  |  |  |
|    |                                                                                                              |                                                                                                                                                                                                                                                                                                                                                                                |                                                                                     |  |  |  |  |  |  |
|    |                                                                                                              |                                                                                                                                                                                                                                                                                                                                                                                |                                                                                     |  |  |  |  |  |  |
| 5  | Payment or honoraria for lectures, presentations, speakers bureaus, manuscript writing or educational events | <input checked="" type="checkbox"/> <b>None</b><br><table border="1" style="width: 100%; border-collapse: collapse;"> <tr><td style="width: 50%; height: 20px;"></td><td style="width: 50%; height: 20px;"></td></tr> <tr><td style="height: 20px;"></td><td style="height: 20px;"></td></tr> </table>                                                                         |                                                                                     |  |  |  |  |  |  |
|    |                                                                                                              |                                                                                                                                                                                                                                                                                                                                                                                |                                                                                     |  |  |  |  |  |  |
|    |                                                                                                              |                                                                                                                                                                                                                                                                                                                                                                                |                                                                                     |  |  |  |  |  |  |
| 6  | Payment for expert testimony                                                                                 | <input checked="" type="checkbox"/> <b>None</b><br><table border="1" style="width: 100%; border-collapse: collapse;"> <tr><td style="width: 50%; height: 20px;"></td><td style="width: 50%; height: 20px;"></td></tr> <tr><td style="height: 20px;"></td><td style="height: 20px;"></td></tr> </table>                                                                         |                                                                                     |  |  |  |  |  |  |
|    |                                                                                                              |                                                                                                                                                                                                                                                                                                                                                                                |                                                                                     |  |  |  |  |  |  |
|    |                                                                                                              |                                                                                                                                                                                                                                                                                                                                                                                |                                                                                     |  |  |  |  |  |  |
| 7  | Support for attending meetings and/or travel                                                                 | <input checked="" type="checkbox"/> <b>None</b><br><table border="1" style="width: 100%; border-collapse: collapse;"> <tr><td style="width: 50%; height: 20px;"></td><td style="width: 50%; height: 20px;"></td></tr> <tr><td style="height: 20px;"></td><td style="height: 20px;"></td></tr> </table>                                                                         |                                                                                     |  |  |  |  |  |  |
|    |                                                                                                              |                                                                                                                                                                                                                                                                                                                                                                                |                                                                                     |  |  |  |  |  |  |
|    |                                                                                                              |                                                                                                                                                                                                                                                                                                                                                                                |                                                                                     |  |  |  |  |  |  |
| 8  | Patents planned, issued or pending                                                                           | <input checked="" type="checkbox"/> <b>None</b><br><table border="1" style="width: 100%; border-collapse: collapse;"> <tr><td style="width: 50%; height: 20px;"></td><td style="width: 50%; height: 20px;"></td></tr> <tr><td style="height: 20px;"></td><td style="height: 20px;"></td></tr> </table>                                                                         |                                                                                     |  |  |  |  |  |  |
|    |                                                                                                              |                                                                                                                                                                                                                                                                                                                                                                                |                                                                                     |  |  |  |  |  |  |
|    |                                                                                                              |                                                                                                                                                                                                                                                                                                                                                                                |                                                                                     |  |  |  |  |  |  |
| 9  | Participation on a Data Safety Monitoring Board or Advisory Board                                            | <input checked="" type="checkbox"/> <b>None</b><br><table border="1" style="width: 100%; border-collapse: collapse;"> <tr><td style="width: 50%; height: 20px;"></td><td style="width: 50%; height: 20px;"></td></tr> <tr><td style="height: 20px;"></td><td style="height: 20px;"></td></tr> </table>                                                                         |                                                                                     |  |  |  |  |  |  |
|    |                                                                                                              |                                                                                                                                                                                                                                                                                                                                                                                |                                                                                     |  |  |  |  |  |  |
|    |                                                                                                              |                                                                                                                                                                                                                                                                                                                                                                                |                                                                                     |  |  |  |  |  |  |
| 10 | Leadership or fiduciary role in other board, society, committee or advocacy group, paid or unpaid            | <input checked="" type="checkbox"/> <b>None</b><br><table border="1" style="width: 100%; border-collapse: collapse;"> <tr><td style="width: 50%; height: 20px;"></td><td style="width: 50%; height: 20px;"></td></tr> <tr><td style="height: 20px;"></td><td style="height: 20px;"></td></tr> </table>                                                                         |                                                                                     |  |  |  |  |  |  |
|    |                                                                                                              |                                                                                                                                                                                                                                                                                                                                                                                |                                                                                     |  |  |  |  |  |  |
|    |                                                                                                              |                                                                                                                                                                                                                                                                                                                                                                                |                                                                                     |  |  |  |  |  |  |

|           |                                                                                  | Name all entities with whom you have this relationship or indicate none (add rows as needed)                                                                                                                                                                                                             | Specifications/Comments (e.g., if payments were made to you or to your institution) |  |  |  |  |  |  |
|-----------|----------------------------------------------------------------------------------|----------------------------------------------------------------------------------------------------------------------------------------------------------------------------------------------------------------------------------------------------------------------------------------------------------|-------------------------------------------------------------------------------------|--|--|--|--|--|--|
| <b>11</b> | Stock or stock options                                                           | <input checked="" type="checkbox"/> <b>None</b><br><table border="1" style="width: 100%; border-collapse: collapse;"> <tr><td style="height: 20px;"></td><td style="width: 50%;"></td></tr> <tr><td style="height: 20px;"></td><td></td></tr> <tr><td style="height: 20px;"></td><td></td></tr> </table> |                                                                                     |  |  |  |  |  |  |
|           |                                                                                  |                                                                                                                                                                                                                                                                                                          |                                                                                     |  |  |  |  |  |  |
|           |                                                                                  |                                                                                                                                                                                                                                                                                                          |                                                                                     |  |  |  |  |  |  |
|           |                                                                                  |                                                                                                                                                                                                                                                                                                          |                                                                                     |  |  |  |  |  |  |
| <b>12</b> | Receipt of equipment, materials, drugs, medical writing, gifts or other services | <input checked="" type="checkbox"/> <b>None</b><br><table border="1" style="width: 100%; border-collapse: collapse;"> <tr><td style="height: 20px;"></td><td style="width: 50%;"></td></tr> <tr><td style="height: 20px;"></td><td></td></tr> <tr><td style="height: 20px;"></td><td></td></tr> </table> |                                                                                     |  |  |  |  |  |  |
|           |                                                                                  |                                                                                                                                                                                                                                                                                                          |                                                                                     |  |  |  |  |  |  |
|           |                                                                                  |                                                                                                                                                                                                                                                                                                          |                                                                                     |  |  |  |  |  |  |
|           |                                                                                  |                                                                                                                                                                                                                                                                                                          |                                                                                     |  |  |  |  |  |  |
| <b>13</b> | Other financial or non-financial interests                                       | <input checked="" type="checkbox"/> <b>None</b><br><table border="1" style="width: 100%; border-collapse: collapse;"> <tr><td style="height: 20px;"></td><td style="width: 50%;"></td></tr> <tr><td style="height: 20px;"></td><td></td></tr> <tr><td style="height: 20px;"></td><td></td></tr> </table> |                                                                                     |  |  |  |  |  |  |
|           |                                                                                  |                                                                                                                                                                                                                                                                                                          |                                                                                     |  |  |  |  |  |  |
|           |                                                                                  |                                                                                                                                                                                                                                                                                                          |                                                                                     |  |  |  |  |  |  |
|           |                                                                                  |                                                                                                                                                                                                                                                                                                          |                                                                                     |  |  |  |  |  |  |

**Please place an "X" next to the following statement to indicate your agreement:**

I certify that I have answered every question and have not altered the wording of any of the questions on this form.

## ICMJE DISCLOSURE FORM

**Date:** 9/29/2024

**Your Name:** Fan Wang

**Manuscript Title:** 68Ga-MY6349 PET/CT imaging to assess Trop2 expression in multiple types of cancer

**Manuscript Number (if known):** 185408-JCI-CMED-RV-2

In the interest of transparency, we ask you to disclose all relationships/activities/interests listed below that are related to the content of your manuscript. "Related" means any relation with for-profit or not-for-profit third parties whose interests may be affected by the content of the manuscript. Disclosure represents a commitment to transparency and does not necessarily indicate a bias. If you are in doubt about whether to list a relationship/activity/interest, it is preferable that you do so.

The author's relationships/activities/interests should be defined broadly. For example, if your manuscript pertains to the epidemiology of hypertension, you should declare all relationships with manufacturers of antihypertensive medication, even if that medication is not mentioned in the manuscript.

In item #1 below, report all support for the work reported in this manuscript without time limit. For all other items, the time frame for disclosure is the past 36 months.

|                                                                                                                      |                                                                                                                                                                                | Name all entities with whom you have this relationship or indicate none (add rows as needed) | Specifications/Comments (e.g., if payments were made to you or to your institution)                                                                                                                                                                                                                                                                                                                                                                                                                                                                                              |                                                                                                                      |                                                                              |                                                                       |  |                                           |  |
|----------------------------------------------------------------------------------------------------------------------|--------------------------------------------------------------------------------------------------------------------------------------------------------------------------------|----------------------------------------------------------------------------------------------|----------------------------------------------------------------------------------------------------------------------------------------------------------------------------------------------------------------------------------------------------------------------------------------------------------------------------------------------------------------------------------------------------------------------------------------------------------------------------------------------------------------------------------------------------------------------------------|----------------------------------------------------------------------------------------------------------------------|------------------------------------------------------------------------------|-----------------------------------------------------------------------|--|-------------------------------------------|--|
| Time frame: Since the initial planning of the work                                                                   |                                                                                                                                                                                |                                                                                              |                                                                                                                                                                                                                                                                                                                                                                                                                                                                                                                                                                                  |                                                                                                                      |                                                                              |                                                                       |  |                                           |  |
| <b>1</b>                                                                                                             | All support for the present manuscript (e.g., funding, provision of study materials, medical writing, article processing charges, etc.)<br><b>No time limit for this item.</b> | <input type="checkbox"/> <b>None</b>                                                         | <table border="1" style="width: 100%; border-collapse: collapse;"> <tr> <td style="width: 50%;">Funding: The National Natural Science Foundation of China (NSFC) projects (grant numbers <b>92159201, 81927802</b>)</td> <td style="width: 50%;">Funding: The National Key R&amp;D Program of China (grant number 2022YFA1206100)</td> </tr> <tr> <td>Funding: The Nuclear Energy R&amp;D project [grant number HNKF202223(36)]</td> <td></td> </tr> <tr> <td colspan="2" style="text-align: center; color: #ccc;">Click the tab key to add additional rows.</td> </tr> </table> | Funding: The National Natural Science Foundation of China (NSFC) projects (grant numbers <b>92159201, 81927802</b> ) | Funding: The National Key R&D Program of China (grant number 2022YFA1206100) | Funding: The Nuclear Energy R&D project [grant number HNKF202223(36)] |  | Click the tab key to add additional rows. |  |
| Funding: The National Natural Science Foundation of China (NSFC) projects (grant numbers <b>92159201, 81927802</b> ) | Funding: The National Key R&D Program of China (grant number 2022YFA1206100)                                                                                                   |                                                                                              |                                                                                                                                                                                                                                                                                                                                                                                                                                                                                                                                                                                  |                                                                                                                      |                                                                              |                                                                       |  |                                           |  |
| Funding: The Nuclear Energy R&D project [grant number HNKF202223(36)]                                                |                                                                                                                                                                                |                                                                                              |                                                                                                                                                                                                                                                                                                                                                                                                                                                                                                                                                                                  |                                                                                                                      |                                                                              |                                                                       |  |                                           |  |
| Click the tab key to add additional rows.                                                                            |                                                                                                                                                                                |                                                                                              |                                                                                                                                                                                                                                                                                                                                                                                                                                                                                                                                                                                  |                                                                                                                      |                                                                              |                                                                       |  |                                           |  |
| Time frame: past 36 months                                                                                           |                                                                                                                                                                                |                                                                                              |                                                                                                                                                                                                                                                                                                                                                                                                                                                                                                                                                                                  |                                                                                                                      |                                                                              |                                                                       |  |                                           |  |
| <b>2</b>                                                                                                             | Grants or contracts from any entity (if not indicated in item #1 above).                                                                                                       | <input checked="" type="checkbox"/> <b>None</b>                                              | <table border="1" style="width: 100%; border-collapse: collapse; height: 40px;"> <tr><td style="width: 50%;"></td><td style="width: 50%;"></td></tr> <tr><td style="width: 50%;"></td><td style="width: 50%;"></td></tr> <tr><td style="width: 50%;"></td><td style="width: 50%;"></td></tr> </table>                                                                                                                                                                                                                                                                            |                                                                                                                      |                                                                              |                                                                       |  |                                           |  |
|                                                                                                                      |                                                                                                                                                                                |                                                                                              |                                                                                                                                                                                                                                                                                                                                                                                                                                                                                                                                                                                  |                                                                                                                      |                                                                              |                                                                       |  |                                           |  |
|                                                                                                                      |                                                                                                                                                                                |                                                                                              |                                                                                                                                                                                                                                                                                                                                                                                                                                                                                                                                                                                  |                                                                                                                      |                                                                              |                                                                       |  |                                           |  |
|                                                                                                                      |                                                                                                                                                                                |                                                                                              |                                                                                                                                                                                                                                                                                                                                                                                                                                                                                                                                                                                  |                                                                                                                      |                                                                              |                                                                       |  |                                           |  |
| <b>3</b>                                                                                                             | Royalties or licenses                                                                                                                                                          | <input checked="" type="checkbox"/> <b>None</b>                                              | <table border="1" style="width: 100%; border-collapse: collapse; height: 40px;"> <tr><td style="width: 50%;"></td><td style="width: 50%;"></td></tr> <tr><td style="width: 50%;"></td><td style="width: 50%;"></td></tr> <tr><td style="width: 50%;"></td><td style="width: 50%;"></td></tr> </table>                                                                                                                                                                                                                                                                            |                                                                                                                      |                                                                              |                                                                       |  |                                           |  |
|                                                                                                                      |                                                                                                                                                                                |                                                                                              |                                                                                                                                                                                                                                                                                                                                                                                                                                                                                                                                                                                  |                                                                                                                      |                                                                              |                                                                       |  |                                           |  |
|                                                                                                                      |                                                                                                                                                                                |                                                                                              |                                                                                                                                                                                                                                                                                                                                                                                                                                                                                                                                                                                  |                                                                                                                      |                                                                              |                                                                       |  |                                           |  |
|                                                                                                                      |                                                                                                                                                                                |                                                                                              |                                                                                                                                                                                                                                                                                                                                                                                                                                                                                                                                                                                  |                                                                                                                      |                                                                              |                                                                       |  |                                           |  |

|    |                                                                                                              | Name all entities with whom you have this relationship or indicate none (add rows as needed)                                                                                                                                                                                                                                                                           | Specifications/Comments (e.g., if payments were made to you or to your institution) |  |  |  |  |  |  |  |  |
|----|--------------------------------------------------------------------------------------------------------------|------------------------------------------------------------------------------------------------------------------------------------------------------------------------------------------------------------------------------------------------------------------------------------------------------------------------------------------------------------------------|-------------------------------------------------------------------------------------|--|--|--|--|--|--|--|--|
| 4  | Consulting fees                                                                                              | <input checked="" type="checkbox"/> <b>None</b><br><table border="1" style="width: 100%; border-collapse: collapse;"> <tr><td style="width: 50%; height: 20px;"></td><td style="width: 50%;"></td></tr> <tr><td style="height: 20px;"></td><td></td></tr> <tr><td style="height: 20px;"></td><td></td></tr> <tr><td style="height: 20px;"></td><td></td></tr> </table> |                                                                                     |  |  |  |  |  |  |  |  |
|    |                                                                                                              |                                                                                                                                                                                                                                                                                                                                                                        |                                                                                     |  |  |  |  |  |  |  |  |
|    |                                                                                                              |                                                                                                                                                                                                                                                                                                                                                                        |                                                                                     |  |  |  |  |  |  |  |  |
|    |                                                                                                              |                                                                                                                                                                                                                                                                                                                                                                        |                                                                                     |  |  |  |  |  |  |  |  |
|    |                                                                                                              |                                                                                                                                                                                                                                                                                                                                                                        |                                                                                     |  |  |  |  |  |  |  |  |
| 5  | Payment or honoraria for lectures, presentations, speakers bureaus, manuscript writing or educational events | <input checked="" type="checkbox"/> <b>None</b><br><table border="1" style="width: 100%; border-collapse: collapse;"> <tr><td style="width: 50%; height: 20px;"></td><td style="width: 50%;"></td></tr> <tr><td style="height: 20px;"></td><td></td></tr> <tr><td style="height: 20px;"></td><td></td></tr> </table>                                                   |                                                                                     |  |  |  |  |  |  |  |  |
|    |                                                                                                              |                                                                                                                                                                                                                                                                                                                                                                        |                                                                                     |  |  |  |  |  |  |  |  |
|    |                                                                                                              |                                                                                                                                                                                                                                                                                                                                                                        |                                                                                     |  |  |  |  |  |  |  |  |
|    |                                                                                                              |                                                                                                                                                                                                                                                                                                                                                                        |                                                                                     |  |  |  |  |  |  |  |  |
| 6  | Payment for expert testimony                                                                                 | <input checked="" type="checkbox"/> <b>None</b><br><table border="1" style="width: 100%; border-collapse: collapse;"> <tr><td style="width: 50%; height: 20px;"></td><td style="width: 50%;"></td></tr> <tr><td style="height: 20px;"></td><td></td></tr> <tr><td style="height: 20px;"></td><td></td></tr> </table>                                                   |                                                                                     |  |  |  |  |  |  |  |  |
|    |                                                                                                              |                                                                                                                                                                                                                                                                                                                                                                        |                                                                                     |  |  |  |  |  |  |  |  |
|    |                                                                                                              |                                                                                                                                                                                                                                                                                                                                                                        |                                                                                     |  |  |  |  |  |  |  |  |
|    |                                                                                                              |                                                                                                                                                                                                                                                                                                                                                                        |                                                                                     |  |  |  |  |  |  |  |  |
| 7  | Support for attending meetings and/or travel                                                                 | <input checked="" type="checkbox"/> <b>None</b><br><table border="1" style="width: 100%; border-collapse: collapse;"> <tr><td style="width: 50%; height: 20px;"></td><td style="width: 50%;"></td></tr> <tr><td style="height: 20px;"></td><td></td></tr> <tr><td style="height: 20px;"></td><td></td></tr> </table>                                                   |                                                                                     |  |  |  |  |  |  |  |  |
|    |                                                                                                              |                                                                                                                                                                                                                                                                                                                                                                        |                                                                                     |  |  |  |  |  |  |  |  |
|    |                                                                                                              |                                                                                                                                                                                                                                                                                                                                                                        |                                                                                     |  |  |  |  |  |  |  |  |
|    |                                                                                                              |                                                                                                                                                                                                                                                                                                                                                                        |                                                                                     |  |  |  |  |  |  |  |  |
| 8  | Patents planned, issued or pending                                                                           | <input checked="" type="checkbox"/> <b>None</b><br><table border="1" style="width: 100%; border-collapse: collapse;"> <tr><td style="width: 50%; height: 20px;"></td><td style="width: 50%;"></td></tr> <tr><td style="height: 20px;"></td><td></td></tr> <tr><td style="height: 20px;"></td><td></td></tr> </table>                                                   |                                                                                     |  |  |  |  |  |  |  |  |
|    |                                                                                                              |                                                                                                                                                                                                                                                                                                                                                                        |                                                                                     |  |  |  |  |  |  |  |  |
|    |                                                                                                              |                                                                                                                                                                                                                                                                                                                                                                        |                                                                                     |  |  |  |  |  |  |  |  |
|    |                                                                                                              |                                                                                                                                                                                                                                                                                                                                                                        |                                                                                     |  |  |  |  |  |  |  |  |
| 9  | Participation on a Data Safety Monitoring Board or Advisory Board                                            | <input checked="" type="checkbox"/> <b>None</b><br><table border="1" style="width: 100%; border-collapse: collapse;"> <tr><td style="width: 50%; height: 20px;"></td><td style="width: 50%;"></td></tr> <tr><td style="height: 20px;"></td><td></td></tr> <tr><td style="height: 20px;"></td><td></td></tr> </table>                                                   |                                                                                     |  |  |  |  |  |  |  |  |
|    |                                                                                                              |                                                                                                                                                                                                                                                                                                                                                                        |                                                                                     |  |  |  |  |  |  |  |  |
|    |                                                                                                              |                                                                                                                                                                                                                                                                                                                                                                        |                                                                                     |  |  |  |  |  |  |  |  |
|    |                                                                                                              |                                                                                                                                                                                                                                                                                                                                                                        |                                                                                     |  |  |  |  |  |  |  |  |
| 10 | Leadership or fiduciary role in other board, society, committee or advocacy group, paid or unpaid            | <input checked="" type="checkbox"/> <b>None</b><br><table border="1" style="width: 100%; border-collapse: collapse;"> <tr><td style="width: 50%; height: 20px;"></td><td style="width: 50%;"></td></tr> <tr><td style="height: 20px;"></td><td></td></tr> <tr><td style="height: 20px;"></td><td></td></tr> </table>                                                   |                                                                                     |  |  |  |  |  |  |  |  |
|    |                                                                                                              |                                                                                                                                                                                                                                                                                                                                                                        |                                                                                     |  |  |  |  |  |  |  |  |
|    |                                                                                                              |                                                                                                                                                                                                                                                                                                                                                                        |                                                                                     |  |  |  |  |  |  |  |  |
|    |                                                                                                              |                                                                                                                                                                                                                                                                                                                                                                        |                                                                                     |  |  |  |  |  |  |  |  |

|           |                                                                                  | Name all entities with whom you have this relationship or indicate none (add rows as needed)                                                                                                                                                                                                             | Specifications/Comments (e.g., if payments were made to you or to your institution) |  |  |  |  |  |  |
|-----------|----------------------------------------------------------------------------------|----------------------------------------------------------------------------------------------------------------------------------------------------------------------------------------------------------------------------------------------------------------------------------------------------------|-------------------------------------------------------------------------------------|--|--|--|--|--|--|
| <b>11</b> | Stock or stock options                                                           | <input checked="" type="checkbox"/> <b>None</b><br><table border="1" style="width: 100%; border-collapse: collapse;"> <tr><td style="height: 20px;"></td><td style="width: 50%;"></td></tr> <tr><td style="height: 20px;"></td><td></td></tr> <tr><td style="height: 20px;"></td><td></td></tr> </table> |                                                                                     |  |  |  |  |  |  |
|           |                                                                                  |                                                                                                                                                                                                                                                                                                          |                                                                                     |  |  |  |  |  |  |
|           |                                                                                  |                                                                                                                                                                                                                                                                                                          |                                                                                     |  |  |  |  |  |  |
|           |                                                                                  |                                                                                                                                                                                                                                                                                                          |                                                                                     |  |  |  |  |  |  |
| <b>12</b> | Receipt of equipment, materials, drugs, medical writing, gifts or other services | <input checked="" type="checkbox"/> <b>None</b><br><table border="1" style="width: 100%; border-collapse: collapse;"> <tr><td style="height: 20px;"></td><td style="width: 50%;"></td></tr> <tr><td style="height: 20px;"></td><td></td></tr> <tr><td style="height: 20px;"></td><td></td></tr> </table> |                                                                                     |  |  |  |  |  |  |
|           |                                                                                  |                                                                                                                                                                                                                                                                                                          |                                                                                     |  |  |  |  |  |  |
|           |                                                                                  |                                                                                                                                                                                                                                                                                                          |                                                                                     |  |  |  |  |  |  |
|           |                                                                                  |                                                                                                                                                                                                                                                                                                          |                                                                                     |  |  |  |  |  |  |
| <b>13</b> | Other financial or non-financial interests                                       | <input checked="" type="checkbox"/> <b>None</b><br><table border="1" style="width: 100%; border-collapse: collapse;"> <tr><td style="height: 20px;"></td><td style="width: 50%;"></td></tr> <tr><td style="height: 20px;"></td><td></td></tr> <tr><td style="height: 20px;"></td><td></td></tr> </table> |                                                                                     |  |  |  |  |  |  |
|           |                                                                                  |                                                                                                                                                                                                                                                                                                          |                                                                                     |  |  |  |  |  |  |
|           |                                                                                  |                                                                                                                                                                                                                                                                                                          |                                                                                     |  |  |  |  |  |  |
|           |                                                                                  |                                                                                                                                                                                                                                                                                                          |                                                                                     |  |  |  |  |  |  |

**Please place an "X" next to the following statement to indicate your agreement:**

I certify that I have answered every question and have not altered the wording of any of the questions on this form.
